# Supplementary material for: Synthesis and Elimination Pathways of 1-Methanesulfonyl-1,2-dihydroquinoline Sulfonamides
Source: MDPI journal article supplement (doi:10.3390/molecules28073256), 2023-04-05
Supplement: s1 [file s1]

# Synthesis and Elimination Pathways of 1-Methane-sulfonyl-1,2-Dihydroquinoline Sulfonamides

Ebenezer Ametsetor, Kwabena Fobi and Richard A. Bunce\*

\*Correspondence: rab@okstate.edu;

| Compound                                                                                                            | Page |
|---------------------------------------------------------------------------------------------------------------------|------|
| <sup>1</sup> H NMR for (±)-ethyl 2-(acetoxymethyl-2-fluoro-5-nitrophenyl)methylacrylate (13).....                   | 3    |
| <sup>13</sup> C NMR for (±)-ethyl 2-(acetoxymethyl-2-fluoro-5-nitrophenyl)methylacrylate (13) .....                 | 3    |
| <sup>1</sup> H NMR for (±)-ethyl 2-(acetoxymethyl-5-cyano-2-fluorophenyl)methylacrylate (14) .....                  | 4    |
| <sup>13</sup> C NMR for (±)-ethyl 2-(acetoxymethyl-5-cyano-2-fluorophenyl)methylacrylate (14) .....                 | 4    |
| <sup>1</sup> H NMR for (±)-ethyl 2-(acetoxymethyl-2-fluoro-5-(trifluoromethyl)phenyl)methylacrylate (15).....       | 5    |
| <sup>13</sup> C NMR for (±)-ethyl 2-(acetoxymethyl-2-fluoro-5-(trifluoromethyl)phenyl)methylacrylate (15).....      | 5    |
| <sup>1</sup> H NMR for (±)-ethyl 2-(acetoxymethyl-5-chloro-2-fluorophenyl)methylacrylate (16).....                  | 6    |
| <sup>13</sup> C NMR for (±)-ethyl 2-(acetoxymethyl-5-chloro-2-fluorophenyl)methylacrylate (16).....                 | 6    |
| <sup>1</sup> H NMR for (±)-ethyl 2-(acetoxymethyl-2,4,5-trifluorophenyl)methylacrylate (17).....                    | 7    |
| <sup>13</sup> C NMR for (±)-ethyl 2-(acetoxymethyl-2,4,5-trifluorophenyl)methylacrylate (17) .....                  | 7    |
| <sup>1</sup> H NMR for (±)-ethyl (±)-2-(acetoxymethyl-2-fluoropyridin-3-yl)methylacrylate (18).....                 | 8    |
| <sup>13</sup> C NMR for (±)-ethyl 2-(acetoxymethyl-2-fluoropyridin-3-yl)methylacrylate (18).....                    | 8    |
| <sup>1</sup> H NMR for (±)-2-cyano-1-(2-fluoro-5-nitrophenyl)allyl acetate (19) .....                               | 9    |
| <sup>13</sup> C NMR for (±)-2-cyano-1-(2-fluoro-5-nitrophenyl)allyl acetate (19) .....                              | 9    |
| <sup>1</sup> H NMR for (±)-2-cyano-1-(5-cyano-2-fluorophenyl)allyl acetate (20) .....                               | 10   |
| <sup>13</sup> C NMR for (±)-2-cyano-1-(5-cyano-2-fluorophenyl)allyl acetate (20) .....                              | 10   |
| <sup>1</sup> H NMR for (±)-2-cyano-1-(2-fluoro-5-(trifluoromethyl)phenyl)allyl acetate (21).....                    | 11   |
| <sup>13</sup> C NMR for (±)-2-cyano-1-(2-fluoro-5-(trifluoromethyl)phenyl)allyl acetate (21).....                   | 11   |
| <sup>1</sup> H NMR for (±)-1-(5-chloro-2-fluorophenyl)-2-cyanoallyl acetate (22) .....                              | 12   |
| <sup>13</sup> C NMR for (±)-1-(5-chloro-2-fluorophenyl)-2-cyanoallyl acetate (22) .....                             | 12   |
| <sup>1</sup> H NMR for (±)-1-(2-fluoro-5-nitrophenyl)-2-methylene-3-oxobutyl acetate (23).....                      | 13   |
| <sup>13</sup> C NMR for (±)-1-(2-fluoro-5-nitrophenyl)-2-methylene-3-oxobutyl acetate (23) .....                    | 13   |
| <sup>1</sup> H NMR for (±)-1-(5-cyano-2-fluorophenyl)-2-methylene-3-oxobutyl acetate (24).....                      | 14   |
| <sup>13</sup> C NMR for (±)-1-(5-cyano-2-fluorophenyl)-2-methylene-3-oxobutyl acetate (24).....                     | 14   |
| <sup>1</sup> H NMR for (±)-1-(2-fluoro-5-(trifluoromethyl) phenyl)-2-methylene-3-oxobutyl acetate (25).....         | 15   |
| <sup>13</sup> C NMR for (±)-1-(2-fluoro-5-(trifluoromethyl) phenyl)-2-methylene-3-oxobutyl acetate (25) .....       | 15   |
| <sup>1</sup> H NMR for (±)-2-methylene-3-oxo-1-(2,4,5-trifluorophenyl)butyl acetate (26).....                       | 16   |
| <sup>13</sup> C NMR for (±)-2-methylene-3-oxo-1-(2,4,5-trifluorophenyl)butyl acetate (26) .....                     | 16   |
| <sup>1</sup> H NMR for (±)-1-(2-fluoropyridin-3-yl)-2-methylene-3-oxobutyl acetate (27) .....                       | 17   |
| <sup>13</sup> C NMR for (±)-1-(2-fluoropyridin-3-yl)-2-methylene-3-oxobutyl acetate (27) .....                      | 17   |
| <sup>1</sup> H NMR for ethyl 1-(methanesulfonyl)-6-nitro-1, 2-dihydroquinoline-3-carboxylate (28-Ms) .....          | 18   |
| <sup>13</sup> C NMR for ethyl 1-(methanesulfonyl)-6-nitro-1, 2-dihydroquinoline-3-carboxylate (28-Ms) .....         | 18   |
| <sup>1</sup> H NMR for ethyl 6-nitro-1-tosyl-1,2-dihydroquinoline-3-carboxylate (28-Ts).....                        | 19   |
| <sup>13</sup> C NMR for ethyl 6-nitro-1-tosyl-1,2-dihydroquinoline-3-carboxylate (28-Ts) .....                      | 19   |
| <sup>1</sup> H NMR for ethyl 6-cyano-1-(methanesulfonyl)-1,2-dihydroquinoline-3-carboxylate (29) .....              | 20   |
| <sup>13</sup> C NMR for ethyl 6-cyano-1-(methanesulfonyl)-1,2-dihydroquinoline-3-carboxylate (29) .....             | 20   |
| <sup>1</sup> H NMR for ethyl 1-(methanesulfonyl)-6-(trifluoromethyl)-1,2-dihydroquinoline-3-carboxylate (30) .....  | 21   |
| <sup>13</sup> C NMR for ethyl 1-(methanesulfonyl)-6-(trifluoromethyl)-1,2-dihydroquinoline-3-carboxylate (30) ..... | 21   |

|                                                                                                                            |       |
|----------------------------------------------------------------------------------------------------------------------------|-------|
| <sup>1</sup> H NMR for ethyl 6-chloro-1-(methylsulfonyl)-1,2-dihydroquinoline-3-carboxylate ( <b>31</b> ) .....            | 22    |
| <sup>13</sup> C NMR for ethyl 6-chloro-1-(methylsulfonyl)-1,2-dihydroquinoline-3-carboxylate ( <b>31</b> ) .....           | 22    |
| <sup>1</sup> H NMR for ethyl 6,7-difluoro-1-(methylsulfonyl)-1,2-dihydroquinoline-3-carboxylate ( <b>32</b> ) .....        | 23    |
| <sup>13</sup> C NMR for ethyl 6,7-difluoro-1-(methylsulfonyl)-1,2-dihydroquinoline-3-carboxylate ( <b>32</b> ) .....       | 23    |
| <sup>1</sup> H NMR for ethyl 1-(methylsulfonyl)-1,2-dihydro-1,8-naphthyridine-3-carboxylate ( <b>33</b> ) .....            | 29    |
| <sup>13</sup> C NMR for ethyl 1-(methylsulfonyl)-1,2-dihydro-1,8-naphthyridine-3-carboxylate ( <b>33</b> ) .....           | 29    |
| <sup>1</sup> H NMR of 1-(methylsulfonyl)-6-nitro-1,2-dihydronaphthalene-3-carbonitrile ( <b>34</b> ) .....                 | 24    |
| <sup>13</sup> C NMR of 1-(methylsulfonyl)-6-nitro-1,2-dihydronaphthalene-3-carbonitrile ( <b>34</b> ) .....                | 24    |
| <sup>1</sup> H NMR for 1-(1-(methylsulfonyl)-6-nitro-1,2-dihydroquinolin-3-yl)ethan-1-one ( <b>38</b> ) .....              | 25    |
| <sup>13</sup> C NMR for 1-(1-(methylsulfonyl)-6-nitro-1,2-dihydroquinolin-3-yl)ethan-1-one ( <b>38</b> ) .....             | 25    |
| <sup>1</sup> H NMR of 3-acetyl-1-(methylsulfonyl)-1,2-dihydroquinoline-6-carbonitrile ( <b>39</b> ) .....                  | 26    |
| <sup>13</sup> C NMR of 3-acetyl-1-(methylsulfonyl)-1,2-dihydroquinoline-6-carbonitrile ( <b>39</b> ) .....                 | 26    |
| <sup>1</sup> H NMR for 1-(1-(methylsulfonyl)-6-(trifluoromethyl)-1,2-dihydroquinolin-3-yl)ethan-1-one ( <b>40</b> ) .....  | 27    |
| <sup>13</sup> C NMR for 1-(1-(methylsulfonyl)-6-(trifluoromethyl)-1,2-dihydroquinolin-3-yl)ethan-1-one ( <b>40</b> ) ..... | 27    |
| <sup>1</sup> H NMR of 1-(6,7-difluoro-1-(methylsulfonyl)-1,2-dihydroquinolin-3-yl)ethan-1-one ( <b>41</b> ) .....          | 28    |
| <sup>13</sup> C NMR of 1-(6,7-difluoro-1-(methylsulfonyl)-1,2-dihydroquinolin-3-yl)ethan-1-one ( <b>41</b> ) .....         | 28    |
| <sup>1</sup> H for 1-(1-(methylsulfonyl)-1,2-dihydro-1,8-naphthyridin-3-yl)ethan-1-one ( <b>42</b> ) .....                 | 30    |
| <sup>13</sup> C for 1-(1-(methylsulfonyl)-1,2-dihydro-1,8-naphthyridin-3-yl)ethan-1-one ( <b>42</b> ) .....                | 30    |
| <sup>1</sup> H NMR or ethyl 6-nitroquinoline-3-carboxylate ( <b>43</b> from <b>28-Ms</b> ) .....                           | 31    |
| <sup>13</sup> C NMR or ethyl 6-nitroquinoline-3-carboxylate ( <b>43</b> from <b>28-Ms</b> ).....                           | 31    |
| <sup>1</sup> H NMR for ethyl 6-nitroquinoline-3-carboxylate ( <b>43</b> from <b>28-Ts</b> ) .....                          | 32    |
| <sup>13</sup> C NMR for ethyl 6-nitroquinoline-3-carboxylate ( <b>43</b> from <b>28-Ts</b> ) .....                         | 32    |
| <sup>1</sup> H NMR for ethyl 6-cyanoquinoline-3-carboxylate ( <b>44</b> ) .....                                            | 33    |
| <sup>13</sup> C NMR for ethyl 6-cyanoquinoline-3-carboxylate ( <b>44</b> ) .....                                           | 33    |
| <sup>1</sup> H NMR for ethyl 6-(trifluoromethyl)quinoline-3-carboxylate ( <b>45</b> ) .....                                | 34    |
| <sup>13</sup> C NMR for ethyl 6-(trifluoromethyl)quinoline-3-carboxylate ( <b>45</b> ) .....                               | 34    |
| <sup>1</sup> H NMR for ethyl 6-chloroquinoline-3-carboxylate ( <b>46</b> ) .....                                           | 35    |
| <sup>13</sup> C NMR for ethyl 6-chloroquinoline-3-carboxylate ( <b>46</b> ) .....                                          | 35    |
| <sup>1</sup> H NMR for 6-nitroquinoline-3-carbonitrile ( <b>48</b> ) .....                                                 | 36    |
| <sup>13</sup> C NMR for 6-nitroquinoline-3-carbonitrile ( <b>48</b> ) .....                                                | 36    |
| <sup>1</sup> H NMR for ethyl 7-(methylsulfonyl)-6-(phenethylamino)quinoline-3-carboxylate ( <b>49</b> ) .....              | 37    |
| <sup>13</sup> C NMR for ethyl 7-(methylsulfonyl)-6-(phenethylamino)quinoline-3-carboxylate ( <b>49</b> ) .....             | 37    |
| X-ray structure elucidation of <b>49</b> (CCDC 2246638) .....                                                              | 38-49 |

<sup>1</sup>H NMR for (±)-ethyl 2-(acetoxy(2-fluoro-5-nitrophenyl) methyl)acrylate (13)

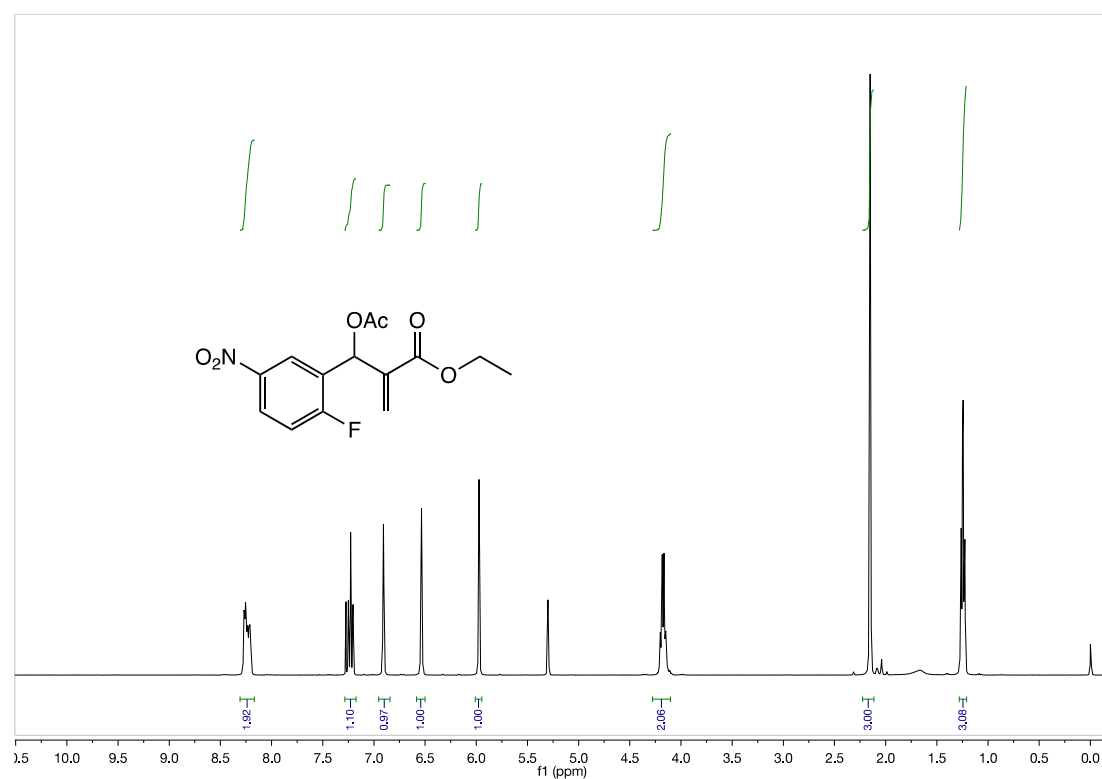

<sup>13</sup>C NMR for (±)-ethyl 2-(acetoxy(2-fluoro-5-nitrophenyl)methyl)acrylate (13)

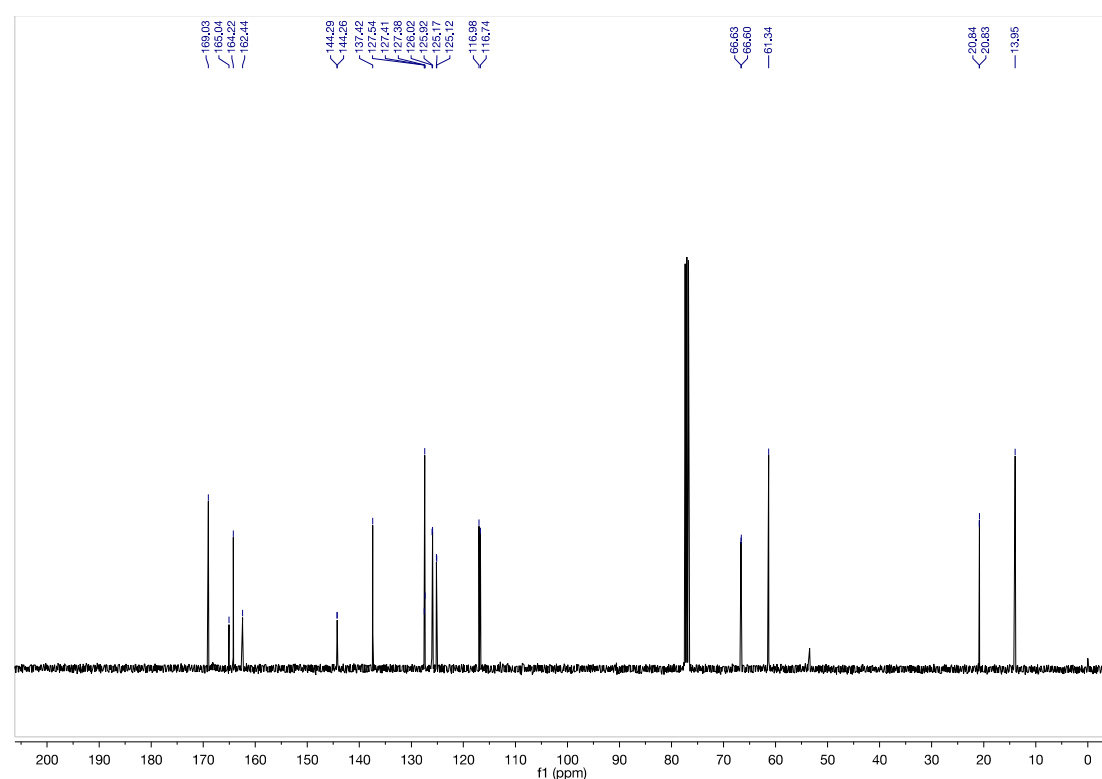

<sup>1</sup>H NMR for (±)-ethyl 2-(acetoxymethyl)-5-cyano-2-fluorophenylacrylate (14)

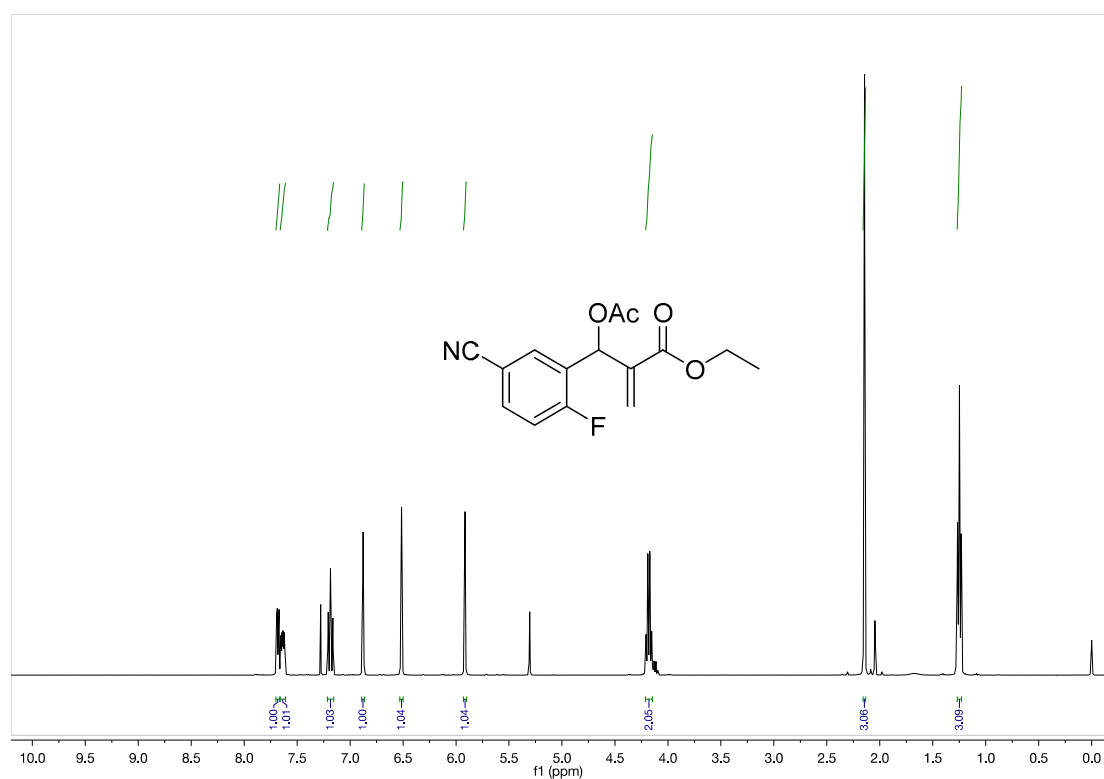

<sup>13</sup>C NMR for (±)-ethyl 2-(acetoxymethyl)-5-cyano-2-fluorophenylacrylate (14)

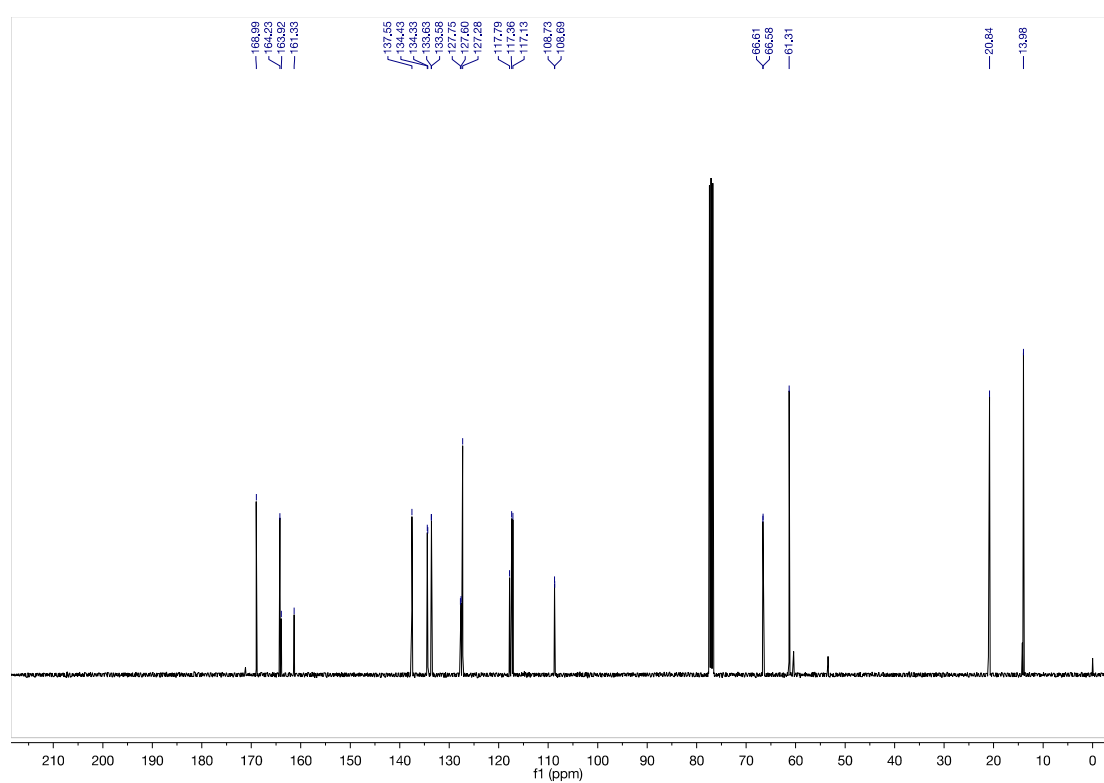

**<sup>1</sup>H NMR for (±)-ethyl 2-(acetoxymethyl)-2-(2-fluoro-5-(trifluoromethyl)phenyl)acrylate (15)**

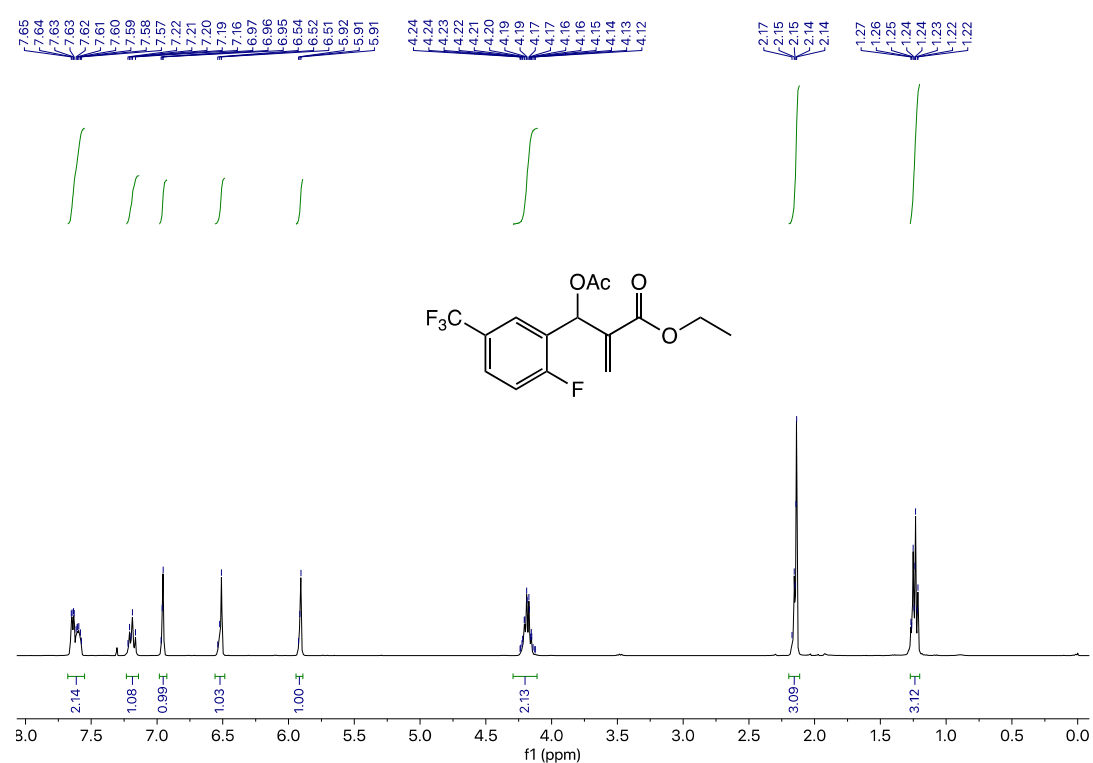

**<sup>13</sup>C NMR for ethyl 2-(acetoxymethyl)-2-(2-fluoro-5-(trifluoromethyl)phenyl)acrylate (15)**

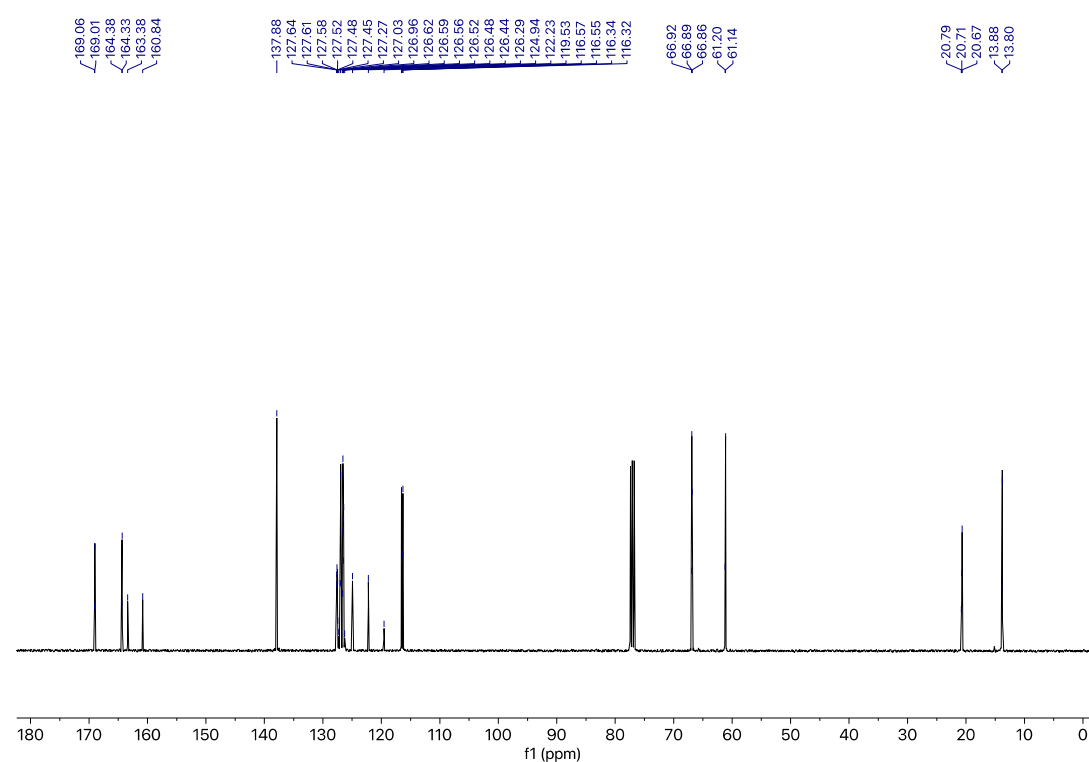

<sup>1</sup>H NMR for (±)-ethyl 2-(acetoxymethyl)-5-chloro-2-fluorophenylacrylate (16)

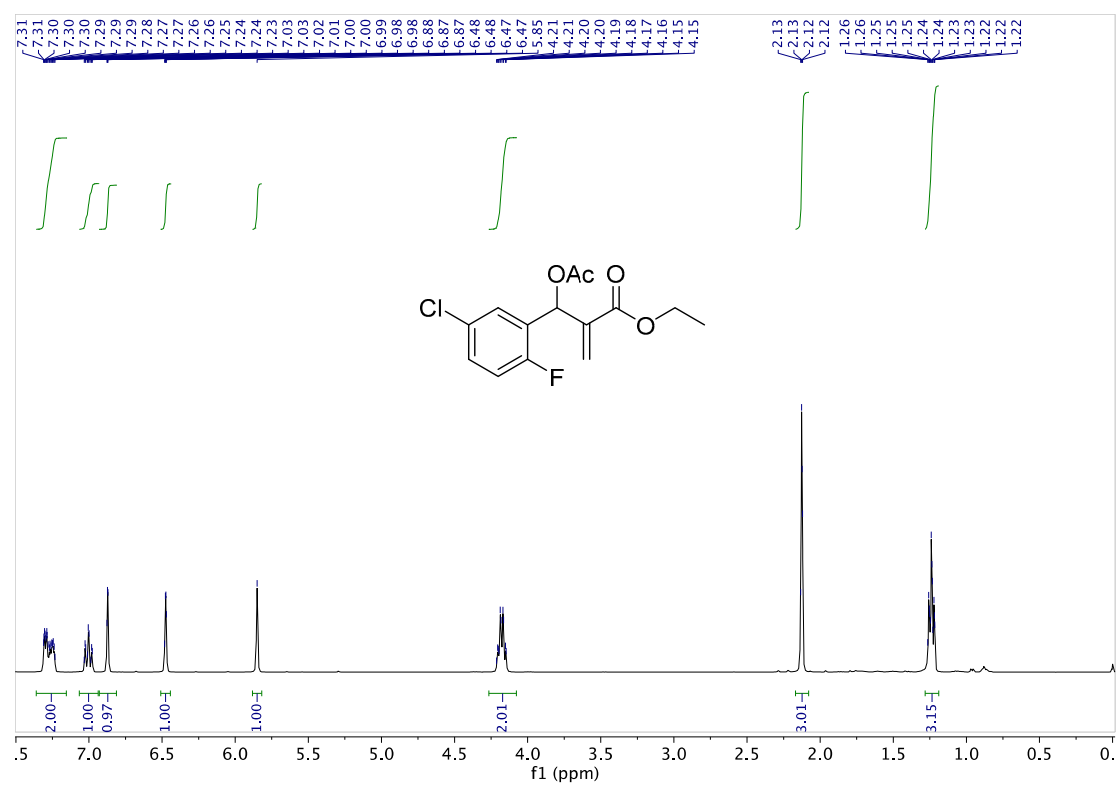

<sup>13</sup>C NMR for (±)-ethyl 2-(acetoxymethyl)-5-chloro-2-fluorophenylacrylate (16)

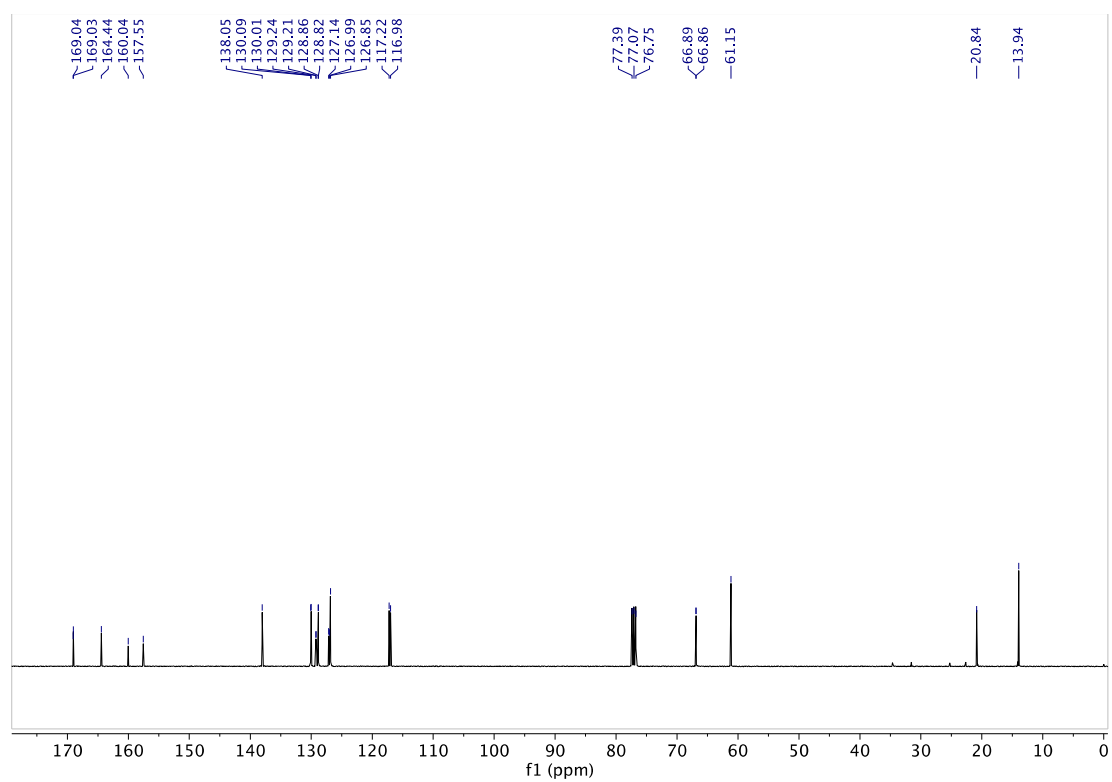

<sup>1</sup>H NMR for (±)-ethyl 2-(acetoxymethyl)-2-(2,4,5-trifluorophenyl)acrylate (17)

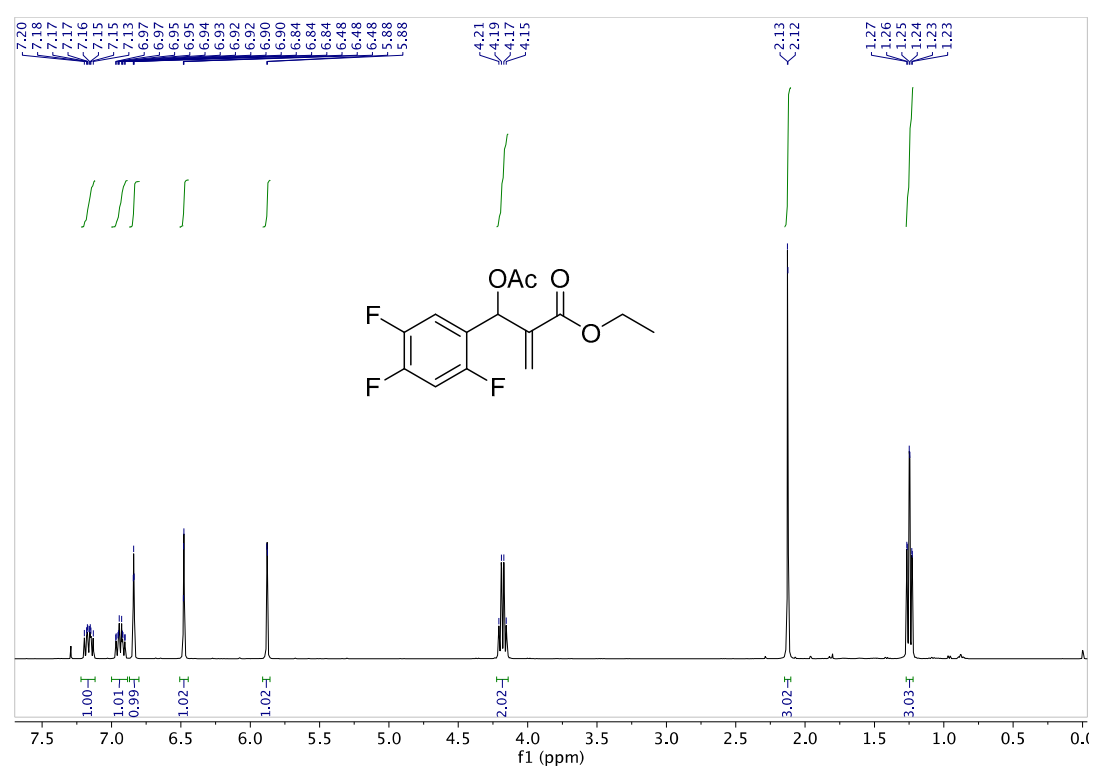

<sup>13</sup>C NMR for (±)-ethyl 2-(acetoxymethyl)-2-(2,4,5-trifluorophenyl)acrylate (17)

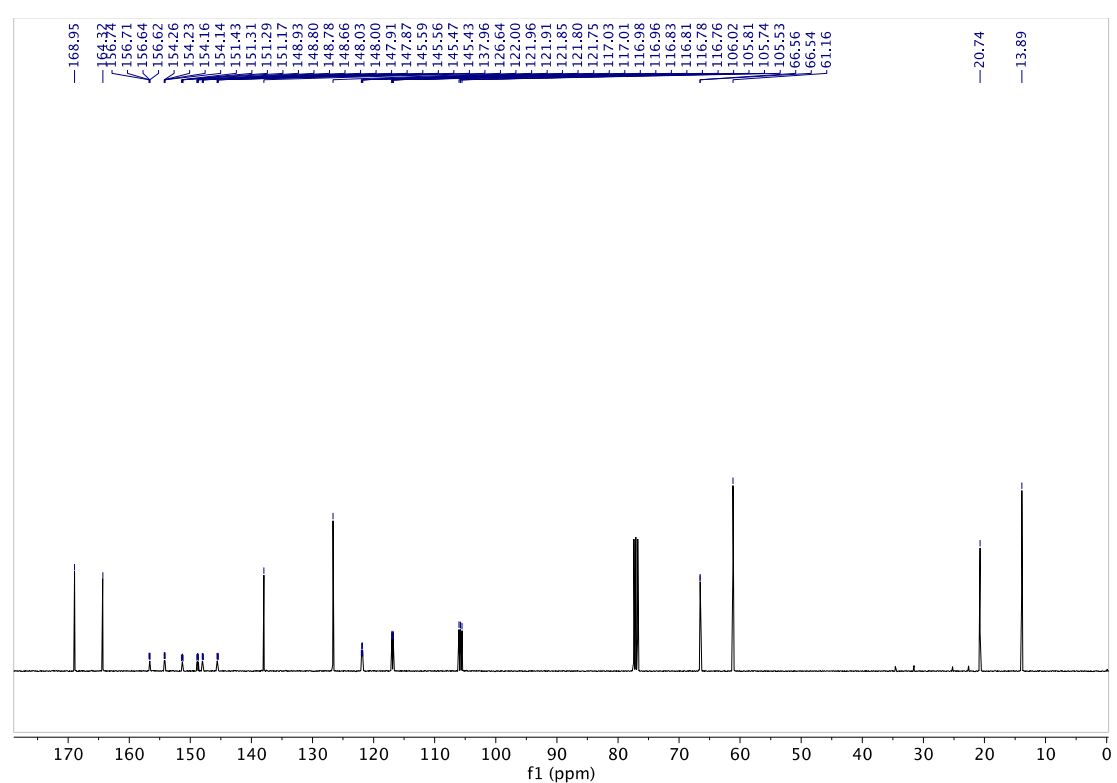

<sup>1</sup>H NMR for (±)-ethyl 2-(acetoxy(2-fluoropyridin-3-yl)methyl)acrylate (18)

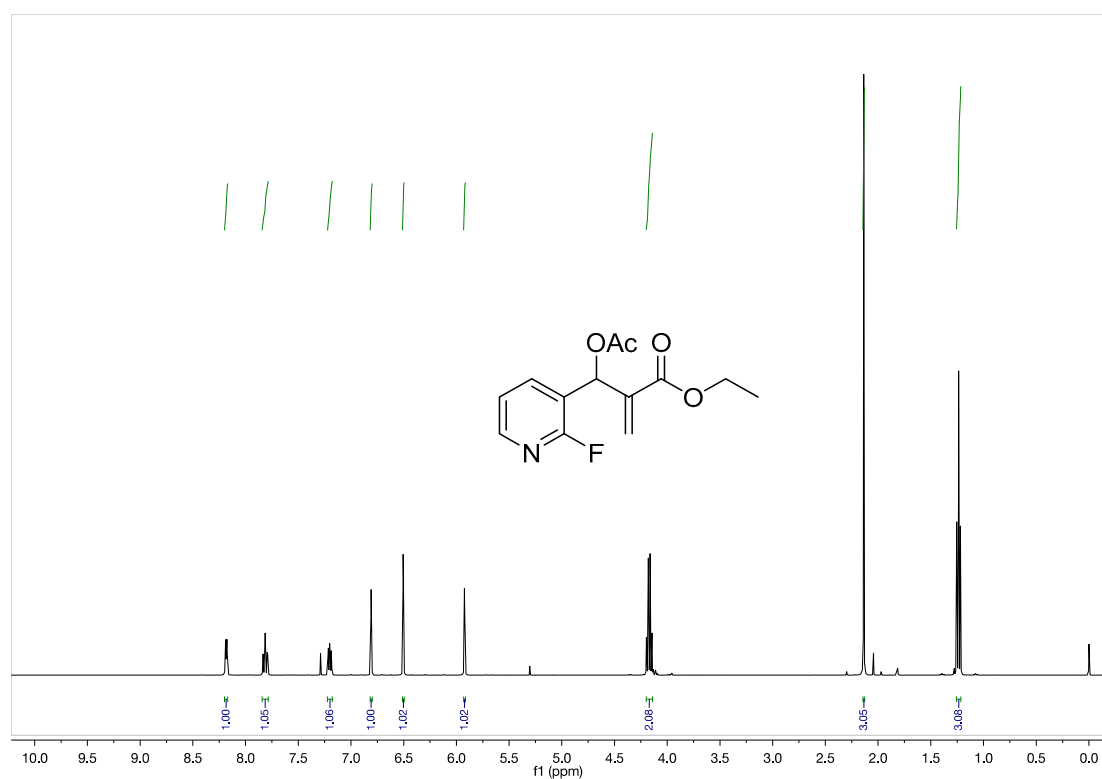

<sup>13</sup>C NMR for (±)-ethyl 2-(acetoxy(2-fluoropyridin-3-yl)methyl)acrylate (18)

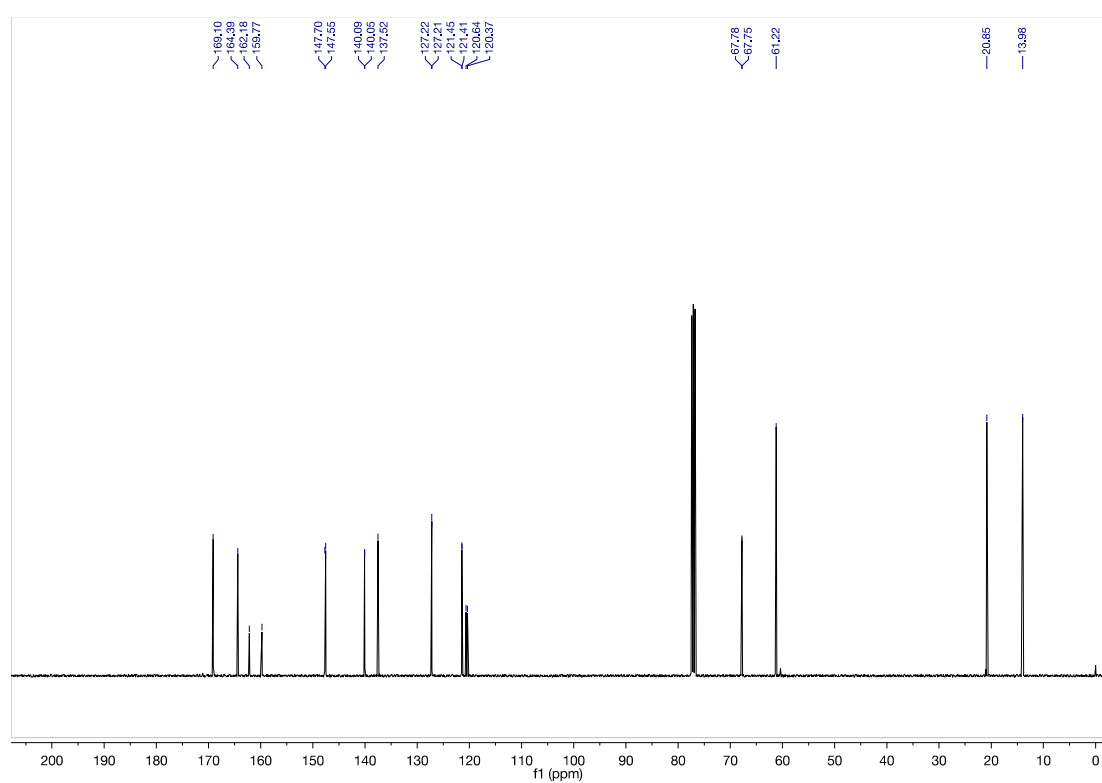



<sup>1</sup>H NMR for (±)-2-cyano-1-(2-fluoro-5-nitrophenyl)allyl acetate (19)

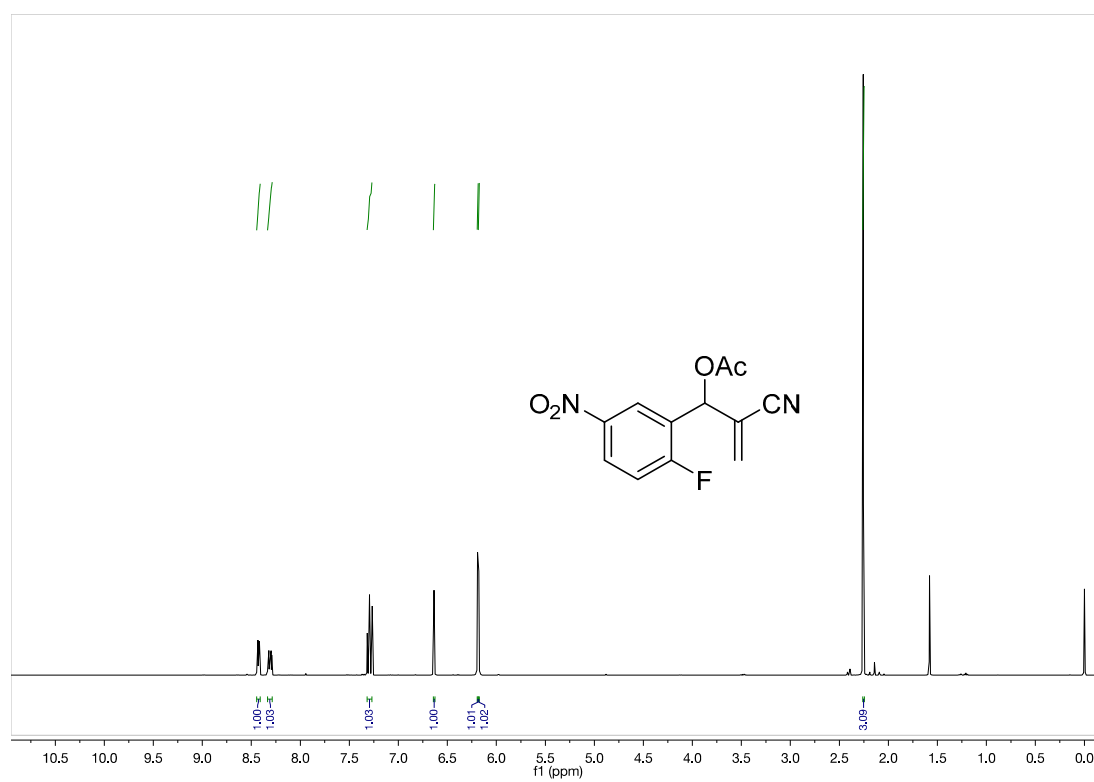

<sup>13</sup>C NMR for (±)-2-cyano-1-(2-fluoro-5-nitrophenyl)allyl acetate (19)

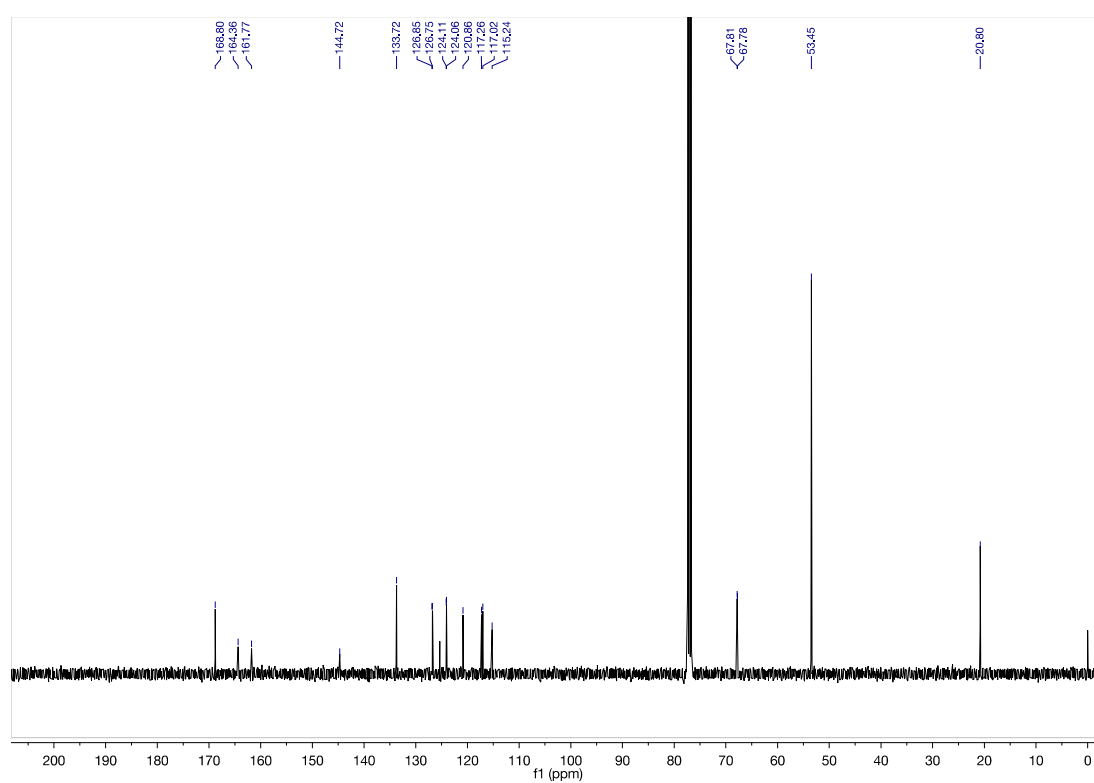

<sup>1</sup>H NMR for (±)-2-cyano-1-(5-cyano-2-fluorophenyl)allyl acetate (20)

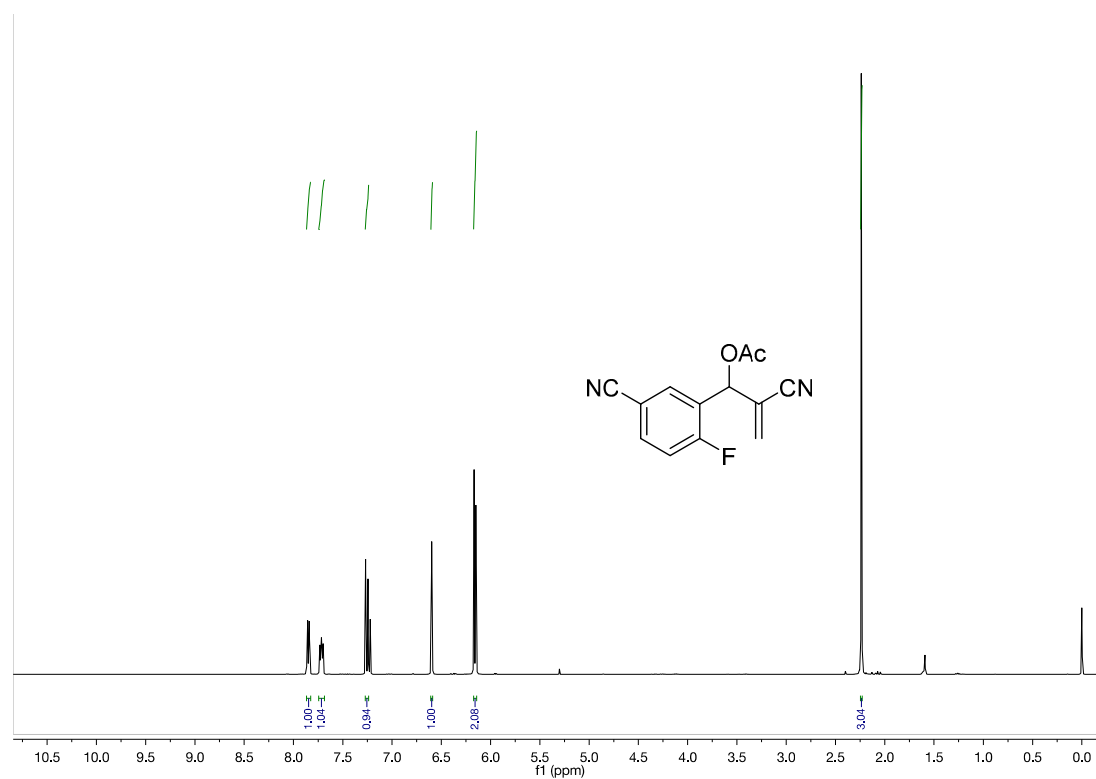

<sup>13</sup>C NMR for (±)-2-cyano-1-(5-cyano-2-fluorophenyl)allyl acetate (20)

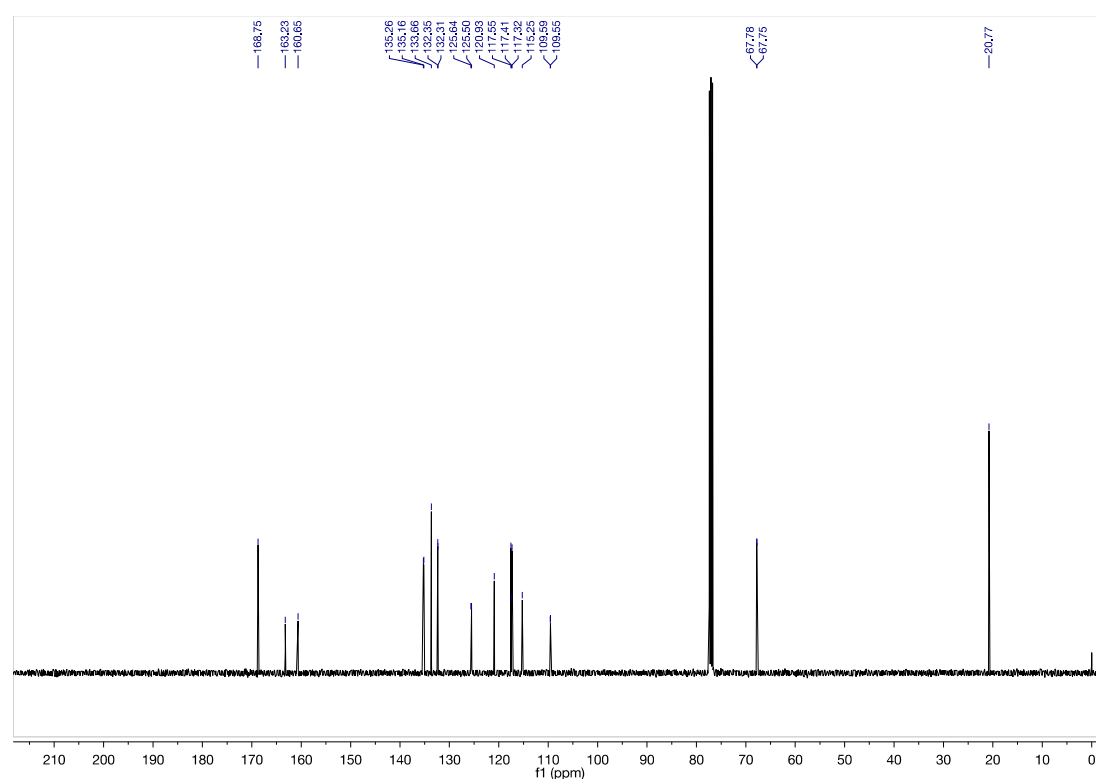

<sup>1</sup>H NMR for (±)-2-cyano-1-(2-fluoro-5-(trifluoromethyl)phenyl)allyl acetate (21)

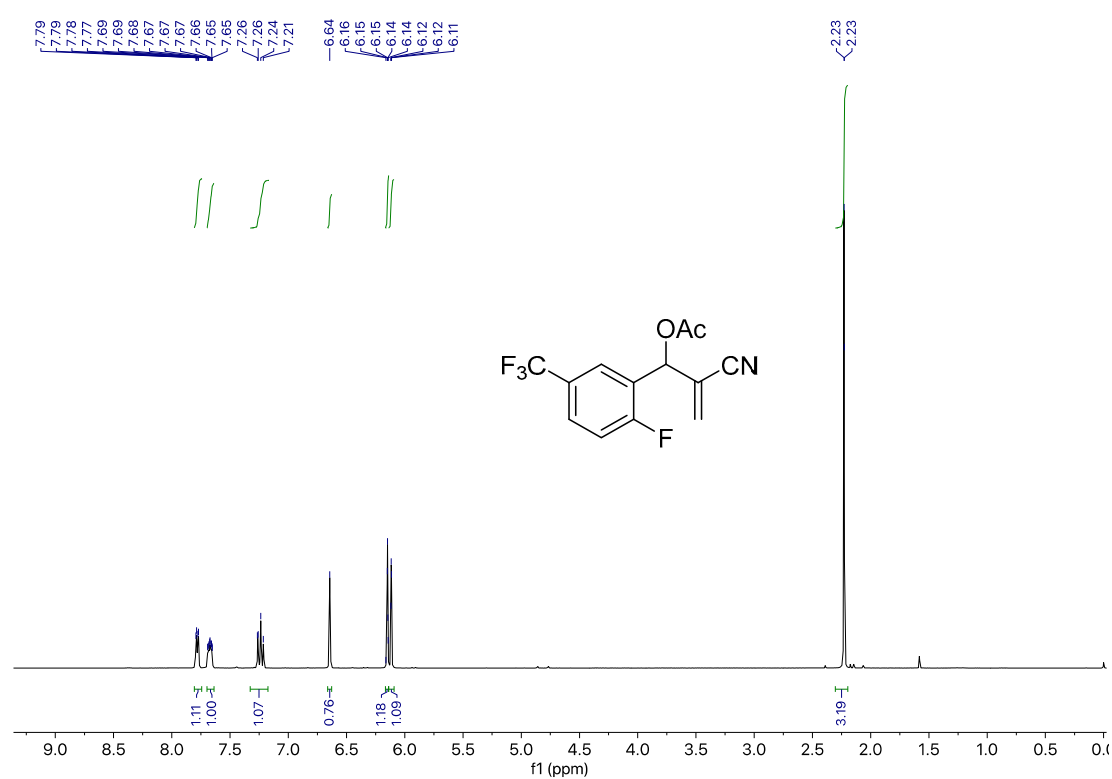

<sup>13</sup>C NMR for (±)-2-cyano-1-(2-fluoro-5-(trifluoromethyl)phenyl)allyl acetate (21)

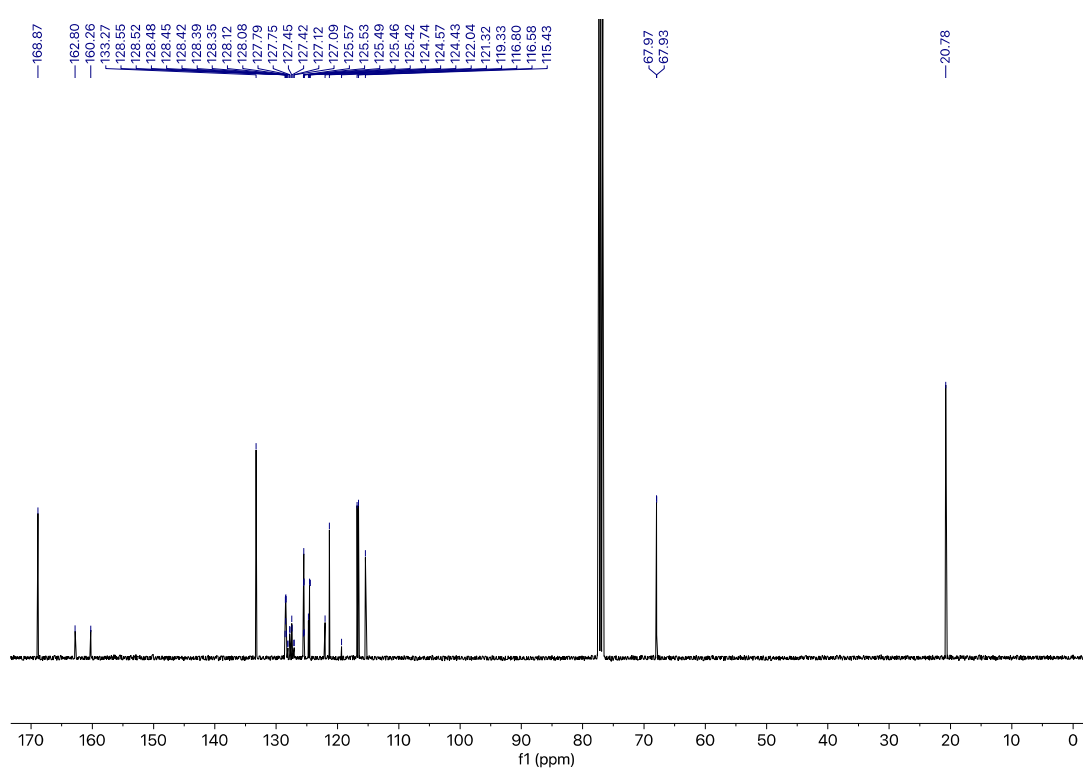

<sup>1</sup>H NMR for (±)-1-(5-chloro-2-fluorophenyl)-2-cyanoallyl acetate (22)

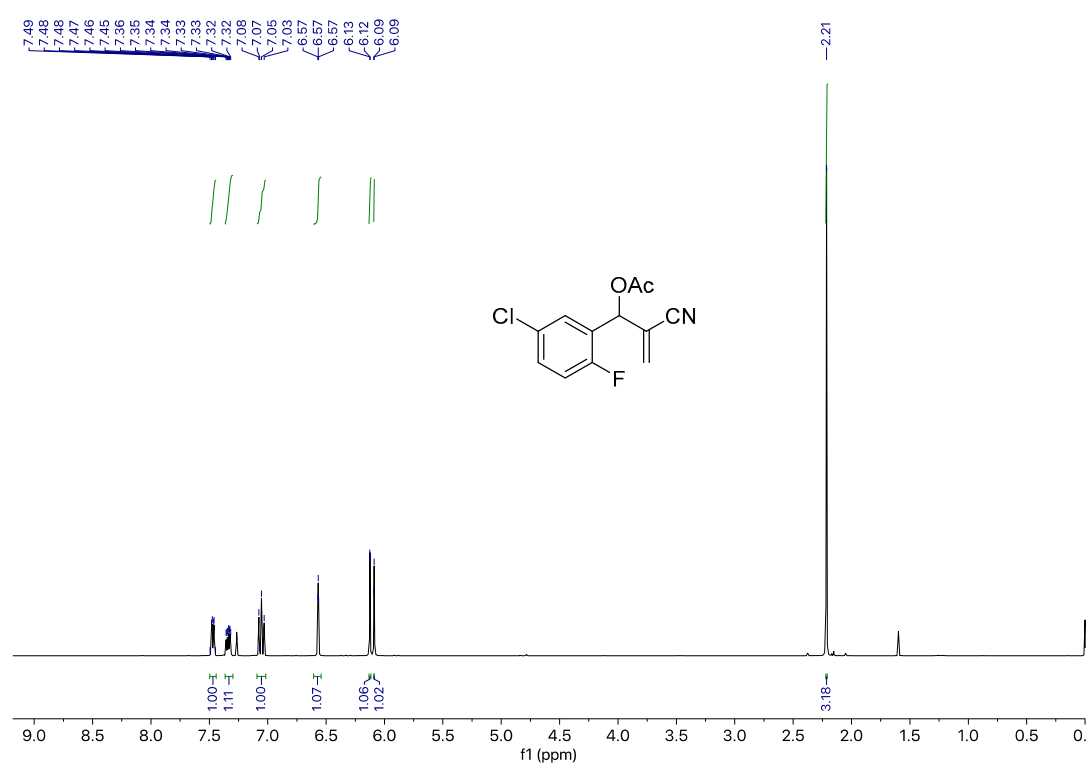

<sup>13</sup>C NMR for (±)-1-(5-chloro-2-fluorophenyl)-2-cyanoallyl acetate (22)

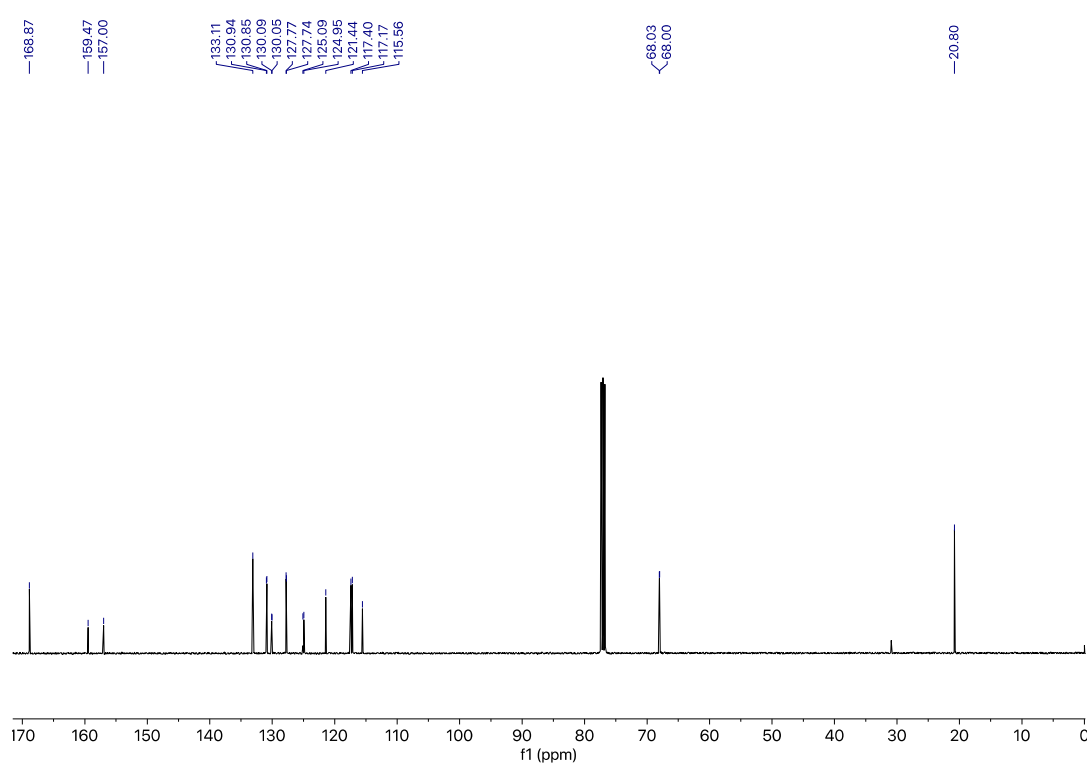

<sup>1</sup>H NMR for (±)-1-(2-fluoro-5-nitrophenyl)-2-methylene-3-oxobutyl acetate (23)

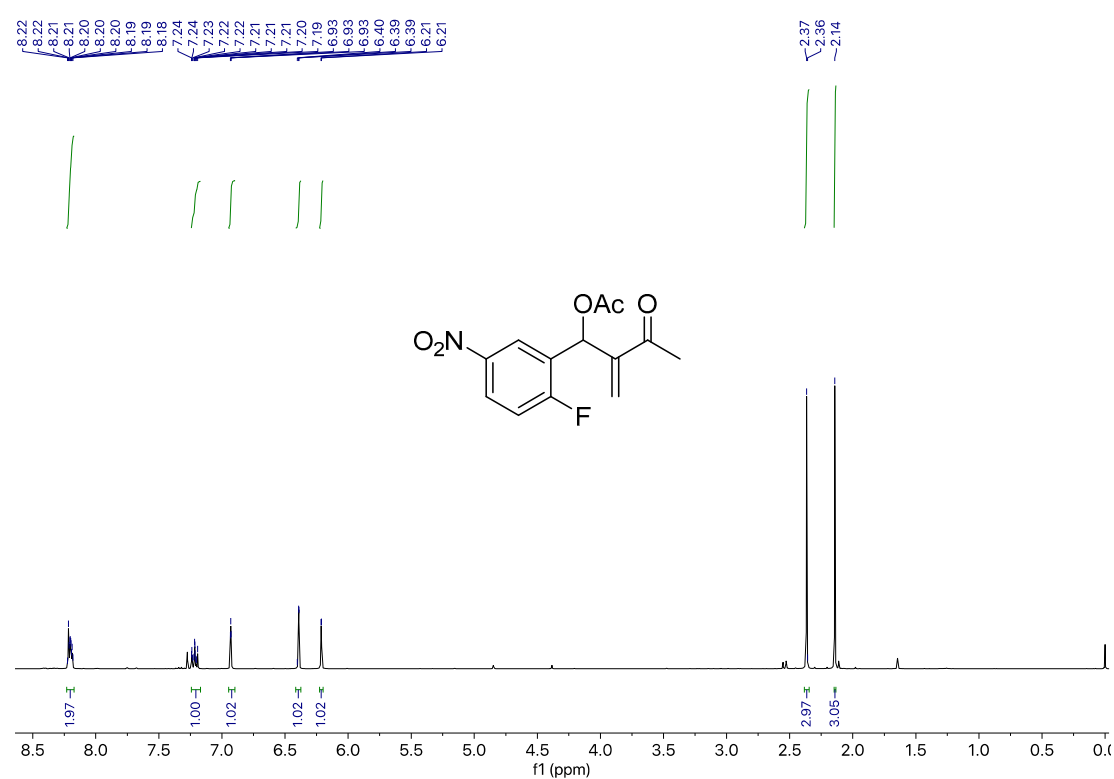

<sup>13</sup>C NMR of (±)-1-(2-fluoro-5-nitrophenyl)-2-methylene-3-oxobutyl acetate (23)

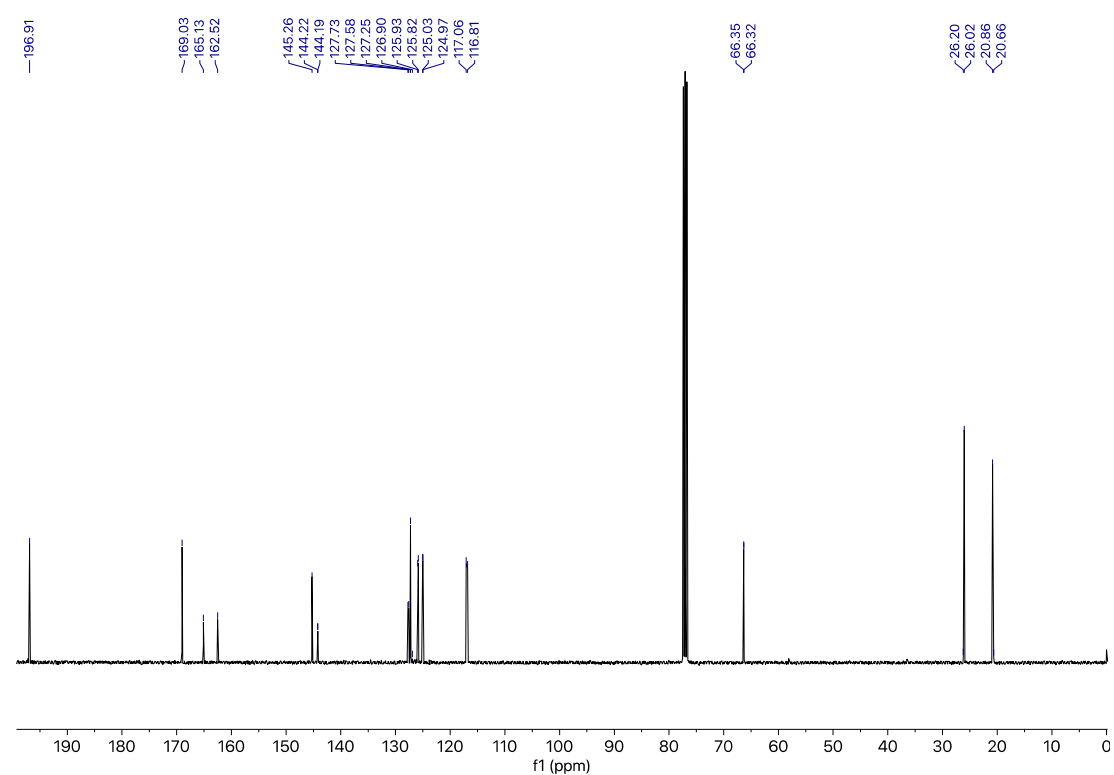

<sup>1</sup>H NMR for (±)-1-(5-cyano-2-fluorophenyl)-2-methylene-3-oxobutyl acetate (24)

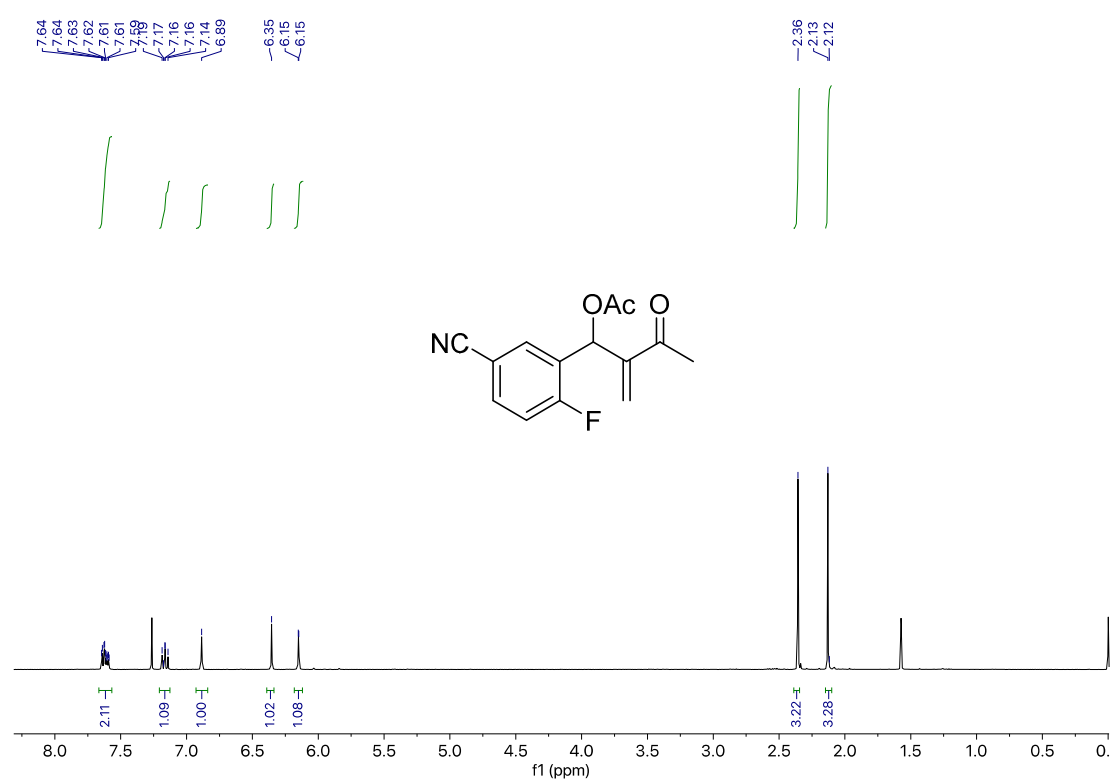

<sup>13</sup>C NMR for (±)-1-(5-cyano-2-fluorophenyl)-2-methylene-3-oxobutyl acetate (24)

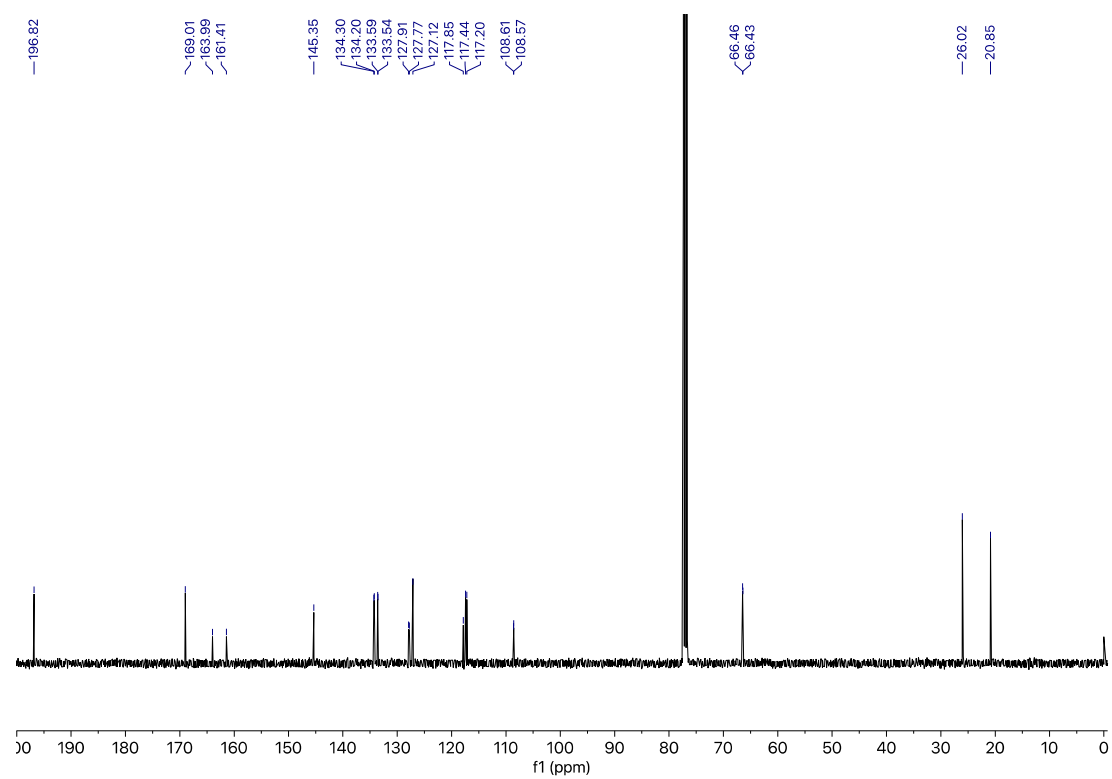

<sup>1</sup>H NMR for (±)-1-(2-fluoro-5-(trifluoromethyl) phenyl)-2-methylene-3-oxobutyl acetate (25)

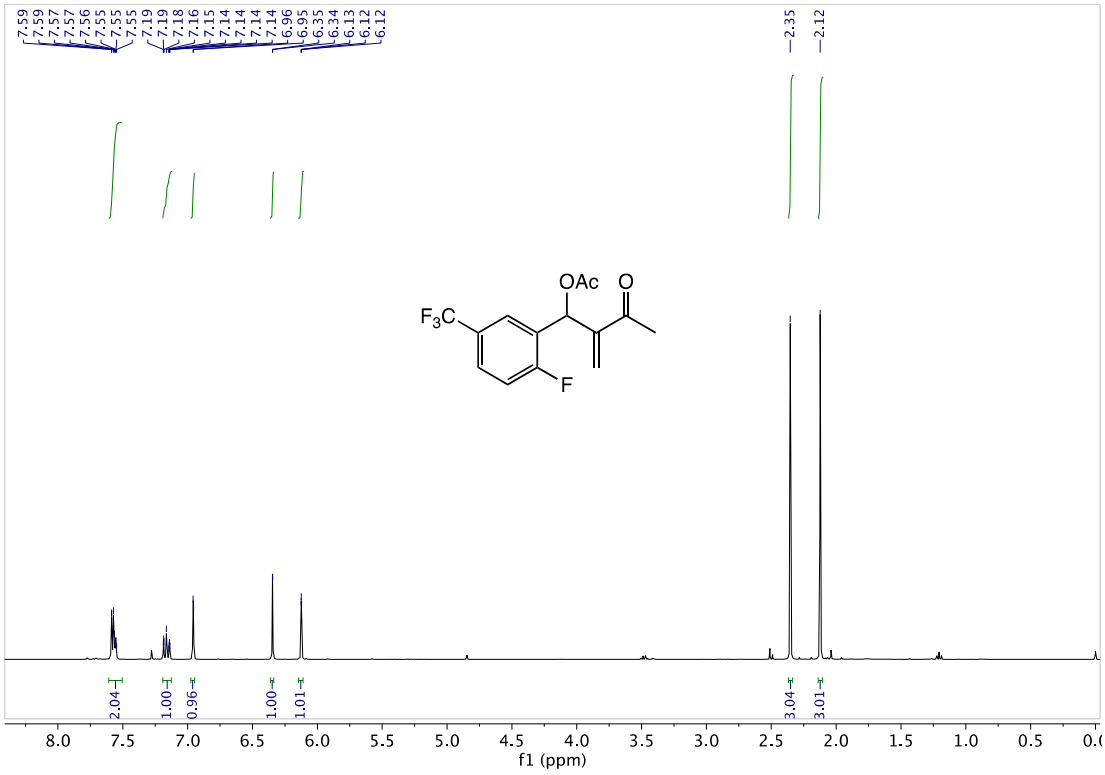

<sup>13</sup>C NMR for (±)-1-(2-fluoro-5-(trifluoromethyl) phenyl)-2-methylene-3-oxobutyl acetate (25)

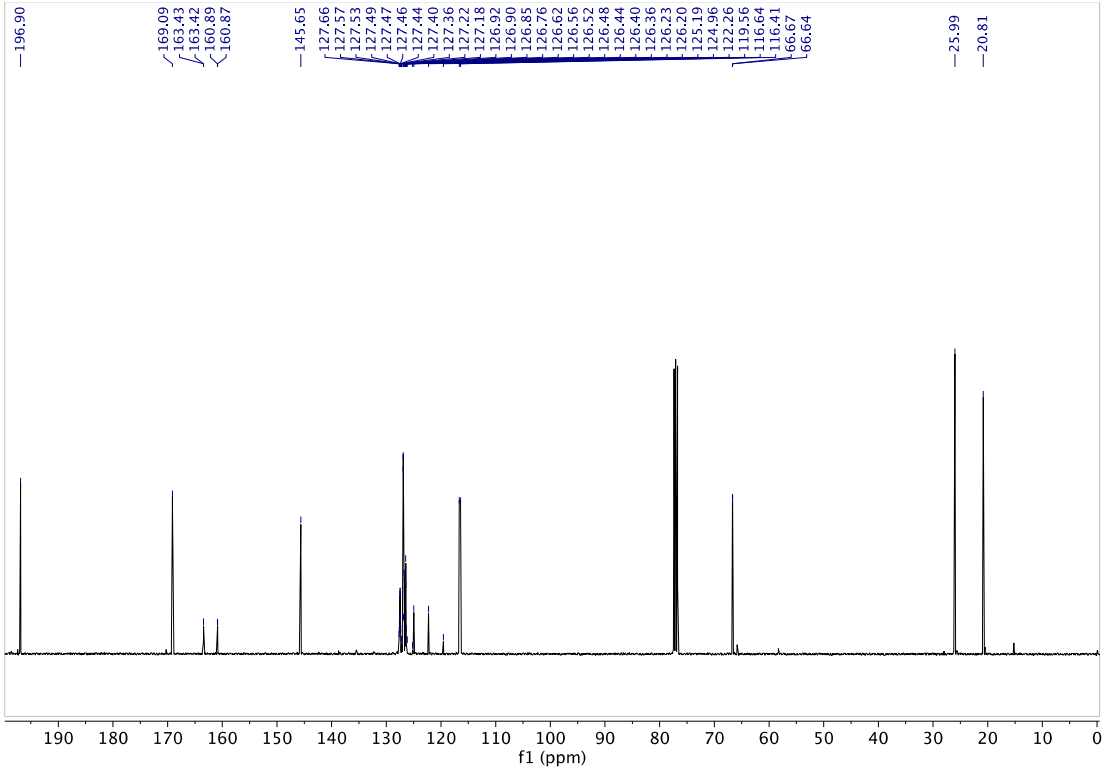

<sup>1</sup>H NMR for (±)-2-methylene-3-oxo-1-(2,4,5-trifluorophenyl)butyl acetate (26)

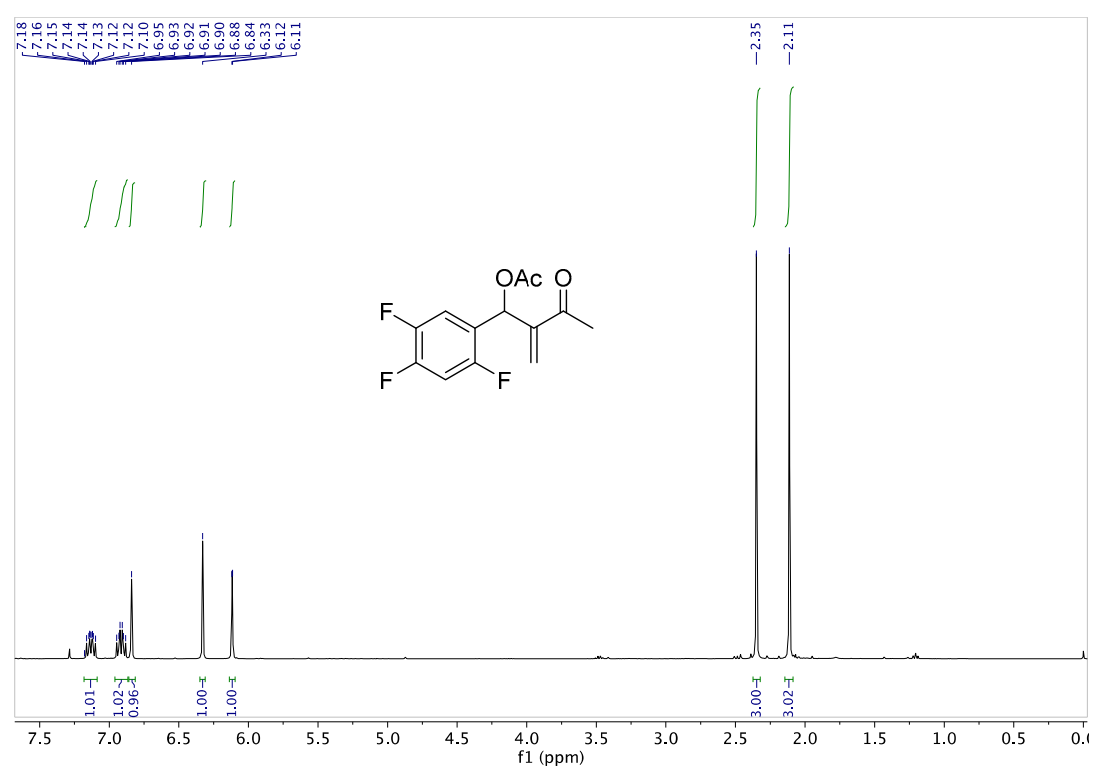

<sup>13</sup>C NMR for (±)-2-methylene-3-oxo-1-(2,4,5-trifluorophenyl)butyl acetate (26)

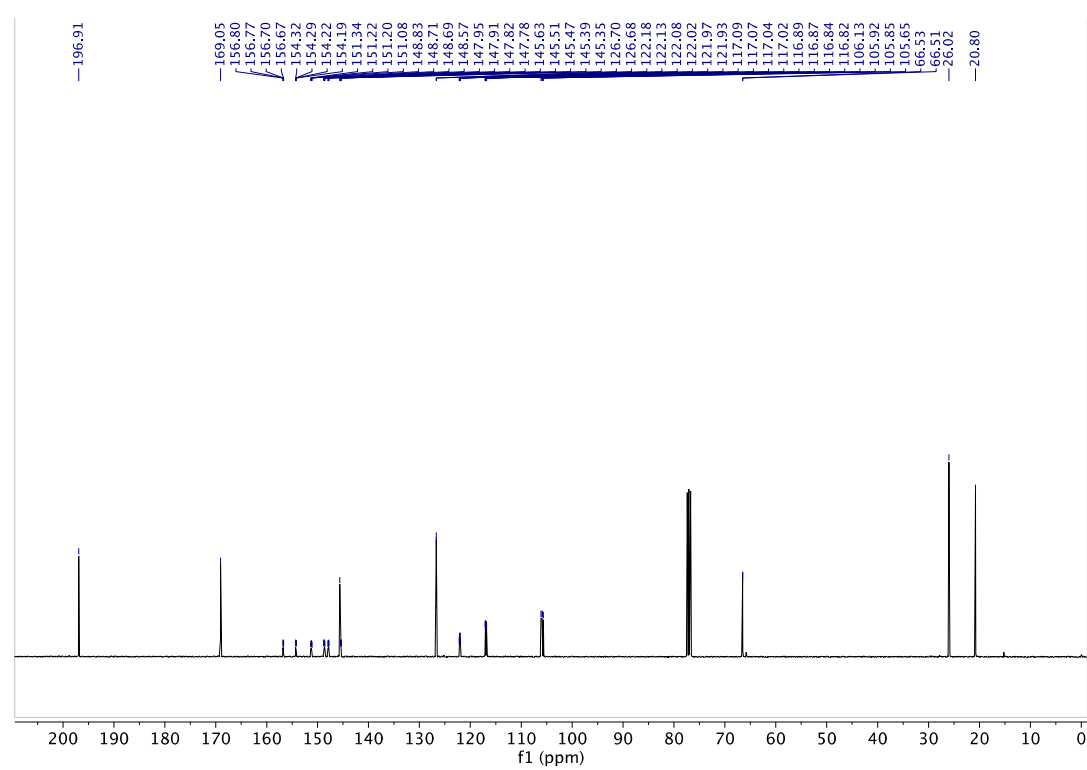



<sup>1</sup>H NMR for (±)-1-(2-fluoropyridin-3-yl)-2-methylene-3-oxobutyl acetate (27)

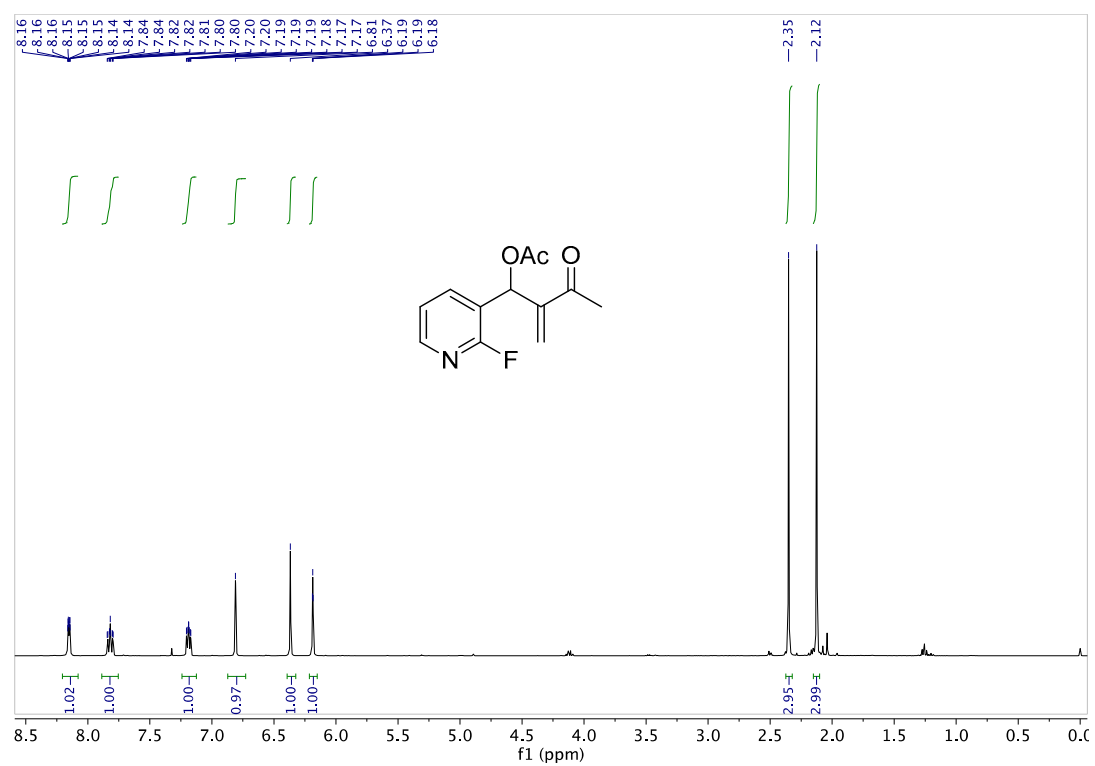

<sup>13</sup>C NMR for (±)-1-(2-fluoropyridin-3-yl)-2-methylene-3-oxobutyl acetate (27)

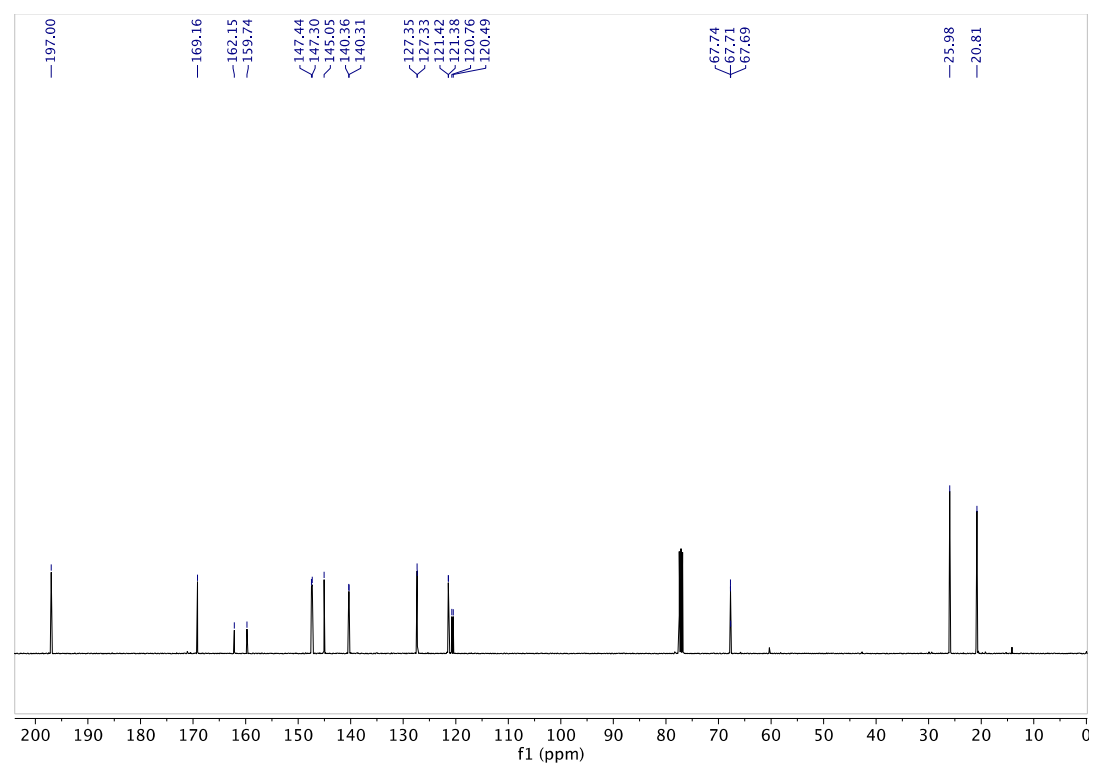

**<sup>1</sup>H NMR for ethyl 1-(methylsulfonyl)-6-nitro-1,2-dihydroquinoline-3-carboxylate (28-Ms)**

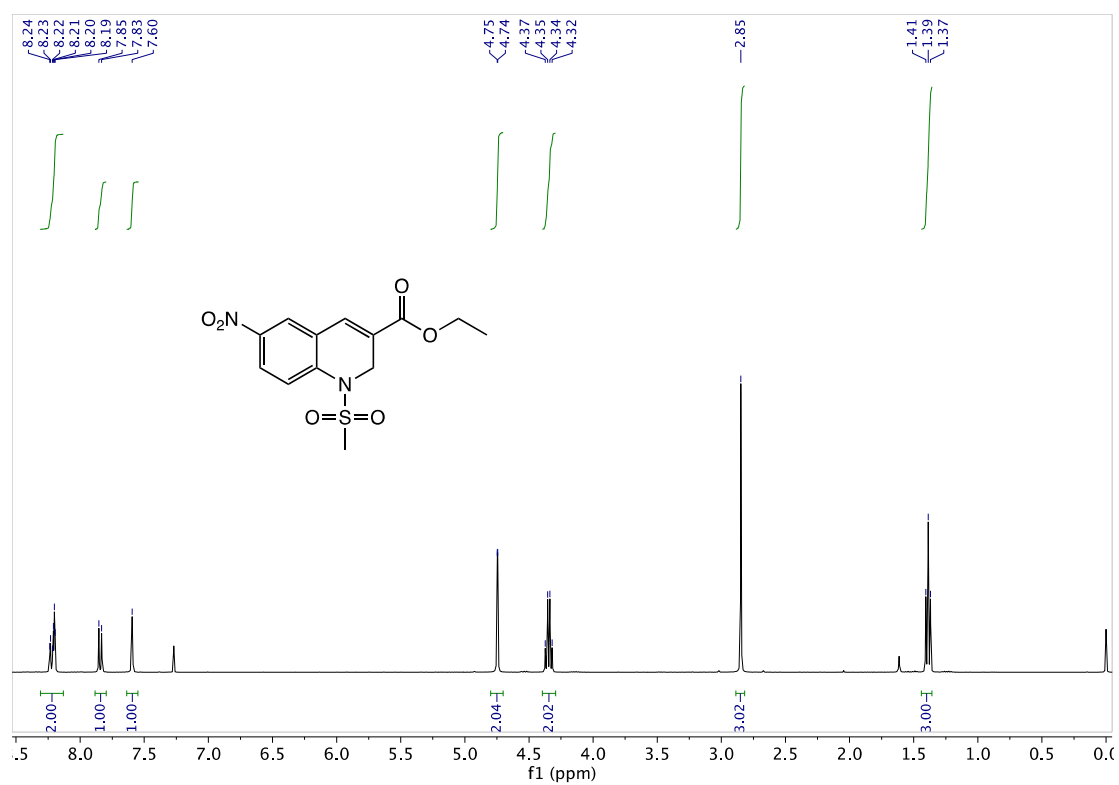

**<sup>13</sup>C NMR for ethyl 1-(methylsulfonyl)-6-nitro-1,2-dihydroquinoline-3-carboxylate (28-Ms)**

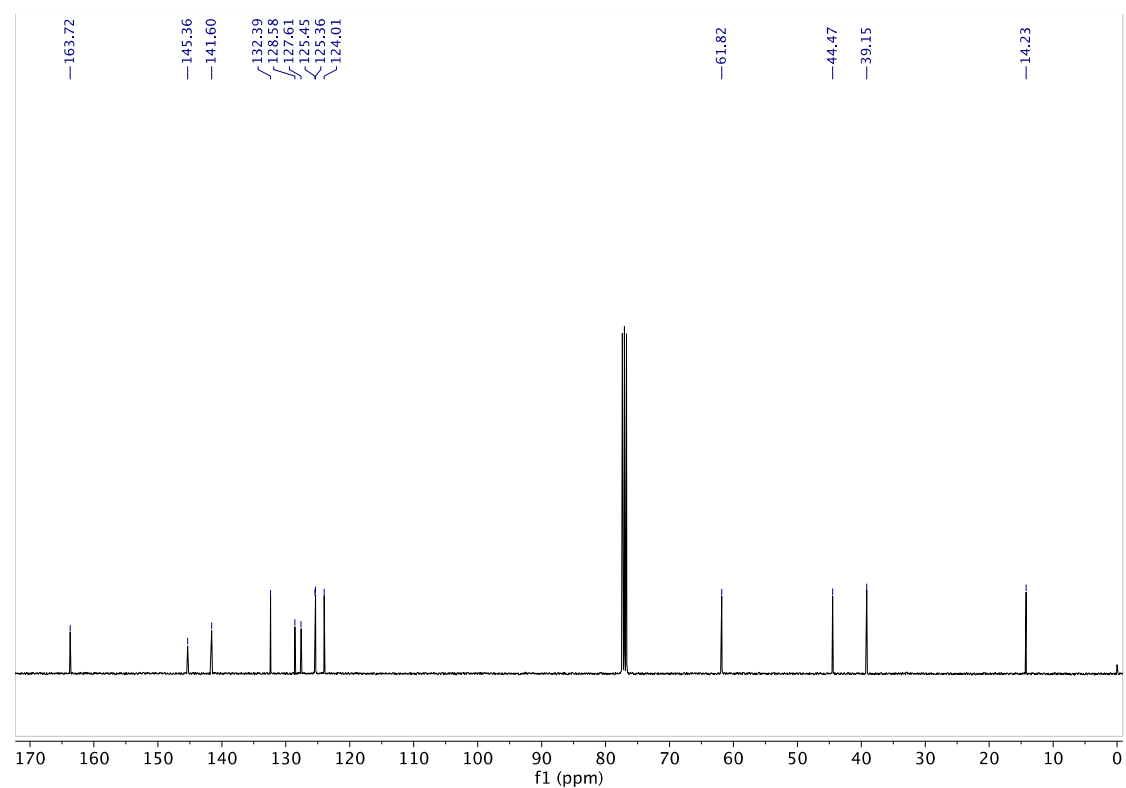

<sup>1</sup>H NMR for ethyl 6-nitro-1-tosyl-1,2-dihydroquinoline-3-carboxylate (28-Ts)

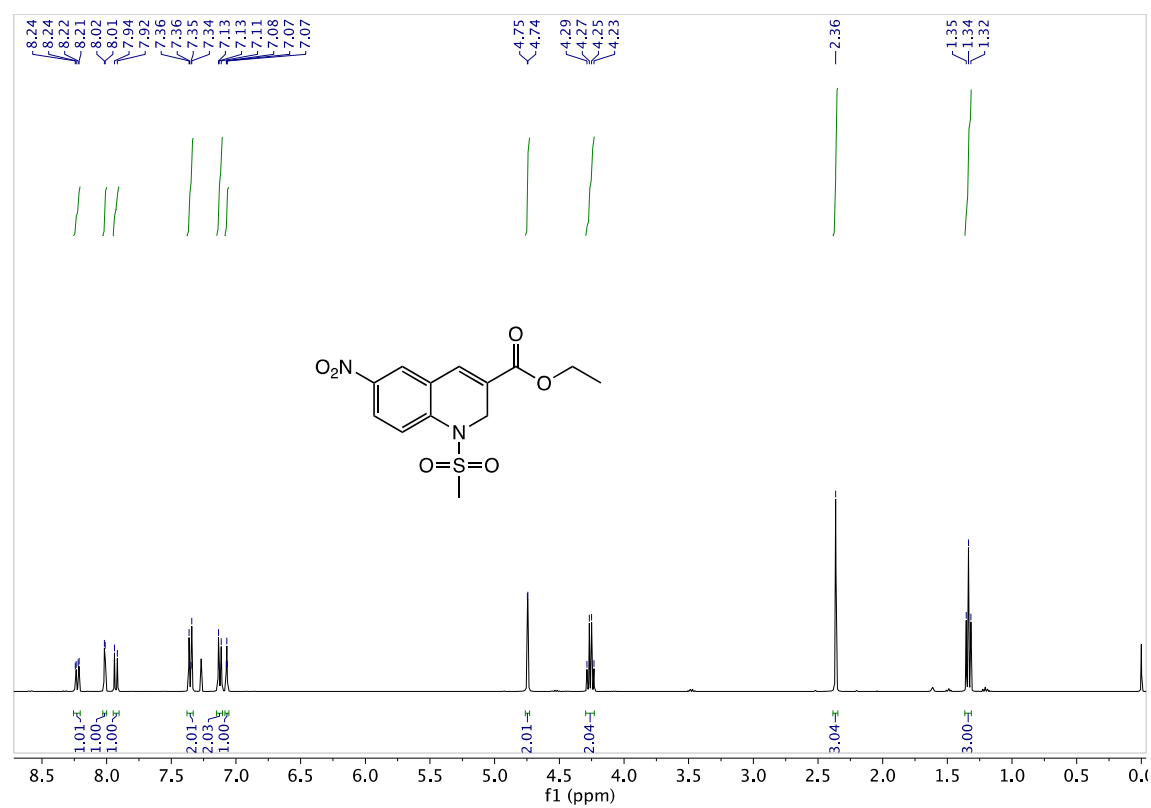

<sup>13</sup>C NMR for ethyl 6-nitro-1-tosyl-1,2-dihydroquinoline-3-carboxylate (28-Ts)

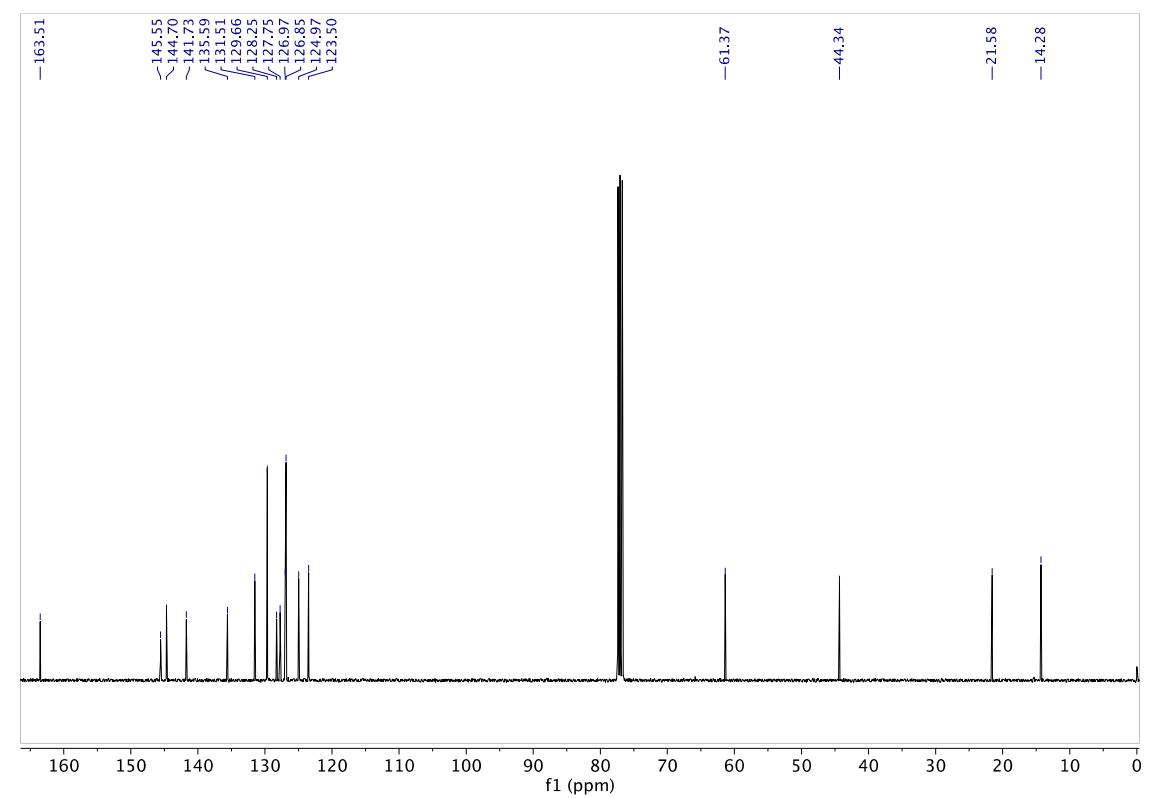

<sup>1</sup>H NMR for ethyl 6-cyano-1-(methylsulfonyl)-1,2-dihydroquinoline-3-carboxylate (29)

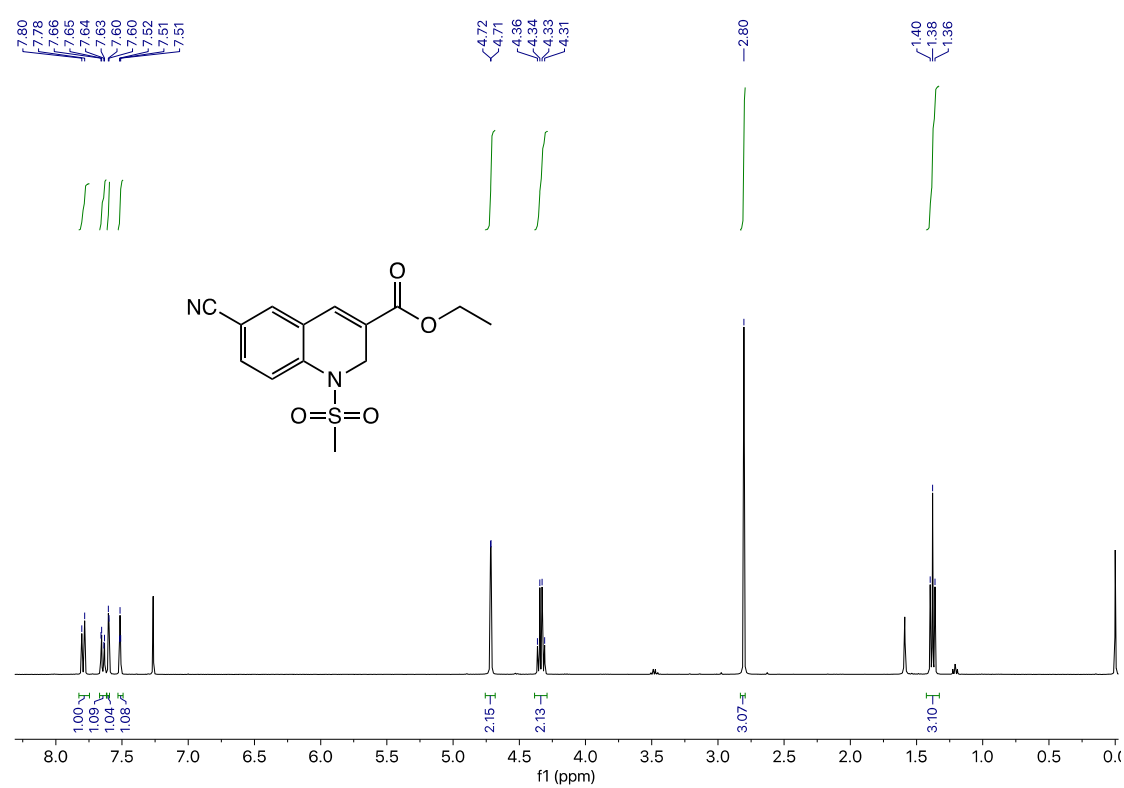

<sup>13</sup>C NMR for ethyl 6-cyano-1-(methylsulfonyl)-1,2-dihydroquinoline-3-carboxylate (29)

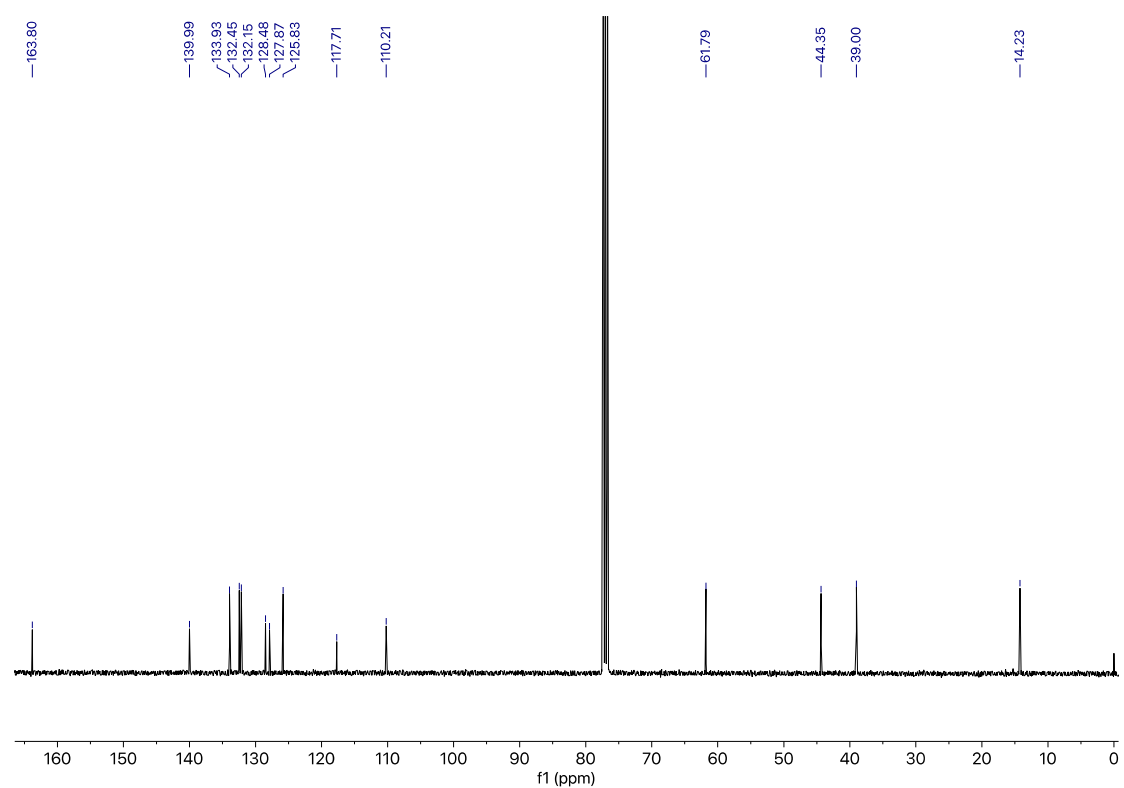

<sup>1</sup>H NMR for ethyl 1-(methylsulfonyl)-6-(trifluoromethyl)-1,2-dihydroquinoline-3-carboxylate (30)

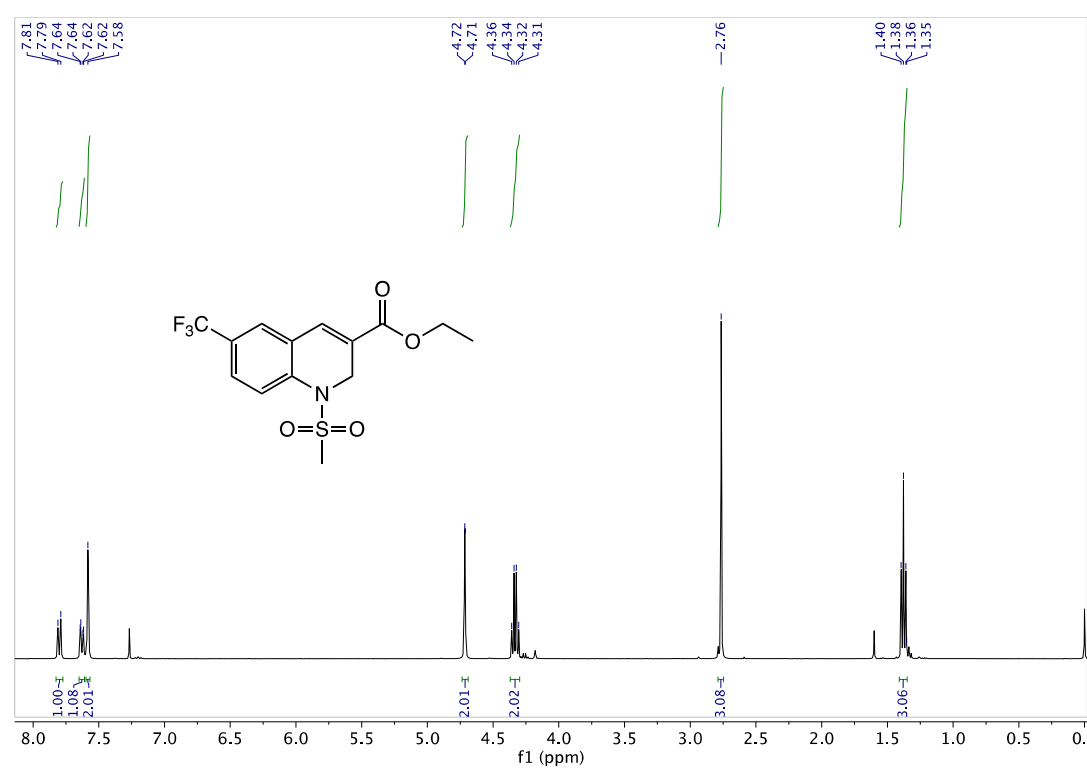

<sup>13</sup>C NMR for ethyl 1-(methylsulfonyl)-6-(trifluoromethyl)-1,2-dihydroquinoline-3-carboxylate (30)

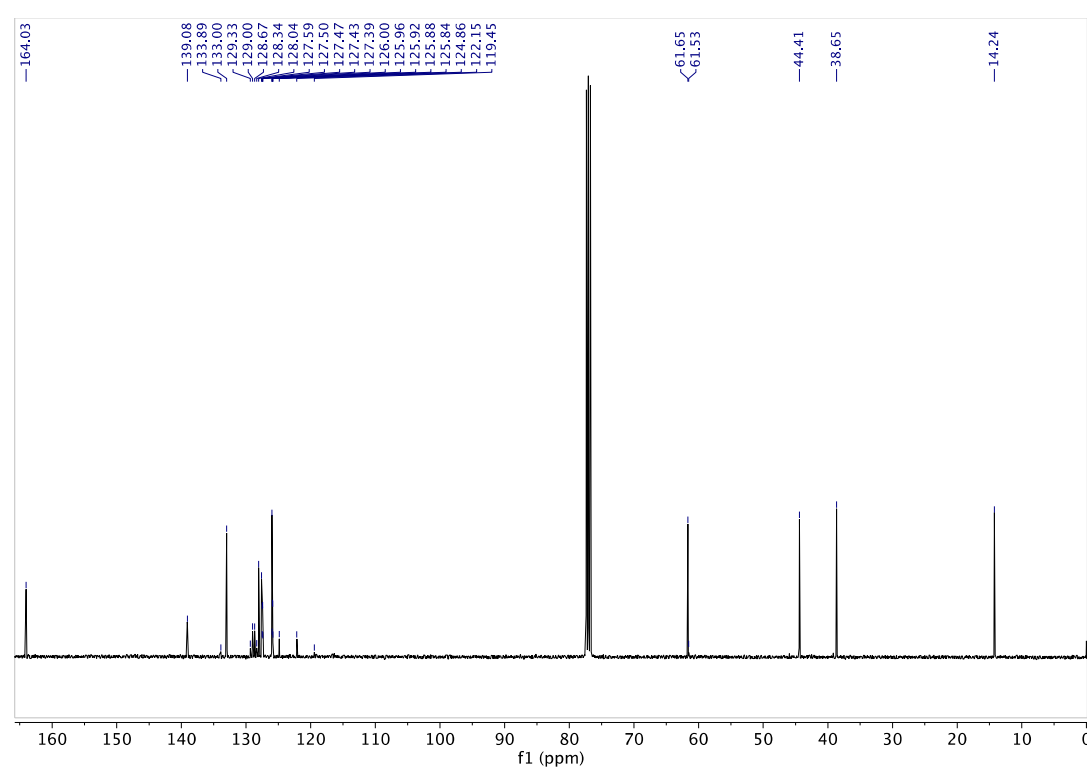

<sup>1</sup>H NMR for ethyl 6-chloro-1-(methylsulfonyl)-1,2-dihydroquinoline-3-carboxylate (31)

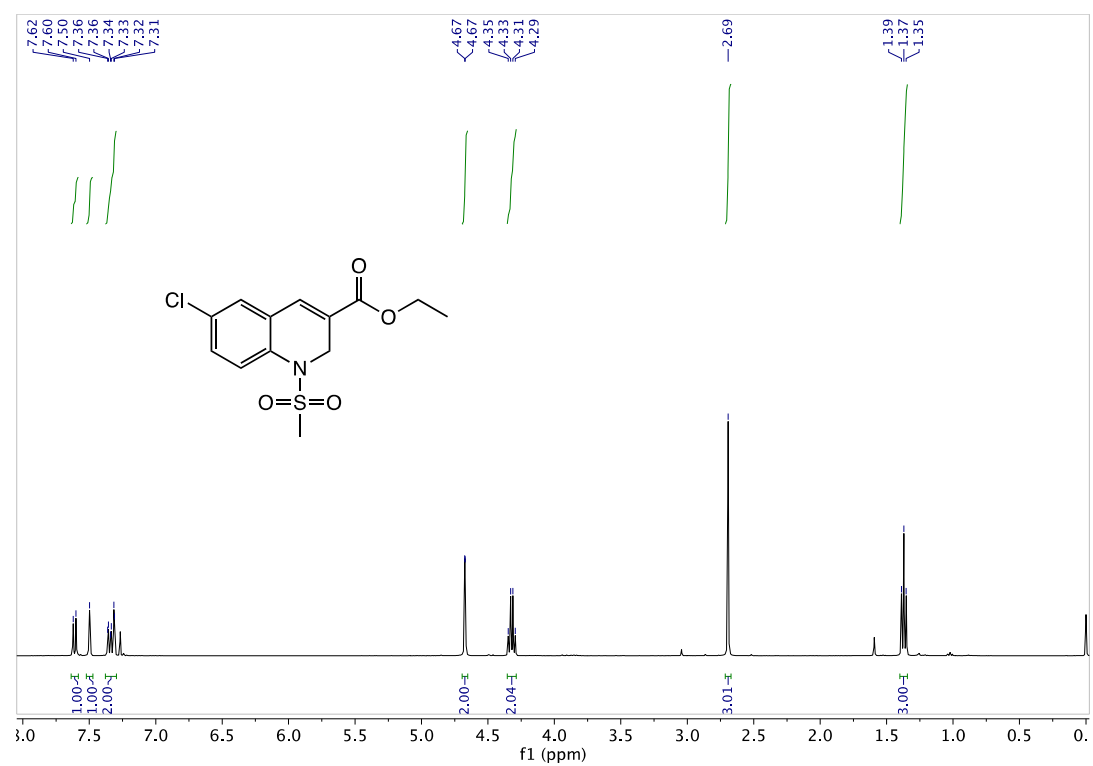

<sup>13</sup>C NMR for ethyl 6-chloro-1-(methylsulfonyl)-1,2-dihydroquinoline-3-carboxylate (31)

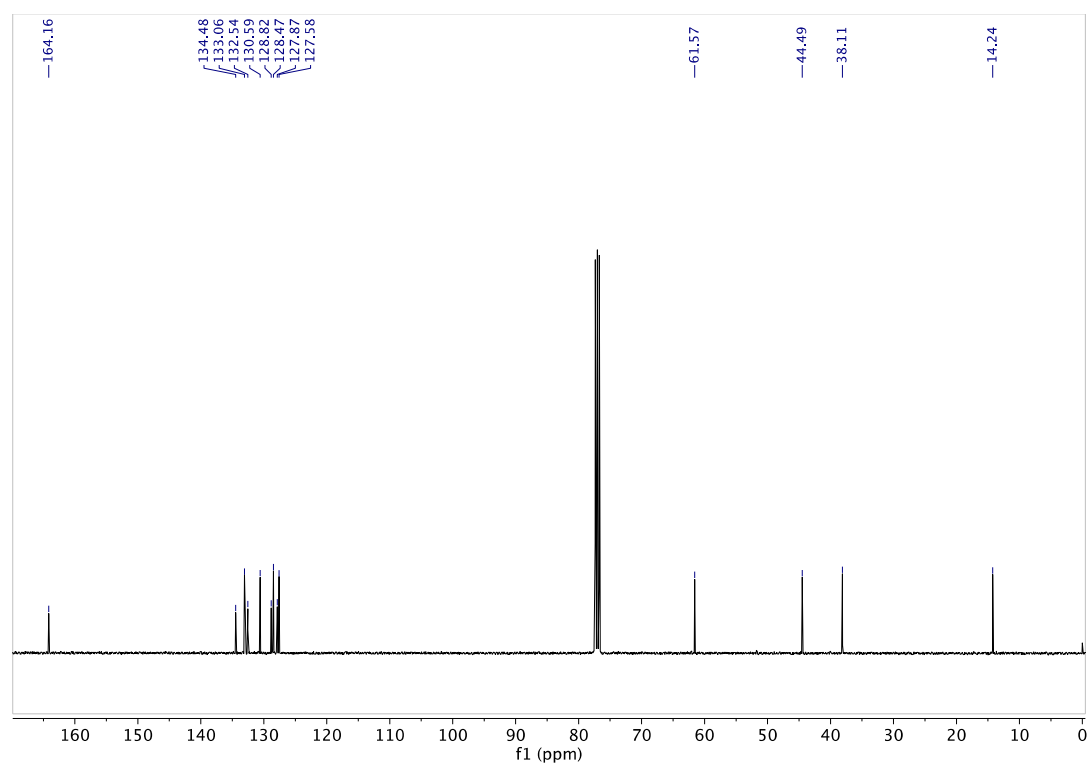

<sup>1</sup>H NMR for ethyl 6,7-difluoro-1-(methylsulfonyl)-1,2-dihydroquinoline-3-carboxylate (32)

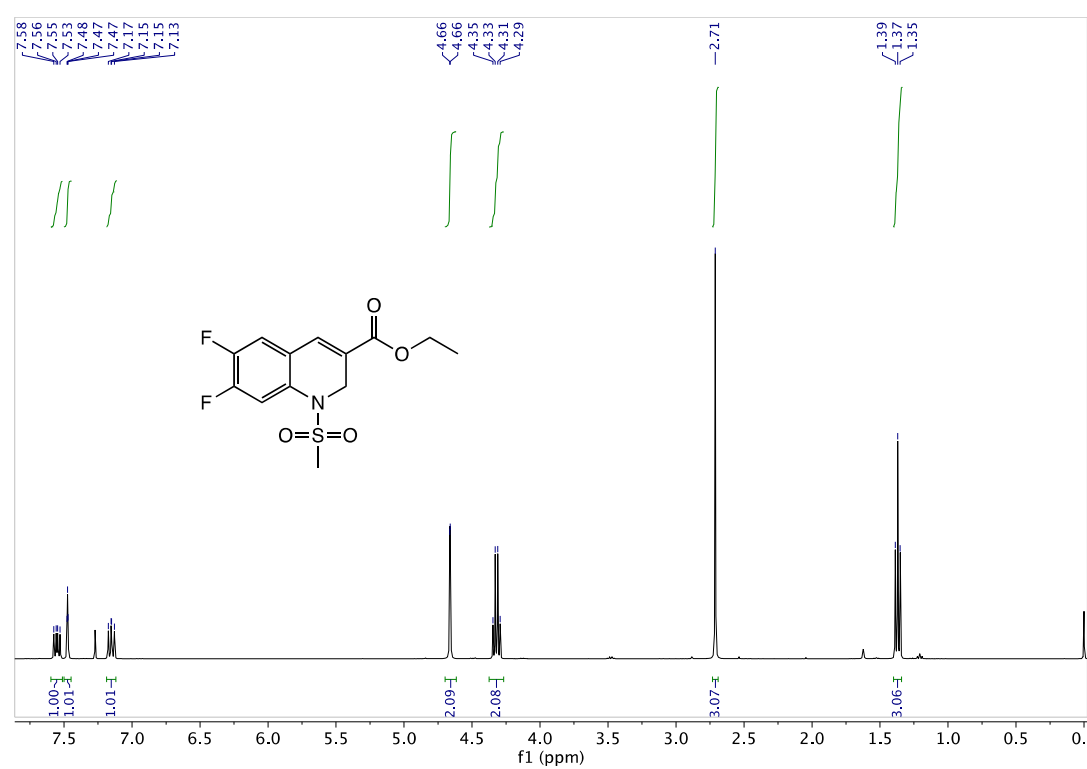

<sup>13</sup>C NMR for ethyl 6,7-difluoro-1-(methylsulfonyl)-1,2-dihydroquinoline-3-carboxylate (32)

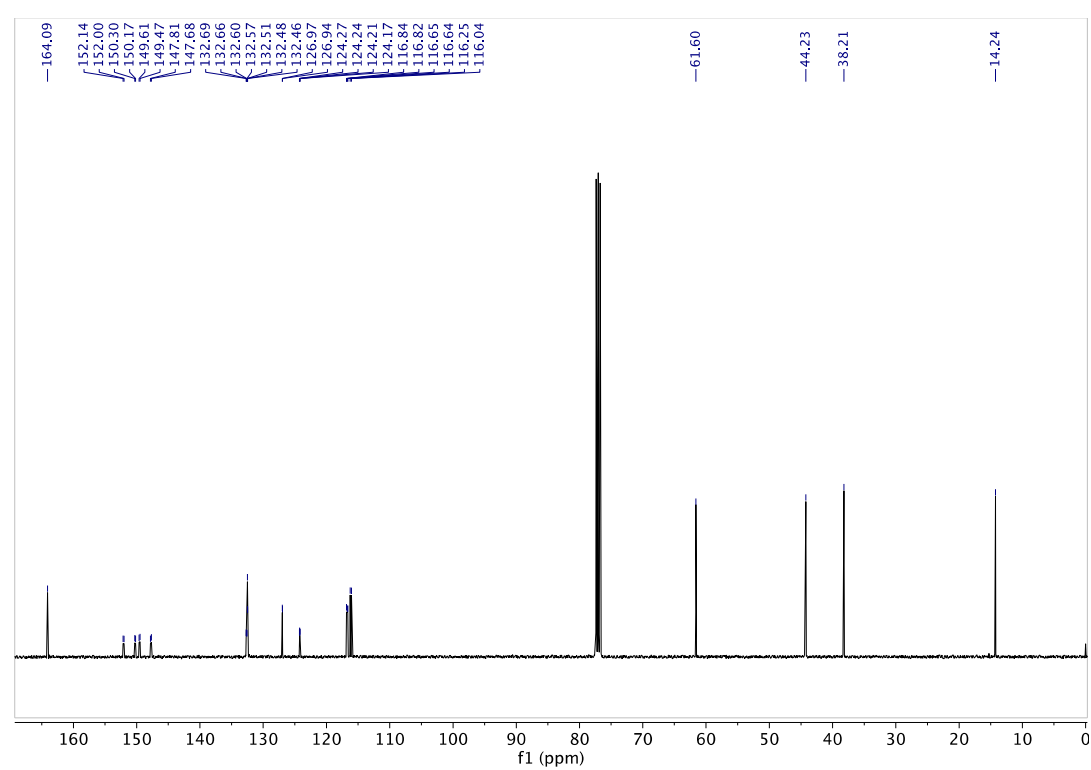

**<sup>1</sup>H NMR for ethyl 1-(methylsulfonyl)-1,2-dihydro-1,8-naphthyridine-3-carboxylate (33)**

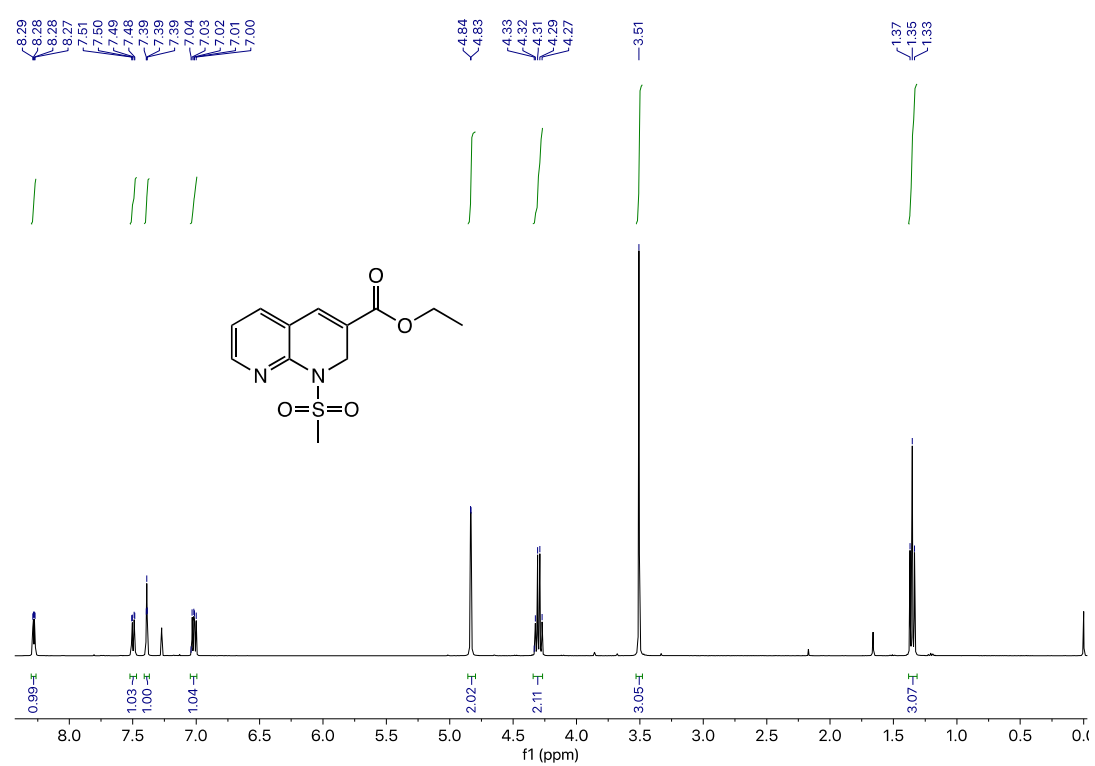

**<sup>13</sup>C NMR for ethyl 1-(methylsulfonyl)-1,2-dihydro-1,8-naphthyridine-3-carboxylate (33)**

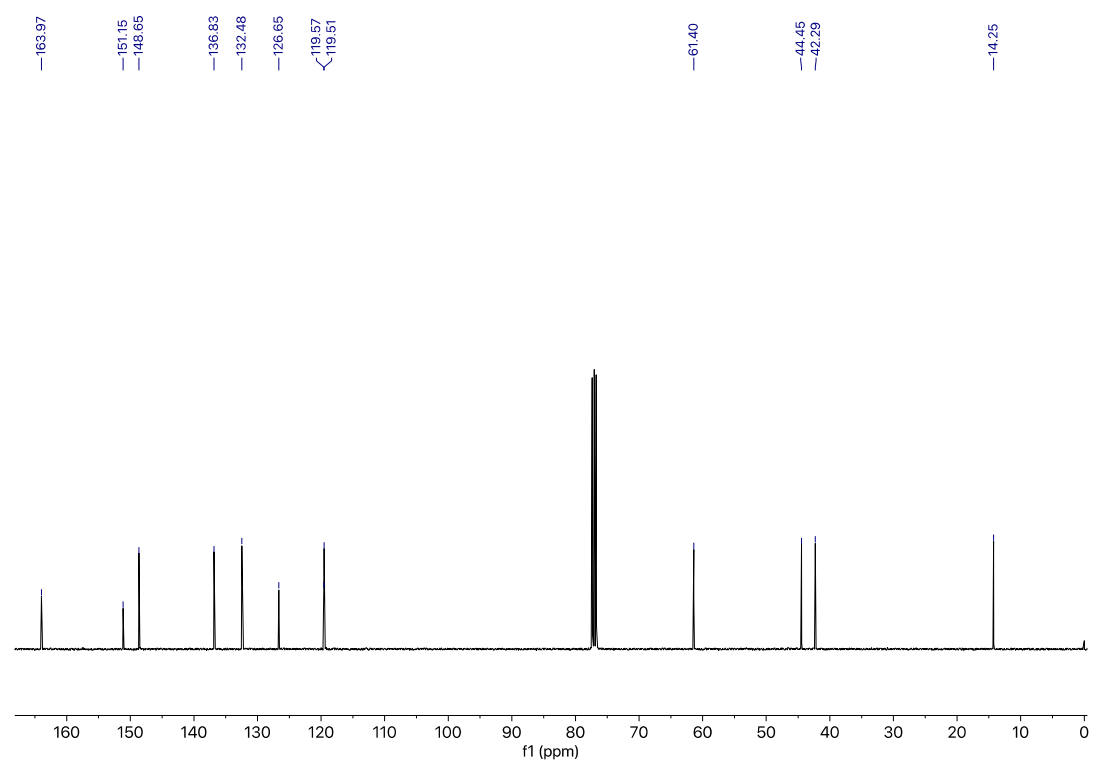



**<sup>1</sup>H NMR of 1-(methylsulfonyl)-6-nitro-1,2-dihydronaphthalene-3-carbonitrile (34)**

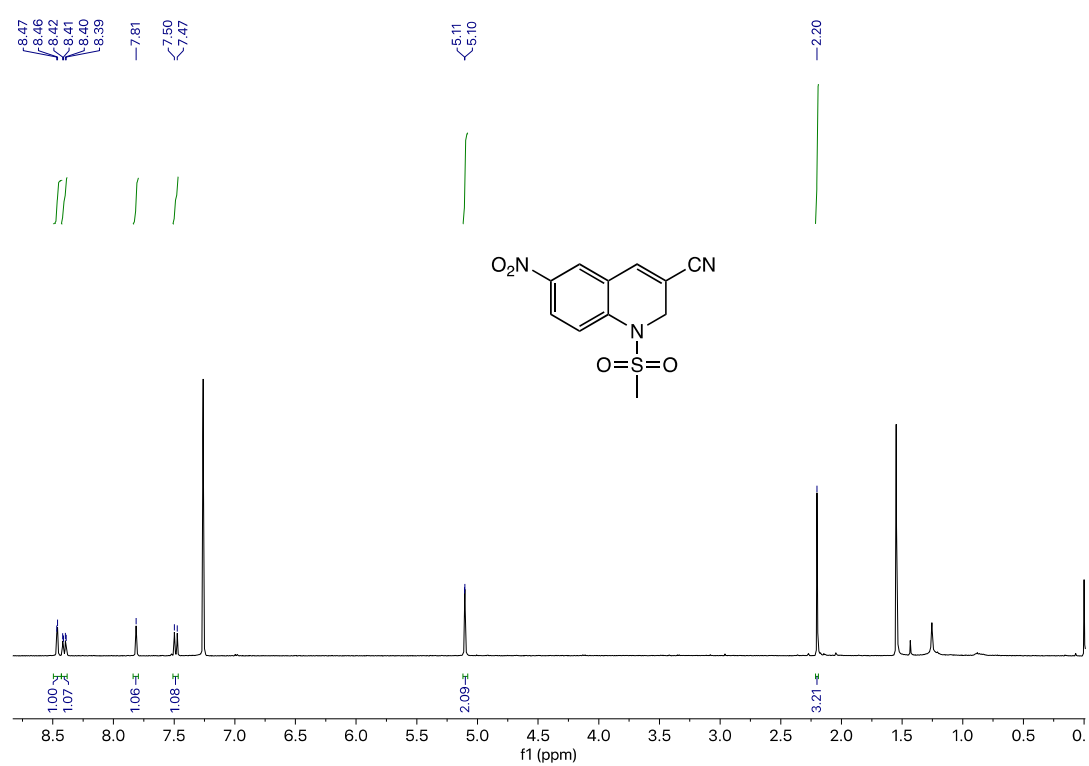

**<sup>13</sup>C NMR of 1-(methylsulfonyl)-6-nitro-1,2-dihydronaphthalene-3-carbonitrile (34)**

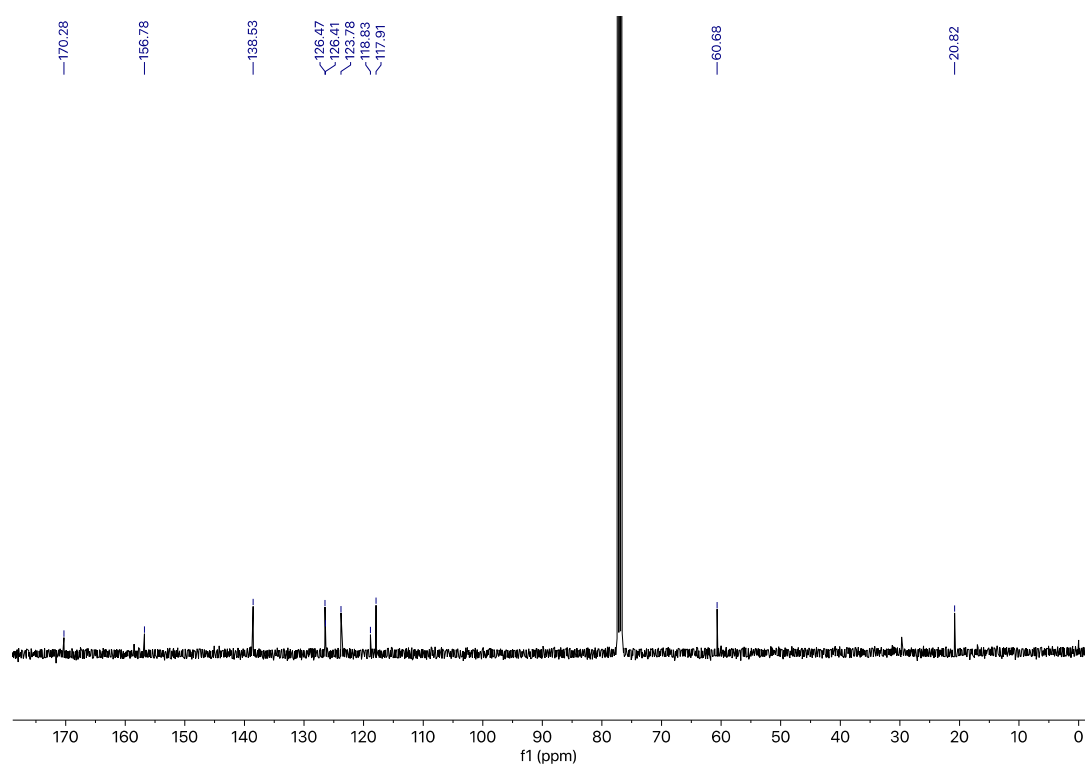

**<sup>1</sup>H NMR for 1-(1-(methylsulfonyl)-6-nitro-1,2-dihydroquinolin-3-yl)ethan-1-one (38)**

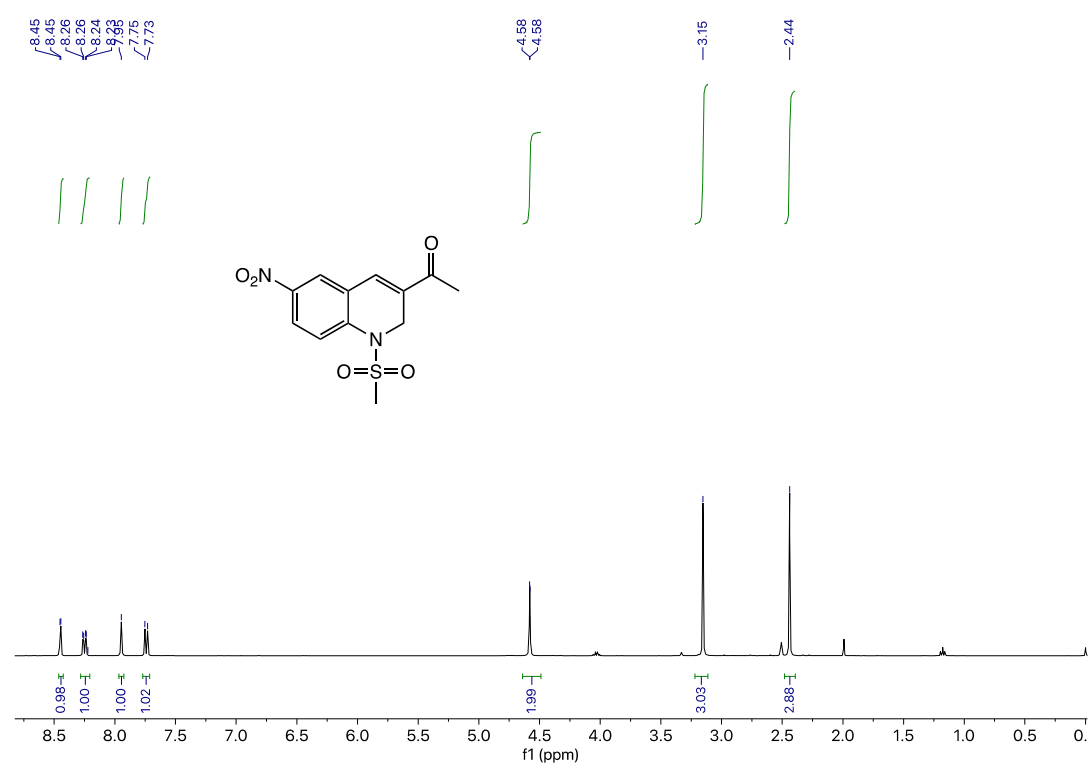

**<sup>13</sup>C NMR for 1-(1-(methylsulfonyl)-6-nitro-1,2-dihydroquinolin-3-yl)ethan-1-one (38)**

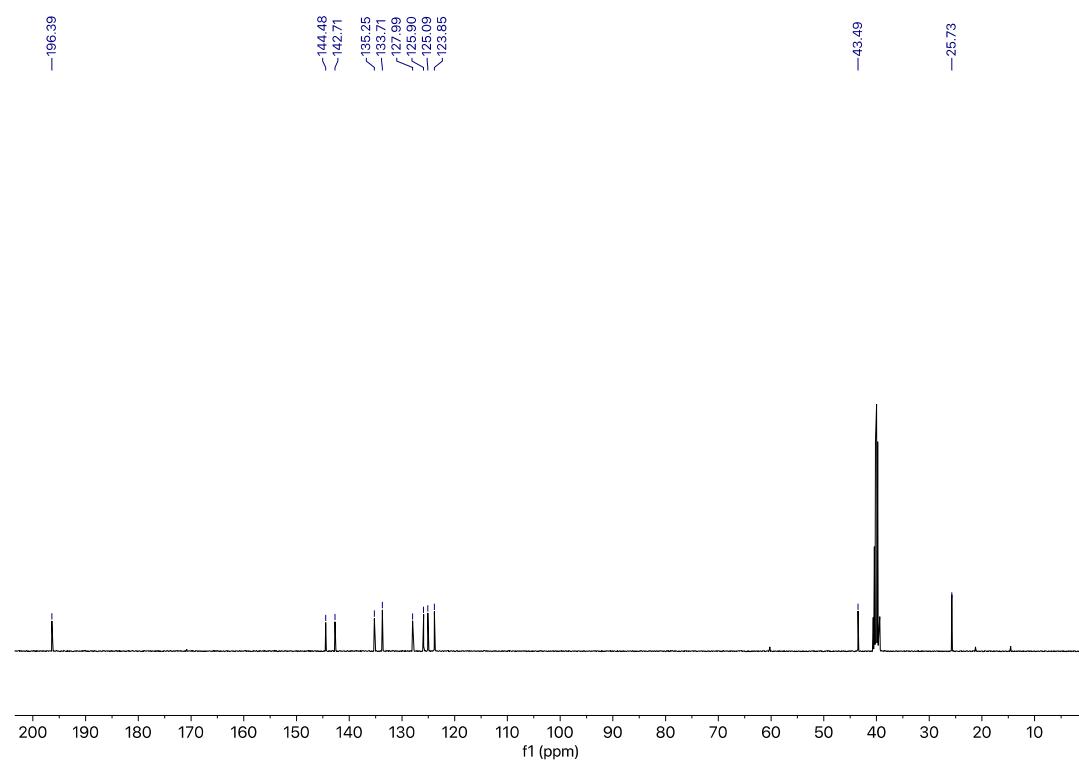

<sup>1</sup>H NMR of 3-acetyl-1-(methylsulfonyl)-1,2-dihydroquinoline-6-carbonitrile (39)

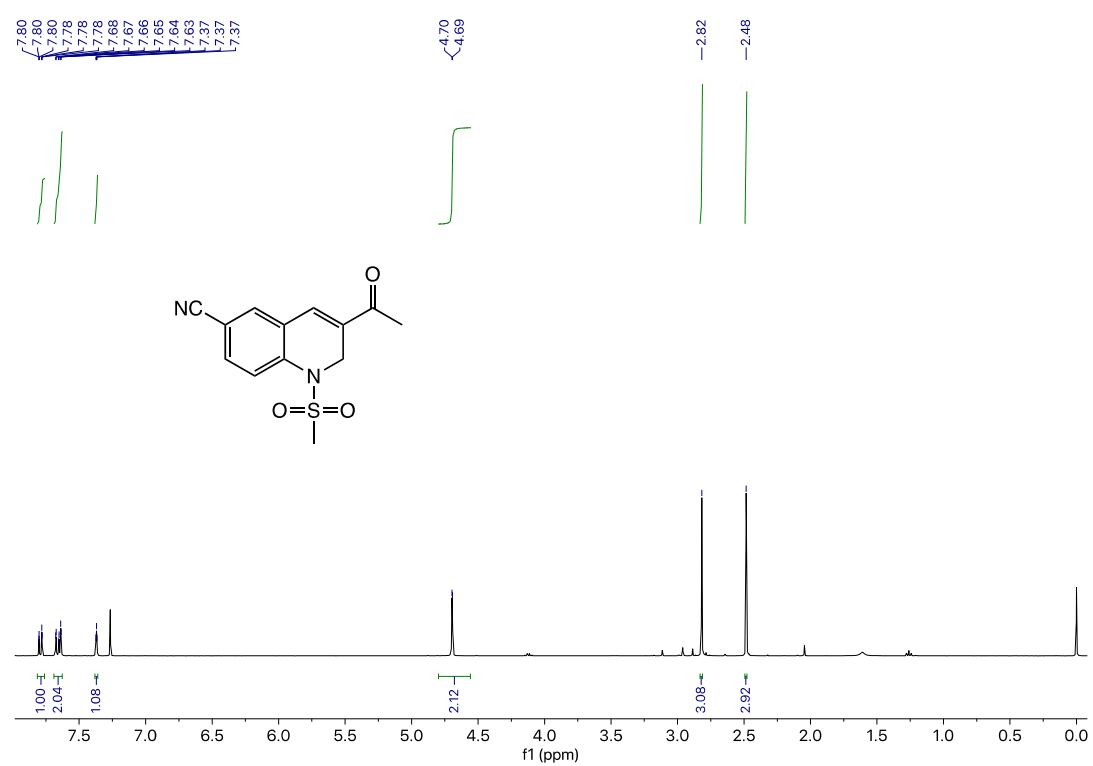

<sup>13</sup>C NMR of 3-acetyl-1-(methylsulfonyl)-1,2-dihydroquinoline-6-carbonitrile (39)

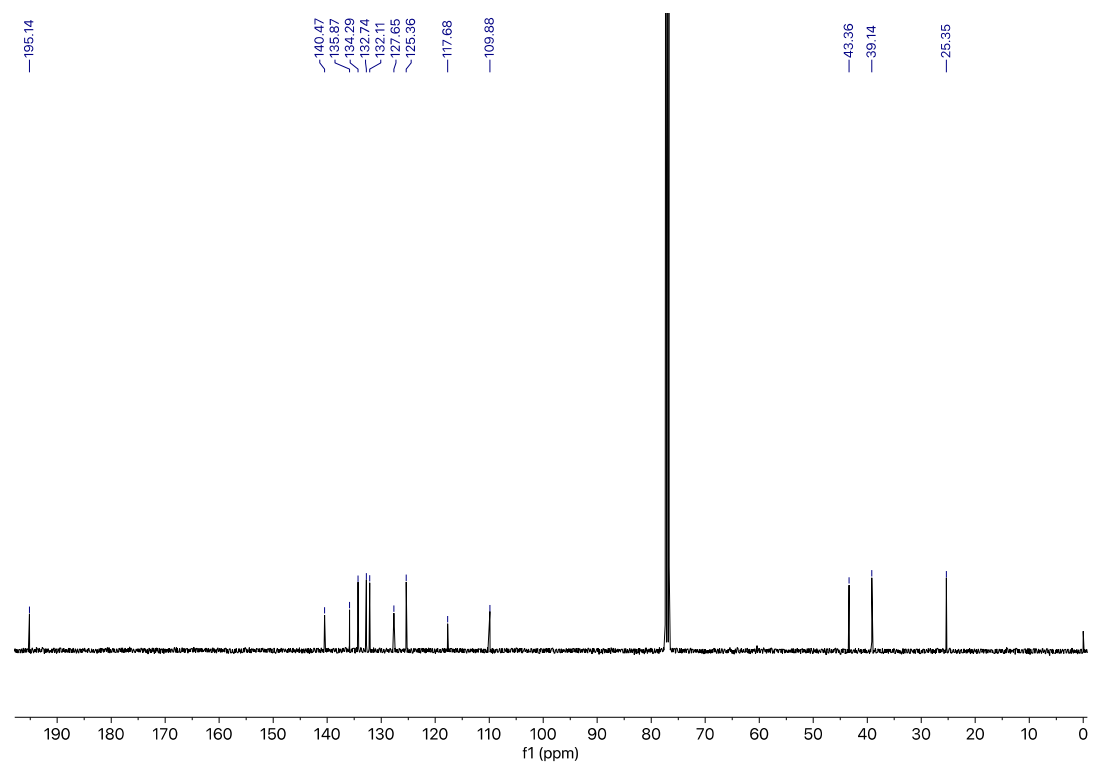

<sup>1</sup>H NMR for 1-(1-(methylsulfonyl)-6-(trifluoromethyl)-1,2-dihydroquinolin-3-yl)ethan-1-one (40)

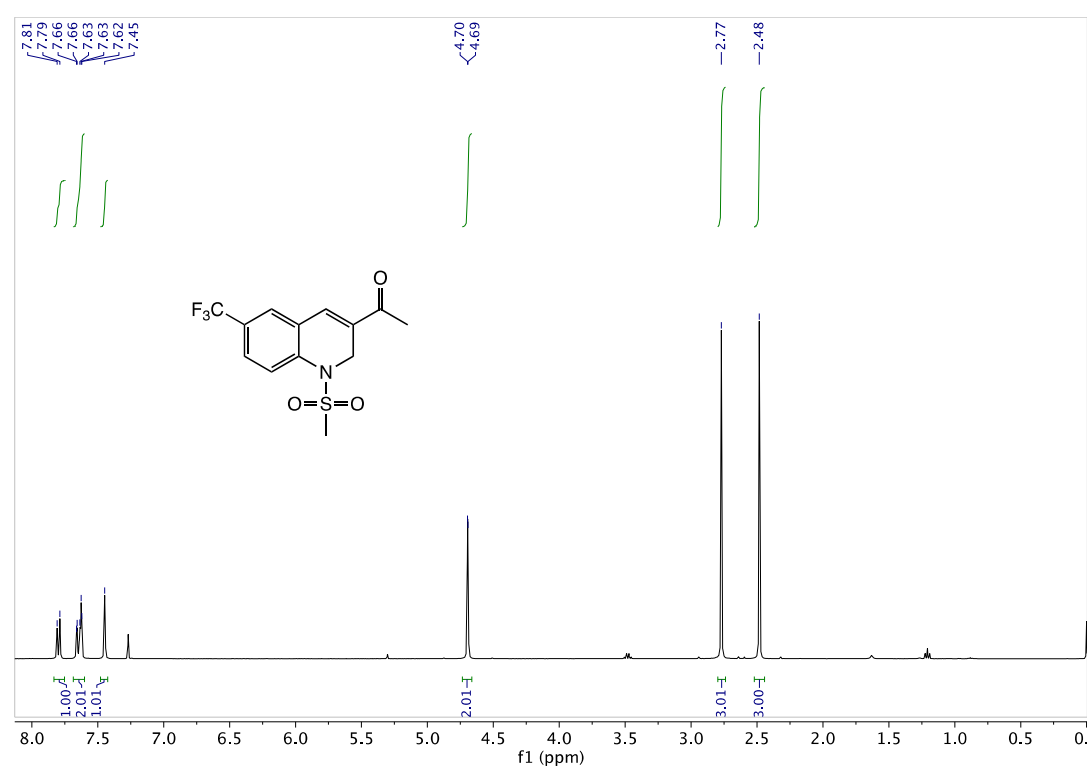

<sup>13</sup>C NMR for 1-(1-(methylsulfonyl)-6-(trifluoromethyl)-1,2-dihydroquinolin-3-yl)ethan-1-one (40)

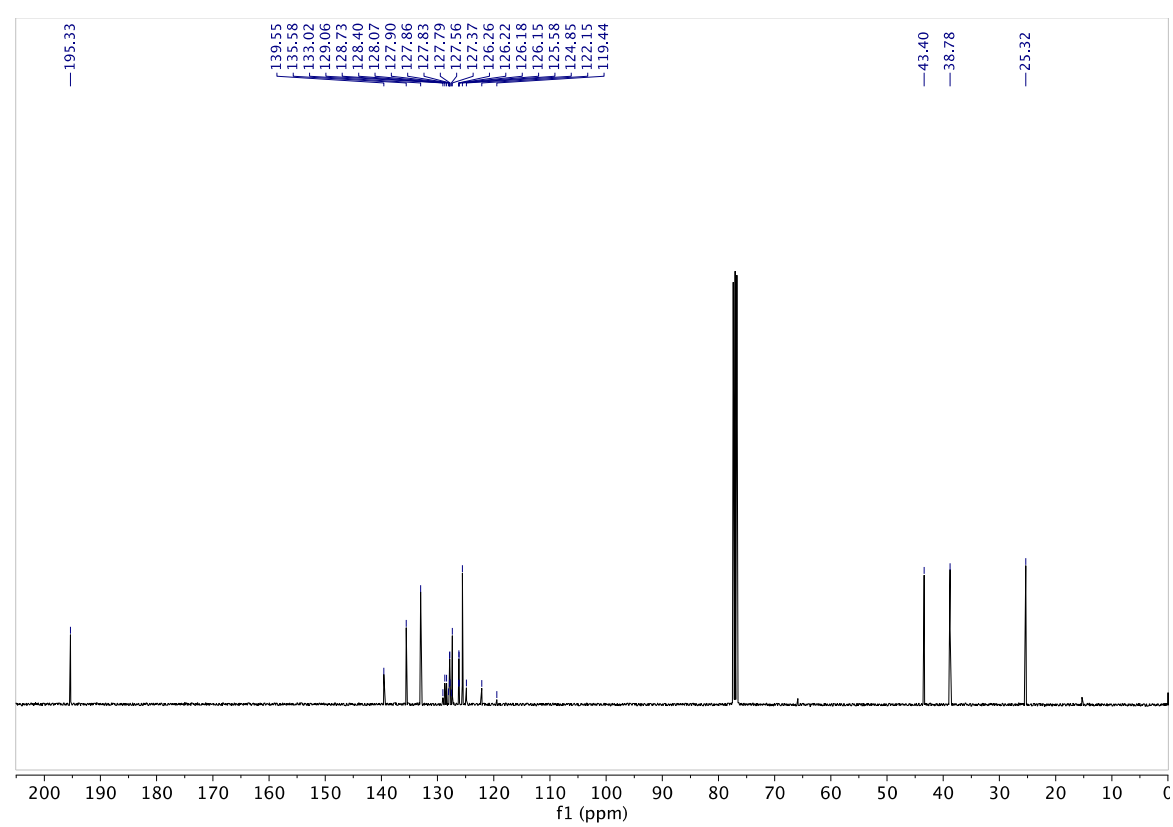

<sup>1</sup>H NMR of 1-(6,7-difluoro-1-(methylsulfonyl)-1,2-dihydroquinolin-3-yl)ethan-1-one (41)

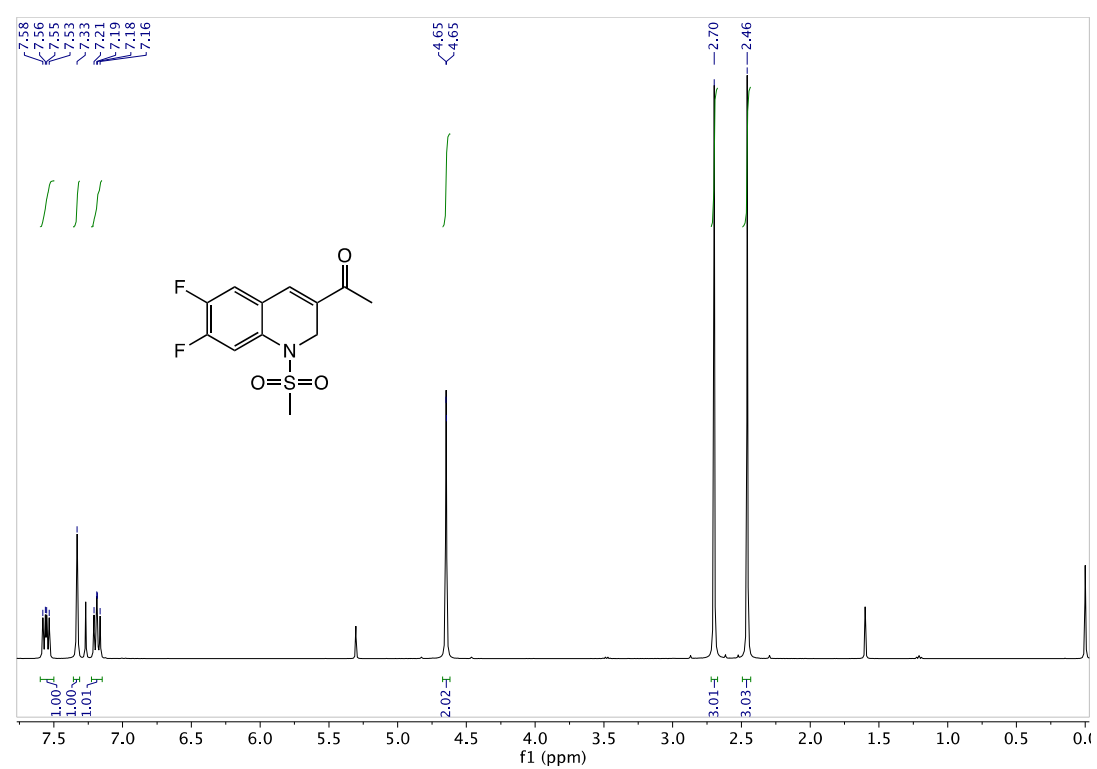

<sup>13</sup>C NMR of 1-(6,7-difluoro-1-(methylsulfonyl)-1,2-dihydroquinolin-3-yl)ethan-1-one (41)

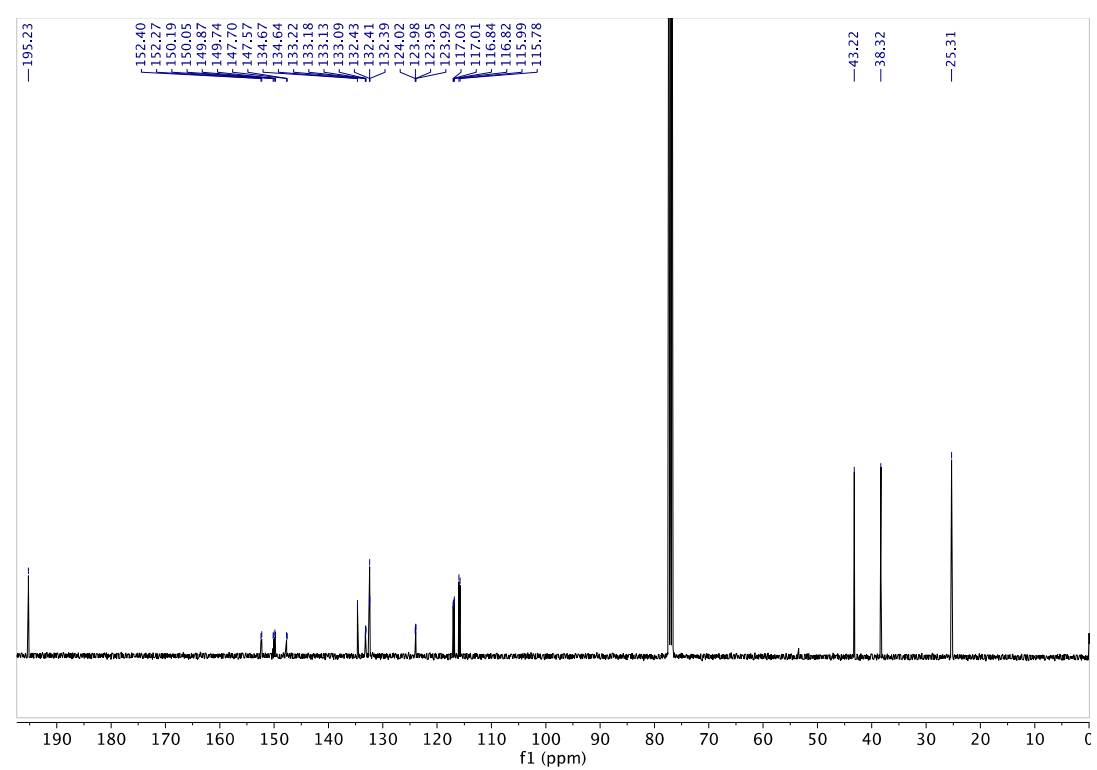

<sup>1</sup>H for 1-(1-(methylsulfonyl)-1,2-dihydro-1,8-naphthyridin-3-yl)ethan-1-one (42)

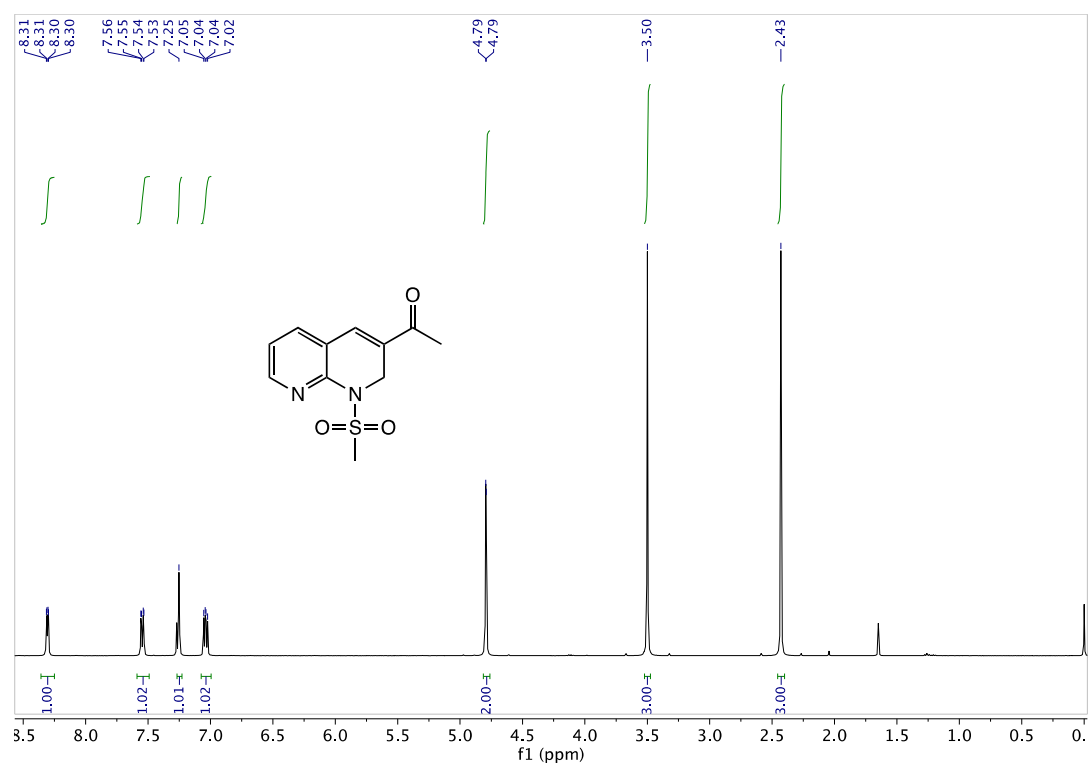

<sup>13</sup>C for 1-(1-(methylsulfonyl)-1,2-dihydro-1,8-naphthyridin-3-yl)ethan-1-one (42)

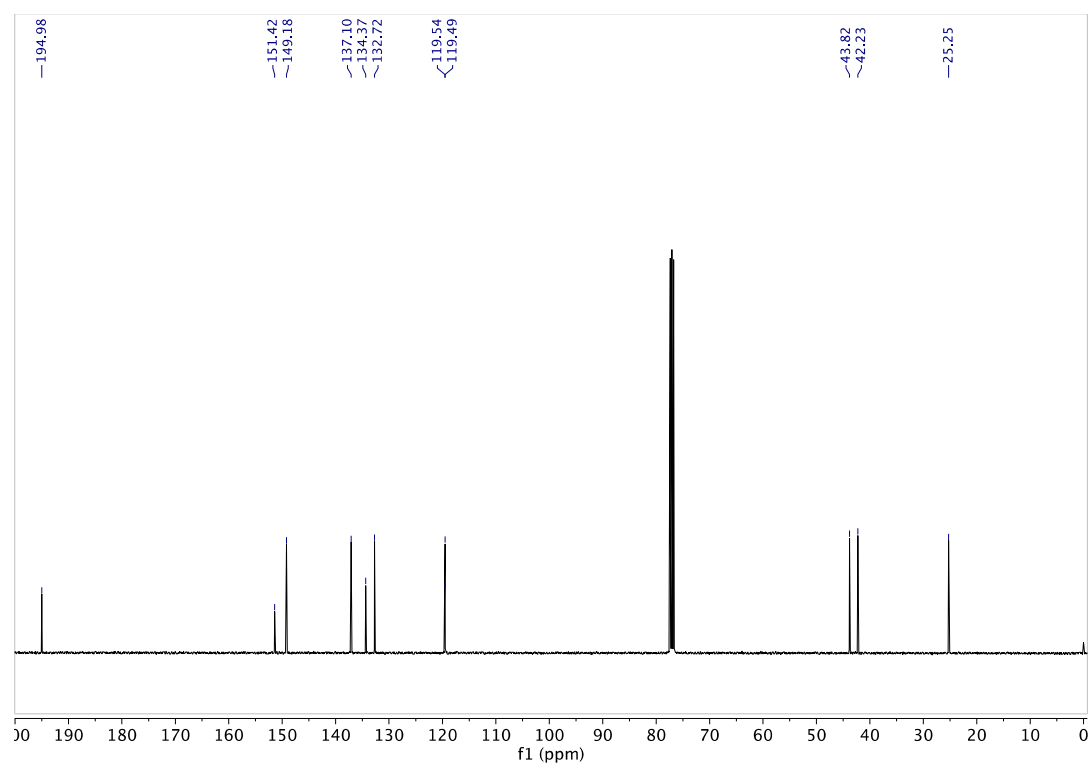

**<sup>1</sup>H NMR of ethyl 6-nitroquinoline-3-carboxylate (43 from 28-Ms)**

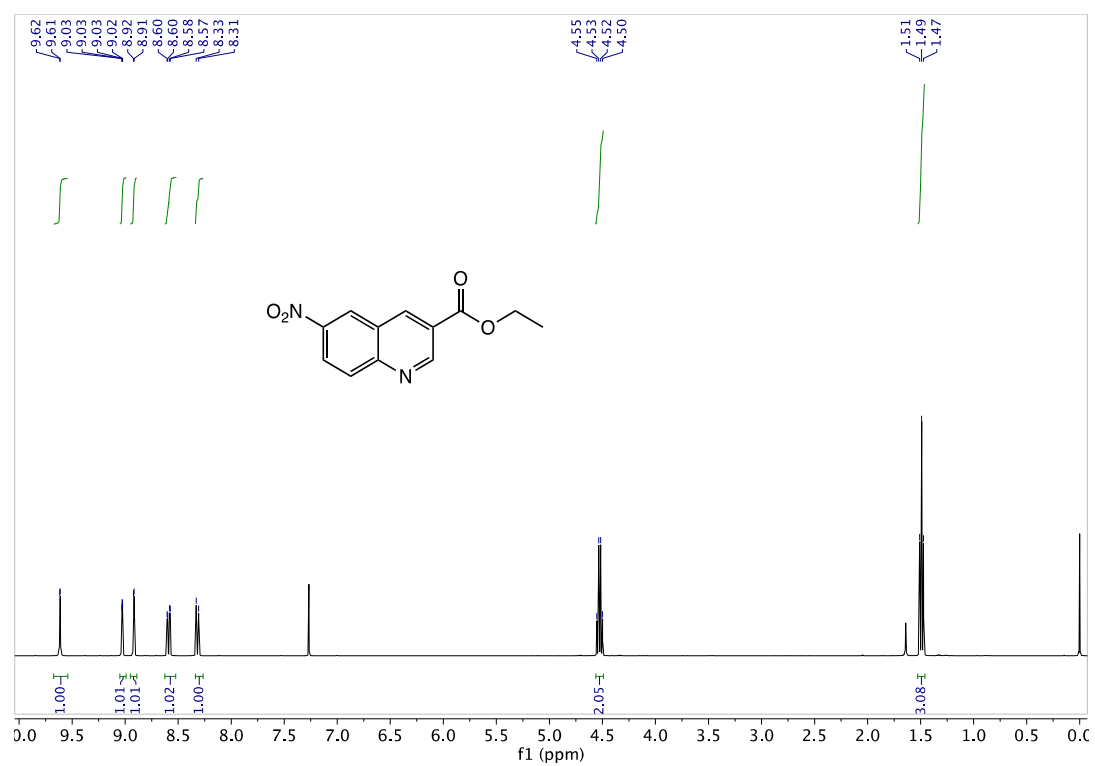

**<sup>13</sup>C for ethyl 6-nitroquinoline-3-carboxylate (43 from 28-Ms)**

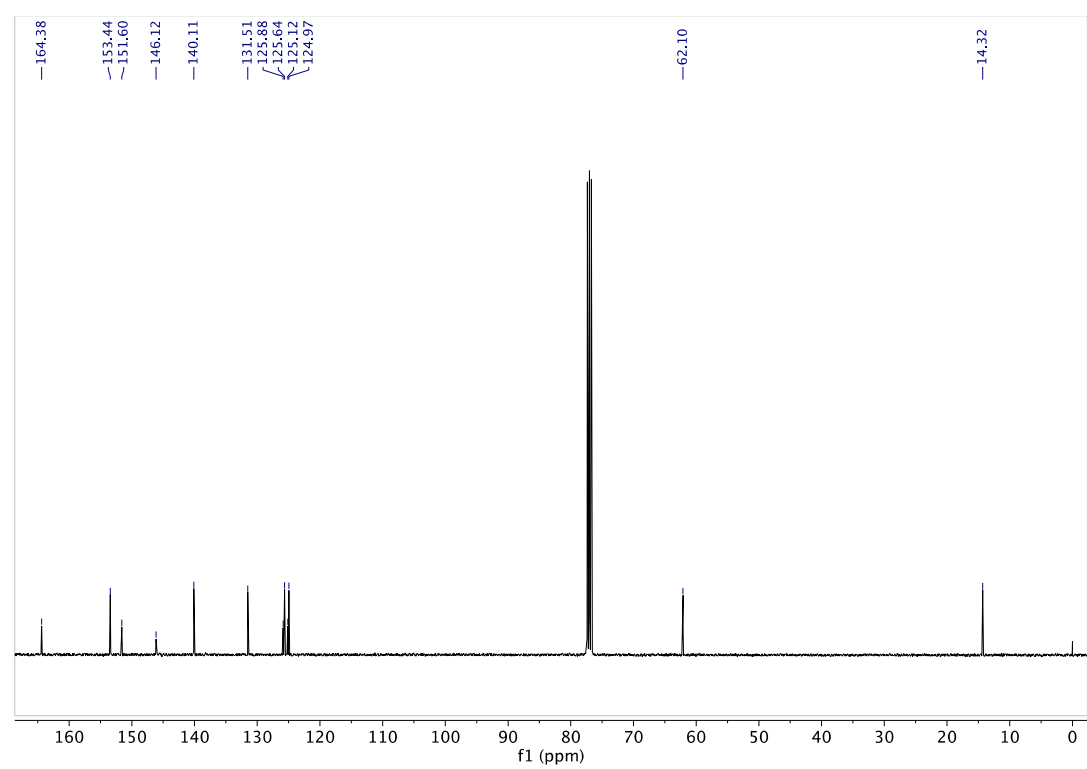

<sup>1</sup>H NMR for ethyl 6-nitroquinoline-3-carboxylate (43 from 37-Ts)

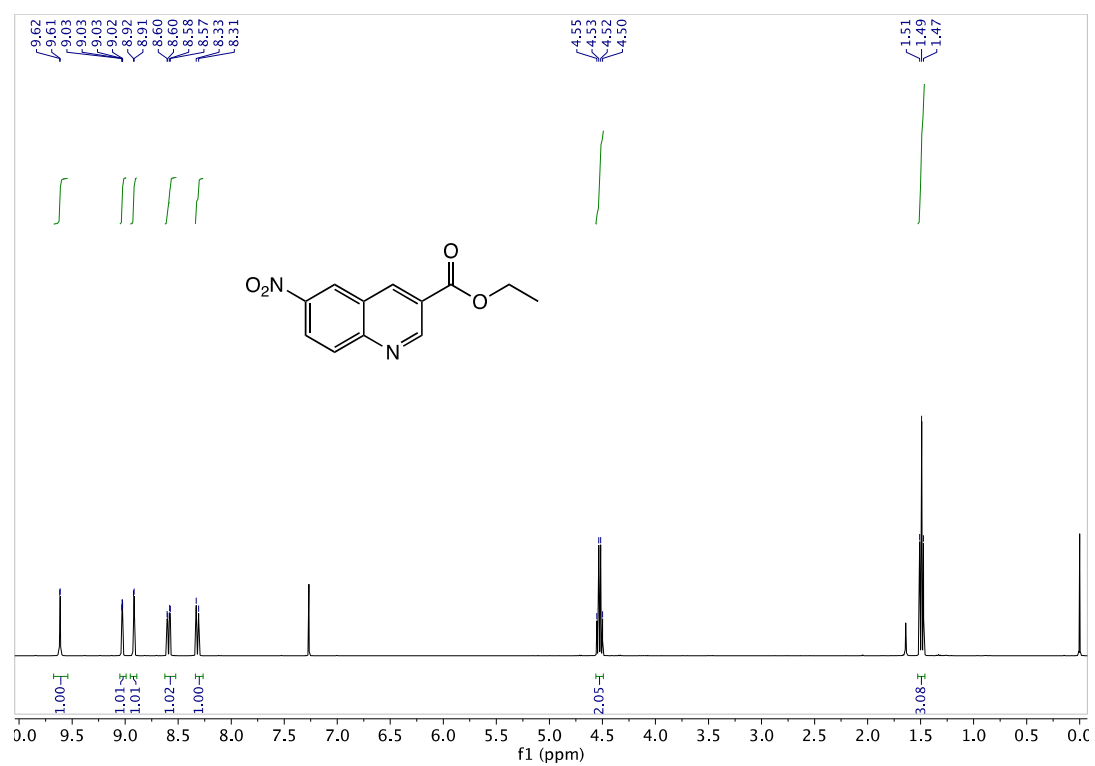

<sup>13</sup>C NMR of ethyl 6-nitroquinoline-3-carboxylate (43 from 37-Ts)

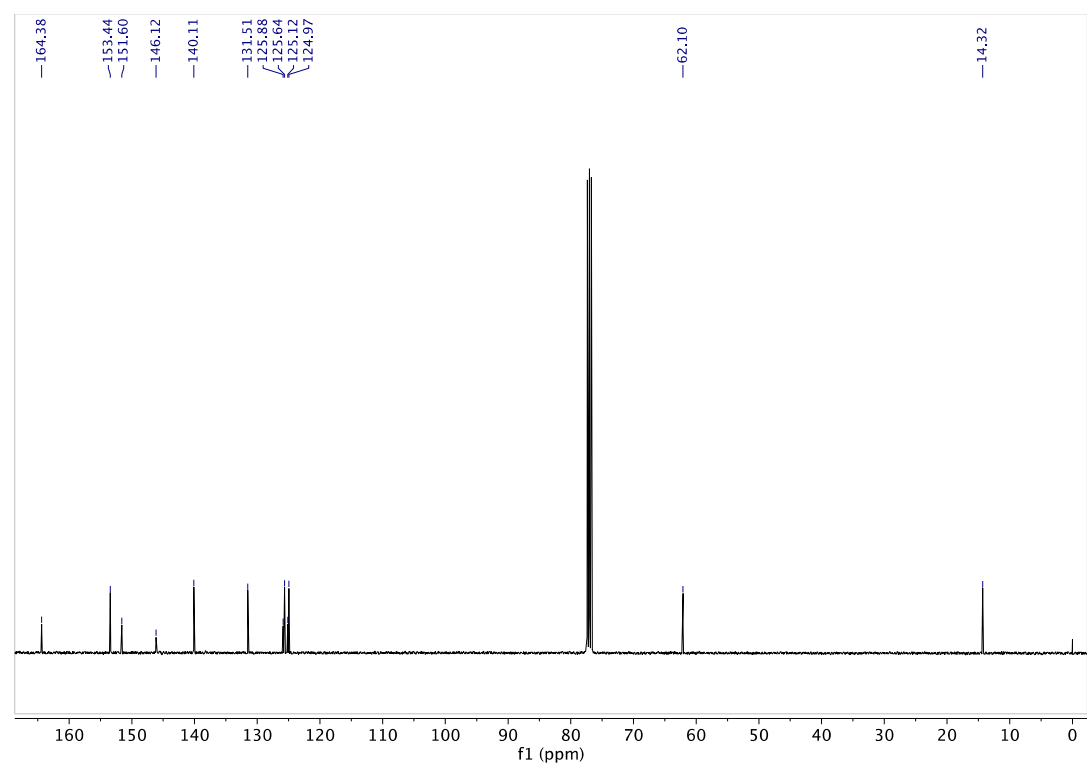



<sup>1</sup>H NMR for ethyl 6-cyanoquinoline-3-carboxylate (44)

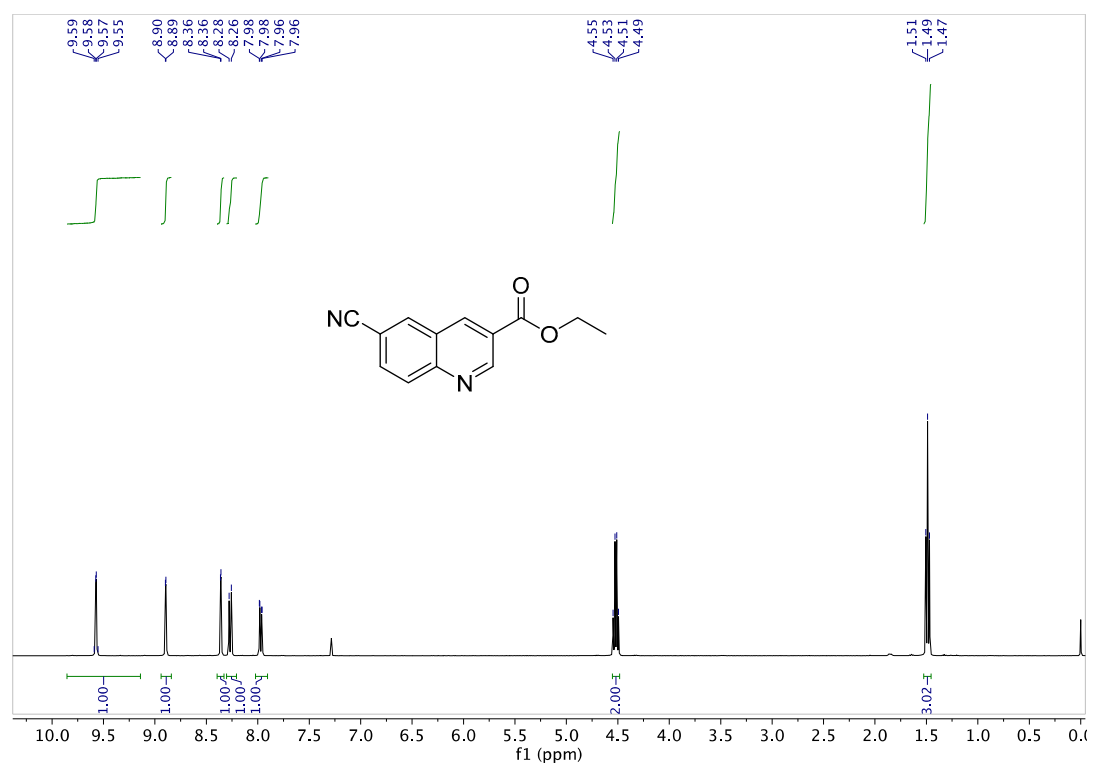

<sup>13</sup>C NMR for ethyl 6-isocyanoquinoline-3-carboxylate (44)

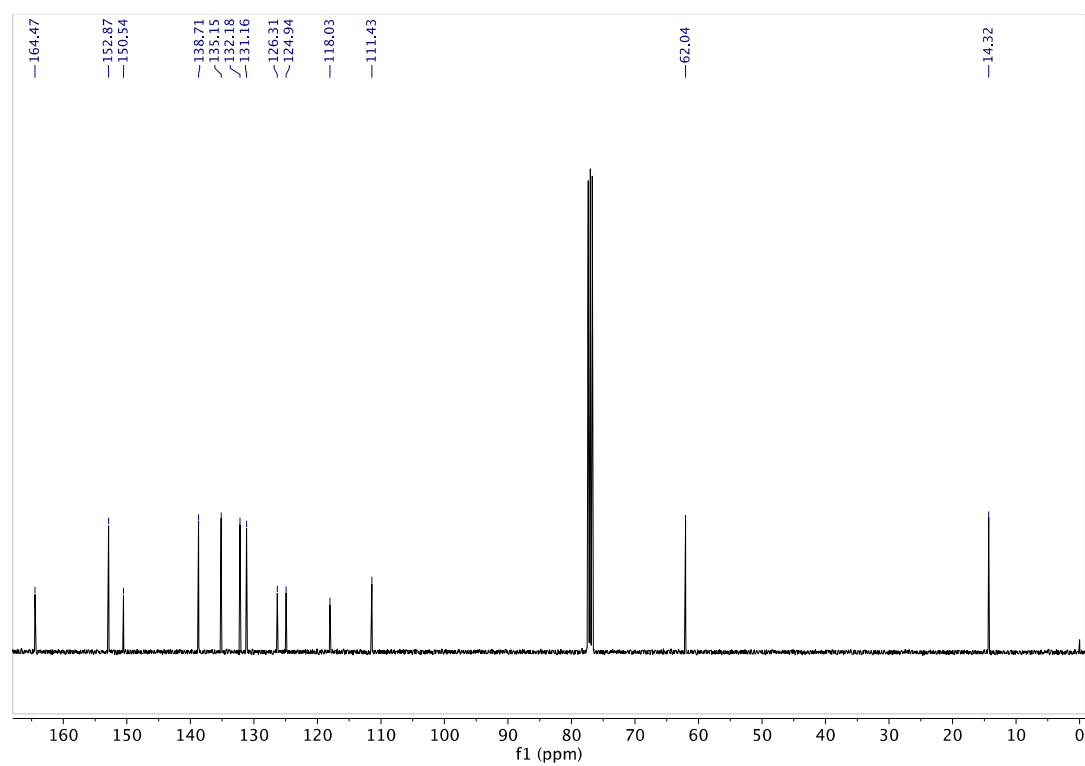

<sup>1</sup>H NMR for ethyl 6-(trifluoromethyl)quinoline-3-carboxylate (45)

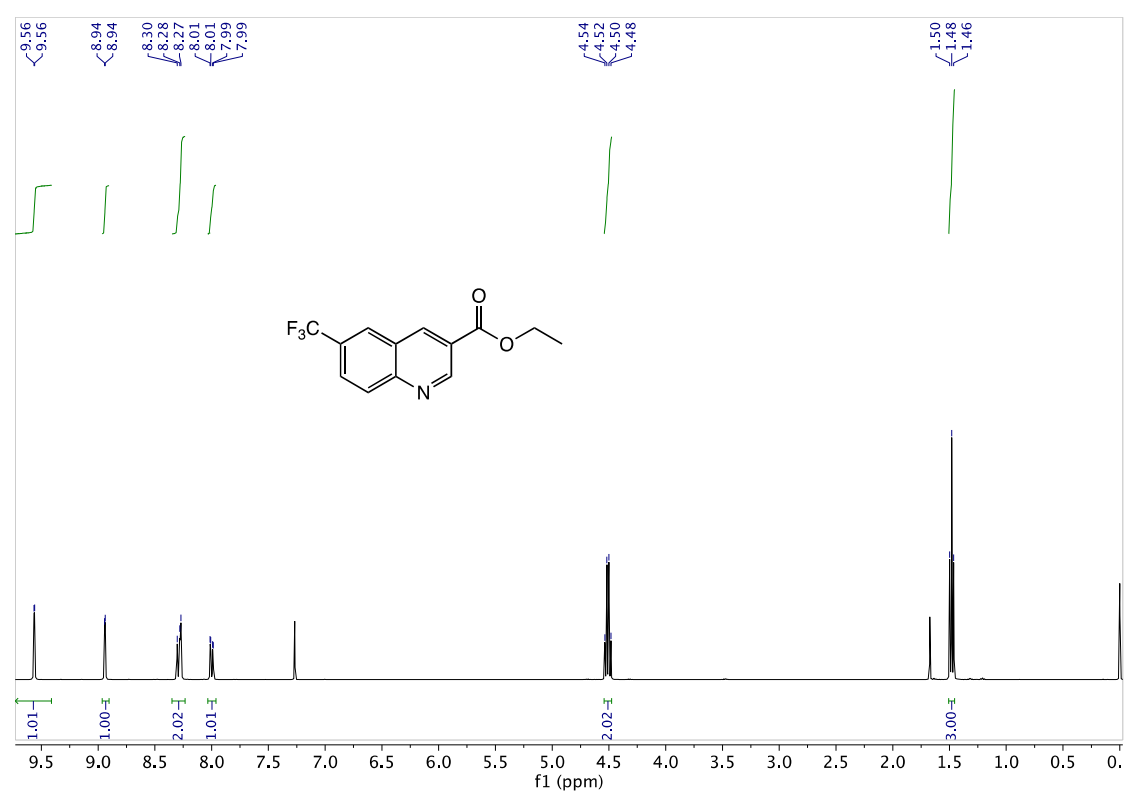

<sup>13</sup>C NMR for ethyl 6-(trifluoromethyl)quinoline-3-carboxylate (45)

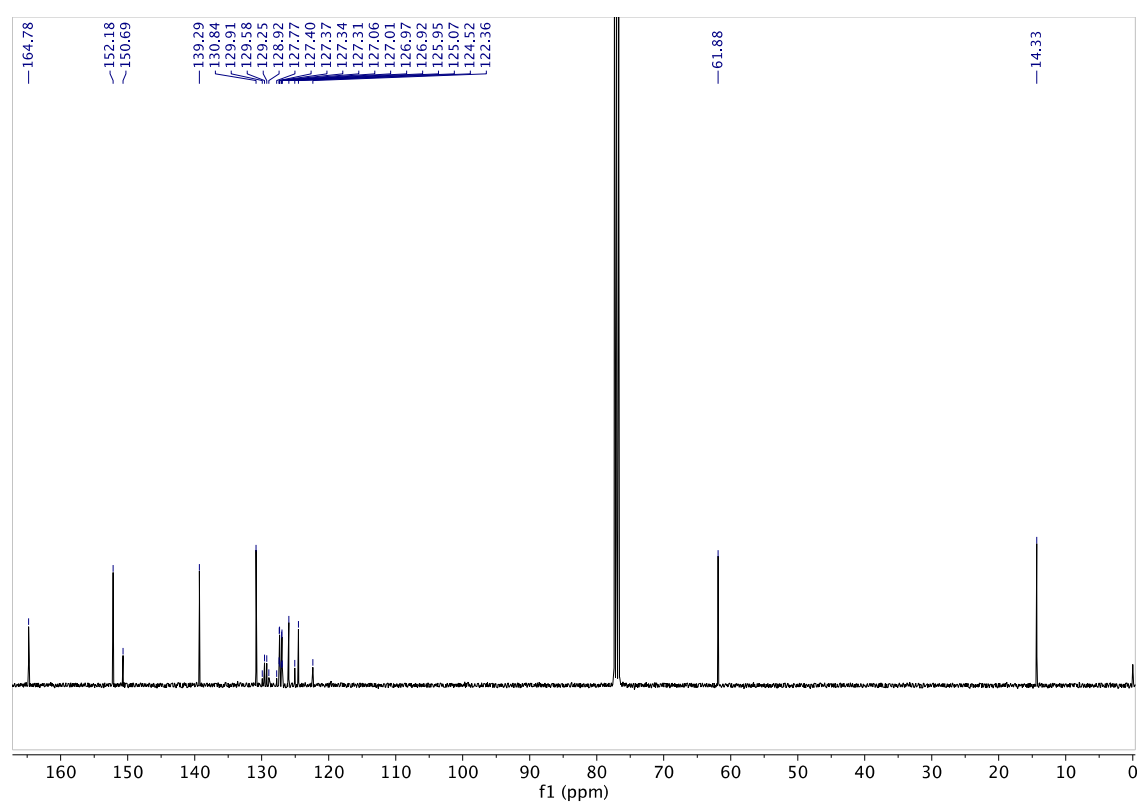

<sup>1</sup>H NMR for ethyl 6-chloroquinoline-3-carboxylate (46)

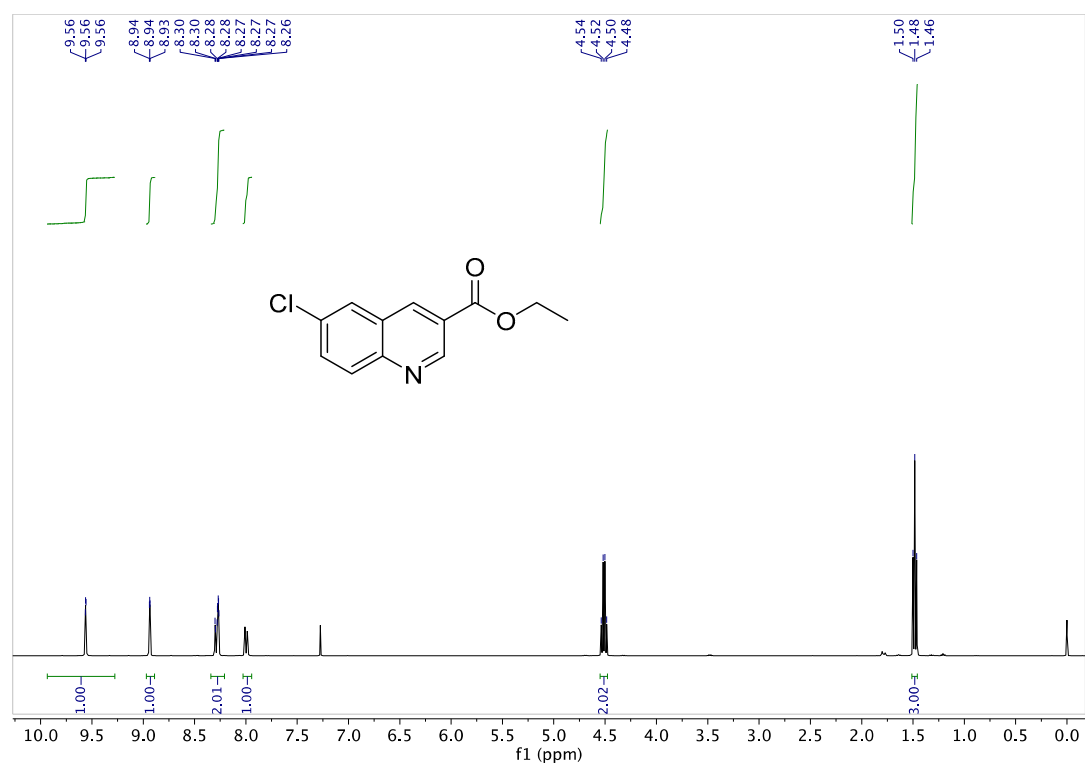

<sup>13</sup>C NMR for ethyl 6-chloroquinoline-3-carboxylate (46)

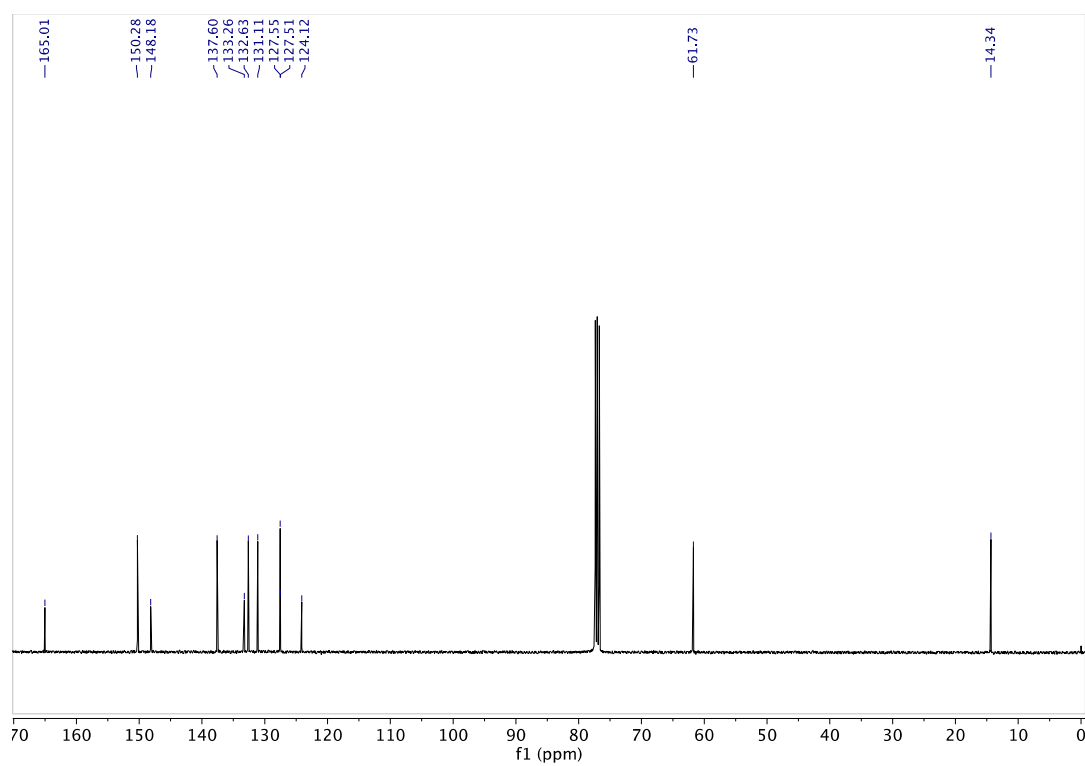

<sup>1</sup>H NMR for 6-nitroquinoline-3-carbonitrile (48)

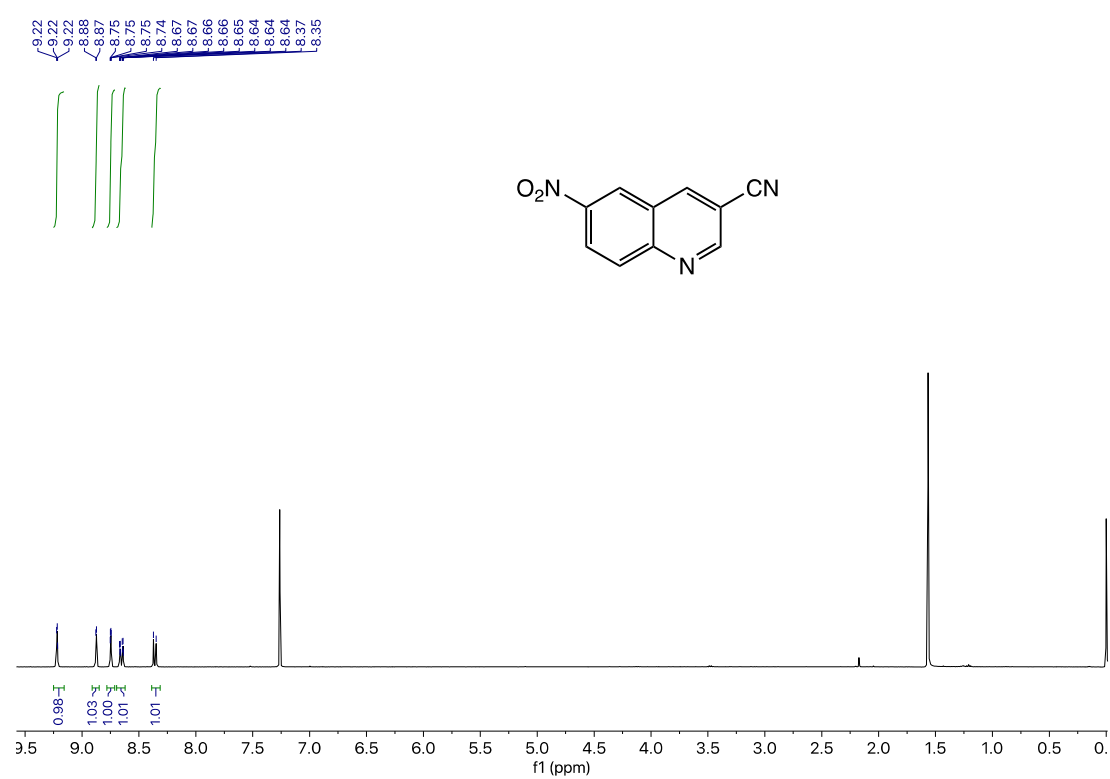

<sup>13</sup>C NMR for 6-nitroquinoline-3-carbonitrile (48)

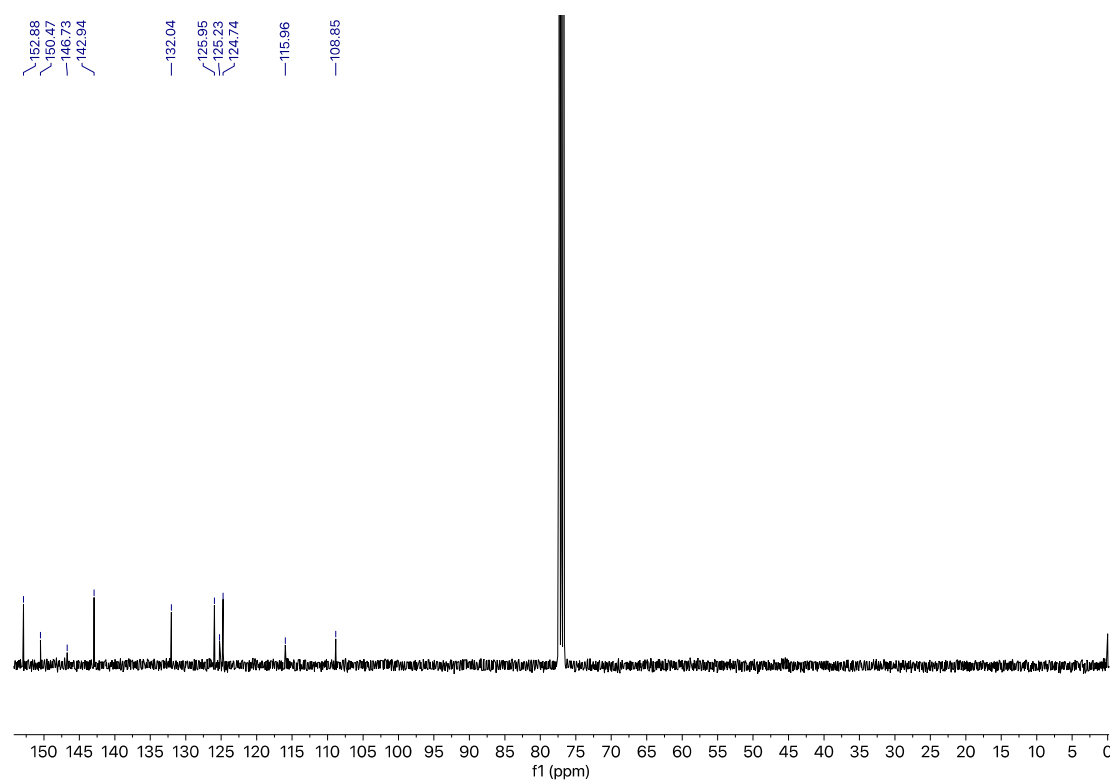

<sup>1</sup>H NMR for ethyl 7-(methylsulfonyl)-6-(phenethylamino)quinoline-3-carboxylate (49)

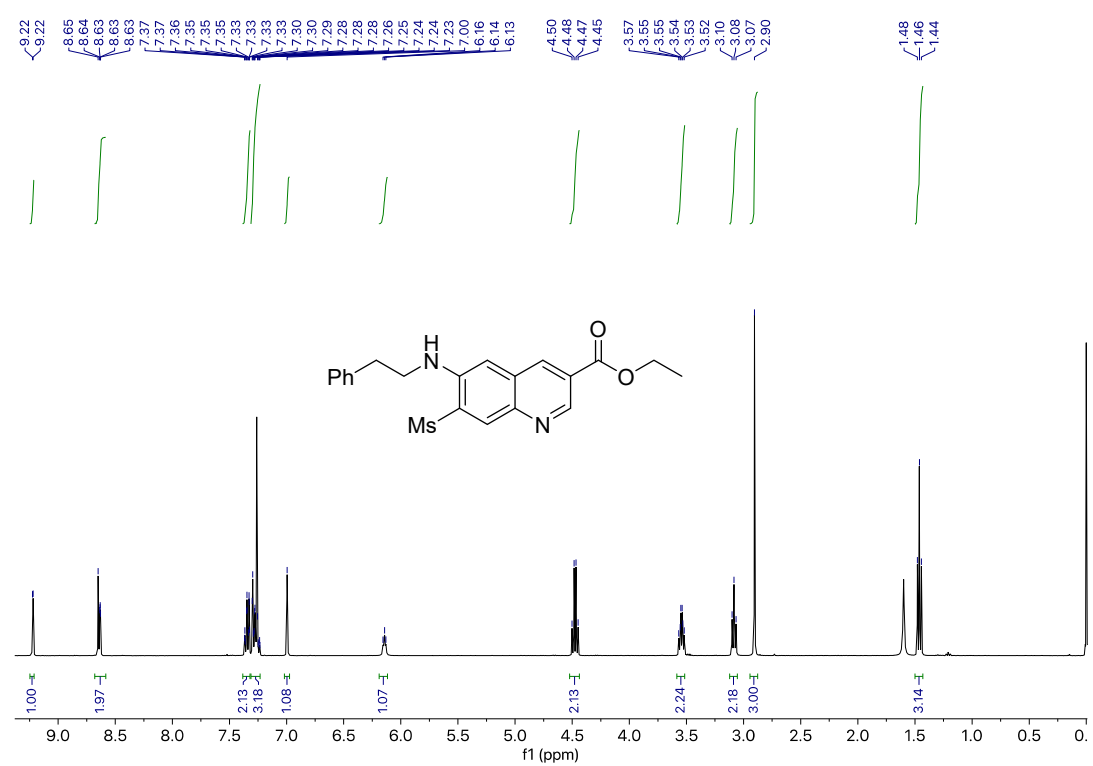

**<sup>13</sup>C NMR for ethyl 7-(methylsulfonyl)-6-(phenethylamino)quinoline-3-carboxylate (49)**

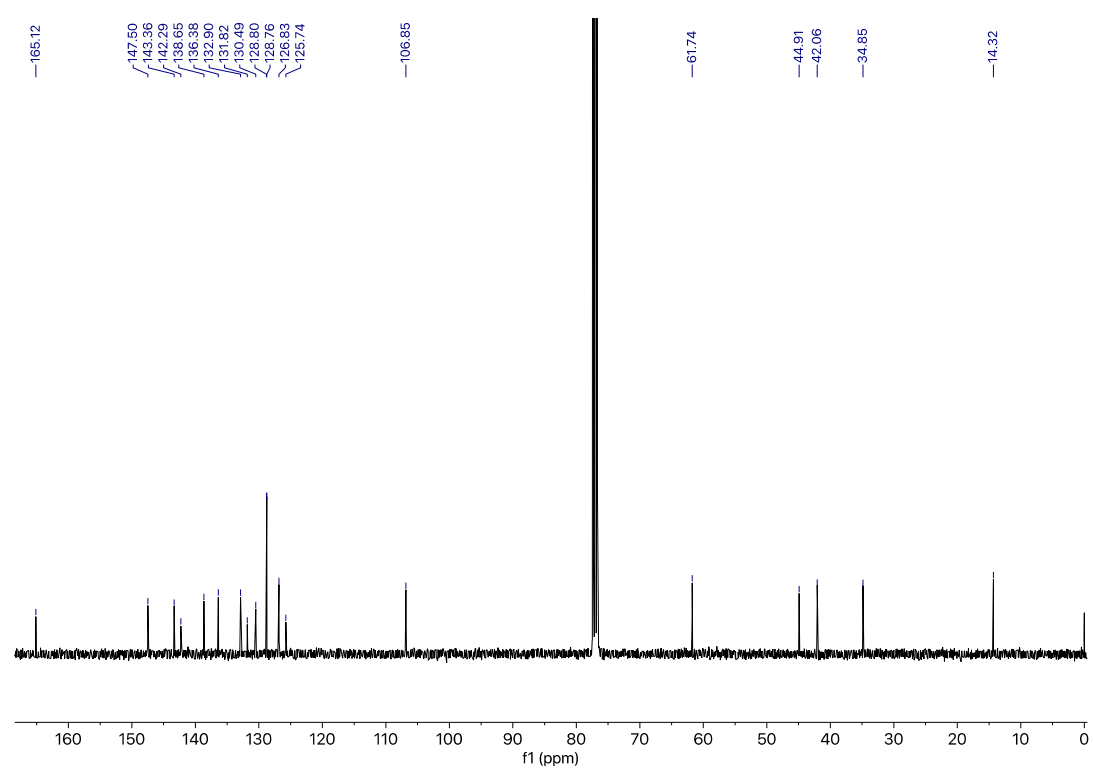

**X-Ray Structure  
Determination for  
Compound 49  
(CCDC 2246638)**

**Thermal Ellipsoid Plot Structure**

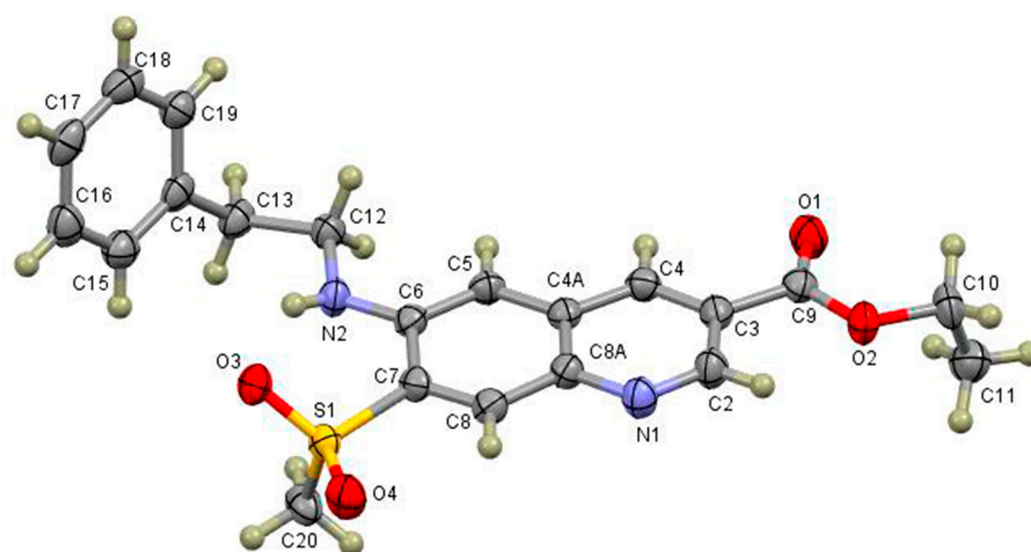

# Packing Diagram

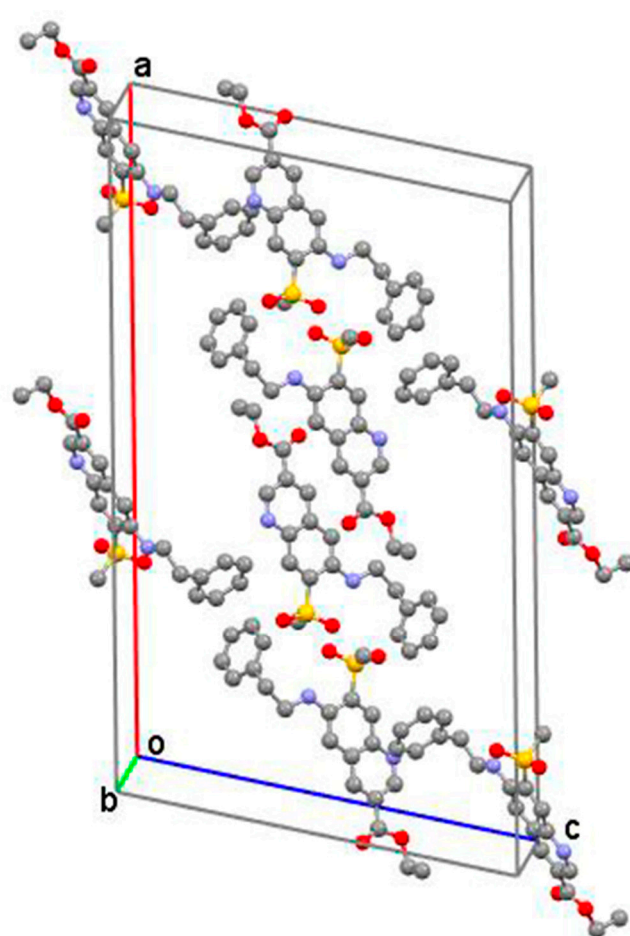

## Comment

The displacement ellipsoids were drawn at the 50% probability level.

## Experimental

A green, needle-shaped crystal of dimensions 0.046 x 0.122 x 0.252 mm was selected for structural analysis. Intensity data for this compound were collected using a D8 Quest  $\kappa$ -geometry diffractometer with a Bruker Photon II cmos area detector (1,2) and an Incoatec I $\mu$ s microfocus Mo K $\alpha$  source ( $\lambda = 0.71073$  Å). The sample was cooled to 100(2) K. Cell parameters were determined from a least-squares fit of 9733 peaks in the range  $2.36 < \theta < 25.63^\circ$ . A total of 72607 data were measured in the range  $2.364 < \theta < 25.719^\circ$  using  $\phi$  and  $\omega$  oscillation frames. The data were corrected for absorption by the empirical method (3) giving minimum and maximum transmission factors of 0.6364 and 0.6831. The data were merged to form a set of 3639 independent data with  $R(\text{int}) = 0.0998$  and a coverage of 99.9 %.

The monoclinic space group  $C2/c$  was determined by systematic absences and statistical tests and verified by subsequent refinement. The structure was solved by dual-space methods and refined by full-matrix least-squares methods on  $F^2$  (4,5). The positions of hydrogens bonded to carbons were initially determined by geometry and were refined using a riding model. The hydrogen bonded to N1 was located on a difference map, and its position was refined independently. Non-hydrogen atoms were refined with anisotropic displacement parameters. Hydrogen atom displacement parameters were set to 1.2 (1.5 for methyl) times the isotropic equivalent displacement parameters of the bonded atoms. A total of 259 parameters were refined against 3639 data to give  $wR(F^2) = 0.1036$  and  $S = 1.006$  for weights of  $w = 1/[\sigma^2(F^2) + (0.0600 P)^2 + 4.5000 P]$  where  $P = [F_o^2 + 2F_c^2] / 3$ .

The final  $R(F)$  was 0.0361 for the 3315 observed,  $[F > 4\sigma(F)]$ , data. The largest shift/s.u. was 0.001 in the final refinement cycle. The final difference map had maxima and minima of 0.435 and -0.418 e/Å<sup>3</sup>, respectively.



## Acknowledgment

The authors thank the National Science Foundation (grant CHE-1726630) and the University of Oklahoma for funds to purchase of the X-ray instrument and computers. This structure was determined by Douglas R. Powell.

## References

1. Data Collection: APEX3 (2018) Bruker Inc., Madison, Wisconsin, USA.
2. Data Reduction: SAINT (2016) Bruker Inc., Madison, Wisconsin, USA.
3. L. Krause, R. Herbst-Irmer, G. M. Sheldrick, and D. Stalke (2015). *J. Appl. Cryst.*, **48**, 3-10.
4. G. M. Sheldrick (2015). *Acta Cryst.*, **A71**, 3-8.
5. G. M. Sheldrick (2015). *Acta Cryst.*, **C71**, 3-8.

Table 1. Crystal data and structure refinement for Compound **49** (CCDC 2246638)

|                                    |                                                                                                                                                             |
|------------------------------------|-------------------------------------------------------------------------------------------------------------------------------------------------------------|
| Empirical formula                  | C <sub>21</sub> H <sub>22</sub> N <sub>2</sub> O <sub>4</sub> S                                                                                             |
| Formula weight                     | 398.46                                                                                                                                                      |
| Crystal system                     | monoclinic                                                                                                                                                  |
| Space group                        | C2/c                                                                                                                                                        |
| Unit cell dimensions               | $a = 34.920(5) \text{ \AA}$ $\alpha = 90^\circ$<br>$b = 5.4677(6) \text{ \AA}$ $\beta = 99.312(5)^\circ$<br>$c = 20.235(3) \text{ \AA}$ $\gamma = 90^\circ$ |
| Volume                             | 3812.6(9) $\text{\AA}^3$                                                                                                                                    |
| Z, Z'                              | 8, 1                                                                                                                                                        |
| Density (calculated)               | 1.388 Mg/m <sup>3</sup>                                                                                                                                     |
| Wavelength                         | 0.71073 $\text{\AA}$                                                                                                                                        |
| Temperature                        | 100(2) K                                                                                                                                                    |
| $F(000)$                           | 1680                                                                                                                                                        |
| Absorption coefficient             | 0.201 mm <sup>-1</sup>                                                                                                                                      |
| Absorption correction              | semi-empirical from equivalents                                                                                                                             |
| Max. and min. transmission         | 0.6831 and 0.6364                                                                                                                                           |
| Theta range for data collection    | 2.364 to 25.719°                                                                                                                                            |
| Reflections collected              | 72607                                                                                                                                                       |
| Independent reflections            | 3639 [R(int) = 0.0998]                                                                                                                                      |
| Data / restraints / parameters     | 3639 / 0 / 259                                                                                                                                              |
| $wR(F^2 \text{ all data})$         | $wR2 = 0.1036$                                                                                                                                              |
| $R(F \text{ obsd data})$           | $R1 = 0.0361$                                                                                                                                               |
| Goodness-of-fit on $F^2$           | 1.006                                                                                                                                                       |
| Observed data [ $I > 2\sigma(I)$ ] | 3315                                                                                                                                                        |
| Extinction coefficient             | 0.0025(4)                                                                                                                                                   |
| Largest and mean shift / s.u.      | 0.001 and 0.000                                                                                                                                             |
| Largest diff. peak and hole        | 0.435 and -0.418 e/ $\text{\AA}^3$                                                                                                                          |

-----  
 $wR2 = \{ \sum [w(F_o^2 - F_c^2)^2] / \sum [w(F_o^2)^2] \}^{1/2}$   
 $R1 = \sum ||F_o| - |F_c|| / \sum |F_o|$

Table 2. Atomic coordinates and equivalent isotropic displacement parameters for Cpd 49. U(eq) is defined as one third of the trace of the orthogonalized  $U_{ij}$  tensor.

|       | x          | y          | z          | U(eq)       |
|-------|------------|------------|------------|-------------|
| S(1)  | 0.68967(2) | 0.24226(6) | 0.53419(2) | 0.01600(14) |
| O(1)  | 0.46496(3) | 0.8793(2)  | 0.58153(5) | 0.0251(3)   |
| O(2)  | 0.46690(3) | 0.5995(2)  | 0.66407(5) | 0.0208(3)   |
| O(3)  | 0.69712(3) | 0.1987(2)  | 0.46689(5) | 0.0216(3)   |
| O(4)  | 0.69527(3) | 0.0419(2)  | 0.58111(5) | 0.0246(3)   |
| N(1)  | 0.56424(4) | 0.2675(2)  | 0.62832(7) | 0.0206(3)   |
| N(2)  | 0.64874(4) | 0.6195(2)  | 0.43607(6) | 0.0187(3)   |
| C(2)  | 0.53159(4) | 0.3758(3)  | 0.63601(7) | 0.0203(3)   |
| C(3)  | 0.51615(4) | 0.5829(3)  | 0.59856(7) | 0.0179(3)   |
| C(4)  | 0.53526(4) | 0.6757(3)  | 0.55001(7) | 0.0172(3)   |
| C(4A) | 0.57054(4) | 0.5639(3)  | 0.53930(7) | 0.0161(3)   |
| C(5)  | 0.59186(4) | 0.6482(3)  | 0.49020(7) | 0.0173(3)   |
| C(6)  | 0.62715(4) | 0.5420(3)  | 0.48305(7) | 0.0160(3)   |
| C(7)  | 0.64155(4) | 0.3511(3)  | 0.52960(7) | 0.0162(3)   |
| C(8)  | 0.62036(4) | 0.2597(3)  | 0.57509(7) | 0.0174(3)   |
| C(8A) | 0.58384(4) | 0.3613(3)  | 0.58077(7) | 0.0168(3)   |
| C(9)  | 0.48005(4) | 0.7058(3)  | 0.61223(7) | 0.0178(3)   |
| C(10) | 0.43305(4) | 0.7103(3)  | 0.68561(8) | 0.0234(3)   |
| C(11) | 0.44433(5) | 0.9253(3)  | 0.73100(8) | 0.0269(4)   |
| C(12) | 0.63417(4) | 0.8055(3)  | 0.38724(7) | 0.0179(3)   |
| C(13) | 0.66405(4) | 0.8629(3)  | 0.34205(7) | 0.0198(3)   |
| C(14) | 0.67456(4) | 0.6479(3)  | 0.30159(7) | 0.0185(3)   |
| C(15) | 0.70996(4) | 0.5272(3)  | 0.31898(7) | 0.0216(3)   |
| C(16) | 0.71995(5) | 0.3308(3)  | 0.28129(8) | 0.0235(3)   |
| C(17) | 0.69441(5) | 0.2507(3)  | 0.22566(8) | 0.0232(4)   |
| C(18) | 0.65909(5) | 0.3692(3)  | 0.20788(7) | 0.0232(3)   |
| C(19) | 0.64938(4) | 0.5665(3)  | 0.24508(7) | 0.0206(3)   |
| C(20) | 0.71853(4) | 0.4897(3)  | 0.56756(8) | 0.0217(3)   |

Table 3. Bond lengths [Å] and angles [°] for Cpd 49.

|                  |            |                  |            |
|------------------|------------|------------------|------------|
| S(1)-O(4)        | 1.4421(11) | C(10)-C(11)      | 1.505(2)   |
| S(1)-O(3)        | 1.4468(11) | C(10)-H(10A)     | 0.9900     |
| S(1)-C(20)       | 1.7553(16) | C(10)-H(10B)     | 0.9900     |
| S(1)-C(7)        | 1.7709(14) | C(11)-H(11A)     | 0.9800     |
| O(1)-C(9)        | 1.2071(19) | C(11)-H(11B)     | 0.9800     |
| O(2)-C(9)        | 1.3436(18) | C(11)-H(11C)     | 0.9800     |
| O(2)-C(10)       | 1.4562(17) | C(12)-C(13)      | 1.5271(19) |
| N(1)-C(2)        | 1.316(2)   | C(12)-H(12A)     | 0.9900     |
| N(1)-C(8A)       | 1.3677(19) | C(12)-H(12B)     | 0.9900     |
| N(2)-C(6)        | 1.3725(18) | C(13)-C(14)      | 1.512(2)   |
| N(2)-C(12)       | 1.4514(19) | C(13)-H(13A)     | 0.9900     |
| N(2)-H(2N)       | 0.85(2)    | C(13)-H(13B)     | 0.9900     |
| C(2)-C(3)        | 1.419(2)   | C(14)-C(15)      | 1.395(2)   |
| C(2)-H(2)        | 0.9500     | C(14)-C(19)      | 1.398(2)   |
| C(3)-C(4)        | 1.371(2)   | C(15)-C(16)      | 1.394(2)   |
| C(3)-C(9)        | 1.493(2)   | C(15)-H(15)      | 0.9500     |
| C(4)-C(4A)       | 1.423(2)   | C(16)-C(17)      | 1.389(2)   |
| C(4)-H(4)        | 0.9500     | C(16)-H(16)      | 0.9500     |
| C(4A)-C(5)       | 1.412(2)   | C(17)-C(18)      | 1.388(2)   |
| C(4A)-C(8A)      | 1.421(2)   | C(17)-H(17)      | 0.9500     |
| C(5)-C(6)        | 1.391(2)   | C(18)-C(19)      | 1.389(2)   |
| C(5)-H(5)        | 0.9500     | C(18)-H(18)      | 0.9500     |
| C(6)-C(7)        | 1.441(2)   | C(19)-H(19)      | 0.9500     |
| C(7)-C(8)        | 1.365(2)   | C(20)-H(20A)     | 0.9800     |
| C(8)-C(8A)       | 1.413(2)   | C(20)-H(20B)     | 0.9800     |
| C(8)-H(8)        | 0.9500     | C(20)-H(20C)     | 0.9800     |
| O(4)-S(1)-O(3)   | 117.96(7)  | C(4)-C(3)-C(9)   | 119.32(13) |
| O(4)-S(1)-C(20)  | 108.90(7)  | C(2)-C(3)-C(9)   | 121.28(13) |
| O(3)-S(1)-C(20)  | 108.03(7)  | C(3)-C(4)-C(4A)  | 118.96(14) |
| O(4)-S(1)-C(7)   | 108.43(7)  | C(3)-C(4)-H(4)   | 120.5      |
| O(3)-S(1)-C(7)   | 108.63(6)  | C(4A)-C(4)-H(4)  | 120.5      |
| C(20)-S(1)-C(7)  | 104.00(7)  | C(5)-C(4A)-C(8A) | 120.71(13) |
| C(9)-O(2)-C(10)  | 116.76(12) | C(5)-C(4A)-C(4)  | 122.35(13) |
| C(2)-N(1)-C(8A)  | 117.12(13) | C(8A)-C(4A)-C(4) | 116.94(13) |
| C(6)-N(2)-C(12)  | 121.10(12) | C(6)-C(5)-C(4A)  | 120.92(13) |
| C(6)-N(2)-H(2N)  | 112.7(12)  | C(6)-C(5)-H(5)   | 119.5      |
| C(12)-N(2)-H(2N) | 119.8(12)  | C(4A)-C(5)-H(5)  | 119.5      |
| N(1)-C(2)-C(3)   | 123.87(14) | N(2)-C(6)-C(5)   | 122.57(13) |
| N(1)-C(2)-H(2)   | 118.1      | N(2)-C(6)-C(7)   | 120.24(13) |
| C(3)-C(2)-H(2)   | 118.1      | C(5)-C(6)-C(7)   | 117.12(13) |
| C(4)-C(3)-C(2)   | 119.38(13) | C(8)-C(7)-C(6)   | 122.39(13) |

|                     |            |                     |            |
|---------------------|------------|---------------------|------------|
| C(8)-C(7)-S(1)      | 117.06(11) | C(14)-C(13)-H(13A)  | 108.6      |
| C(6)-C(7)-S(1)      | 120.37(11) | C(12)-C(13)-H(13A)  | 108.6      |
| C(7)-C(8)-C(8A)     | 120.39(13) | C(14)-C(13)-H(13B)  | 108.6      |
| C(7)-C(8)-H(8)      | 119.8      | C(12)-C(13)-H(13B)  | 108.6      |
| C(8A)-C(8)-H(8)     | 119.8      | H(13A)-C(13)-H(13B) | 107.6      |
| N(1)-C(8A)-C(8)     | 118.08(13) | C(15)-C(14)-C(19)   | 118.05(14) |
| N(1)-C(8A)-C(4A)    | 123.70(13) | C(15)-C(14)-C(13)   | 120.95(14) |
| C(8)-C(8A)-C(4A)    | 118.12(13) | C(19)-C(14)-C(13)   | 120.98(14) |
| O(1)-C(9)-O(2)      | 124.46(14) | C(16)-C(15)-C(14)   | 121.10(14) |
| O(1)-C(9)-C(3)      | 124.72(14) | C(16)-C(15)-H(15)   | 119.5      |
| O(2)-C(9)-C(3)      | 110.82(12) | C(14)-C(15)-H(15)   | 119.5      |
| O(2)-C(10)-C(11)    | 111.26(13) | C(17)-C(16)-C(15)   | 120.11(15) |
| O(2)-C(10)-H(10A)   | 109.4      | C(17)-C(16)-H(16)   | 119.9      |
| C(11)-C(10)-H(10A)  | 109.4      | C(15)-C(16)-H(16)   | 119.9      |
| O(2)-C(10)-H(10B)   | 109.4      | C(18)-C(17)-C(16)   | 119.32(15) |
| C(11)-C(10)-H(10B)  | 109.4      | C(18)-C(17)-H(17)   | 120.3      |
| H(10A)-C(10)-H(10B) | 108.0      | C(16)-C(17)-H(17)   | 120.3      |
| C(10)-C(11)-H(11A)  | 109.5      | C(17)-C(18)-C(19)   | 120.46(15) |
| C(10)-C(11)-H(11B)  | 109.5      | C(17)-C(18)-H(18)   | 119.8      |
| H(11A)-C(11)-H(11B) | 109.5      | C(19)-C(18)-H(18)   | 119.8      |
| C(10)-C(11)-H(11C)  | 109.5      | C(18)-C(19)-C(14)   | 120.95(15) |
| H(11A)-C(11)-H(11C) | 109.5      | C(18)-C(19)-H(19)   | 119.5      |
| H(11B)-C(11)-H(11C) | 109.5      | C(14)-C(19)-H(19)   | 119.5      |
| N(2)-C(12)-C(13)    | 110.70(12) | S(1)-C(20)-H(20A)   | 109.5      |
| N(2)-C(12)-H(12A)   | 109.5      | S(1)-C(20)-H(20B)   | 109.5      |
| C(13)-C(12)-H(12A)  | 109.5      | H(20A)-C(20)-H(20B) | 109.5      |
| N(2)-C(12)-H(12B)   | 109.5      | S(1)-C(20)-H(20C)   | 109.5      |
| C(13)-C(12)-H(12B)  | 109.5      | H(20A)-C(20)-H(20C) | 109.5      |
| H(12A)-C(12)-H(12B) | 108.1      | H(20B)-C(20)-H(20C) | 109.5      |
| C(14)-C(13)-C(12)   | 114.44(12) |                     |            |

---



Table 4. Anisotropic displacement parameters ( $\text{\AA}^2 \times 10^3$ ) for Cpd 49 The anisotropic displacement factor exponent takes the form:  
 $-2 \pi^2 [h^2 a^{*2} U_{11} + \dots + 2 h k a^* b^* U_{12}]$

|       | $U_{11}$ | $U_{22}$ | $U_{33}$ | $U_{23}$ | $U_{13}$ | $U_{12}$ |
|-------|----------|----------|----------|----------|----------|----------|
| S(1)  | 16(1)    | 15(1)    | 17(1)    | -1(1)    | 4(1)     | 4(1)     |
| O(1)  | 22(1)    | 28(1)    | 26(1)    | 5(1)     | 7(1)     | 8(1)     |
| O(2)  | 19(1)    | 23(1)    | 23(1)    | 0(1)     | 10(1)    | 3(1)     |
| O(3)  | 22(1)    | 24(1)    | 20(1)    | -6(1)    | 6(1)     | 4(1)     |
| O(4)  | 25(1)    | 22(1)    | 28(1)    | 6(1)     | 7(1)     | 9(1)     |
| N(1)  | 20(1)    | 21(1)    | 22(1)    | 4(1)     | 7(1)     | 2(1)     |
| N(2)  | 18(1)    | 21(1)    | 18(1)    | 2(1)     | 7(1)     | 4(1)     |
| C(2)  | 19(1)    | 23(1)    | 21(1)    | 3(1)     | 7(1)     | 1(1)     |
| C(3)  | 15(1)    | 21(1)    | 18(1)    | -2(1)    | 3(1)     | -1(1)    |
| C(4)  | 17(1)    | 18(1)    | 16(1)    | 0(1)     | 1(1)     | 1(1)     |
| C(4A) | 16(1)    | 17(1)    | 15(1)    | -2(1)    | 2(1)     | 0(1)     |
| C(5)  | 18(1)    | 18(1)    | 15(1)    | 3(1)     | 2(1)     | 1(1)     |
| C(6)  | 17(1)    | 17(1)    | 14(1)    | -1(1)    | 3(1)     | -1(1)    |
| C(7)  | 16(1)    | 16(1)    | 16(1)    | -3(1)    | 3(1)     | 3(1)     |
| C(8)  | 20(1)    | 16(1)    | 17(1)    | 0(1)     | 3(1)     | 2(1)     |
| C(8A) | 18(1)    | 17(1)    | 16(1)    | 0(1)     | 4(1)     | 0(1)     |
| C(9)  | 16(1)    | 20(1)    | 18(1)    | -2(1)    | 3(1)     | -1(1)    |
| C(10) | 16(1)    | 28(1)    | 28(1)    | -2(1)    | 10(1)    | 2(1)     |
| C(11) | 26(1)    | 31(1)    | 24(1)    | -3(1)    | 5(1)     | 7(1)     |
| C(12) | 17(1)    | 20(1)    | 17(1)    | 2(1)     | 4(1)     | 1(1)     |
| C(13) | 22(1)    | 21(1)    | 18(1)    | 0(1)     | 6(1)     | -4(1)    |
| C(14) | 22(1)    | 20(1)    | 16(1)    | 2(1)     | 8(1)     | -4(1)    |
| C(15) | 22(1)    | 25(1)    | 18(1)    | 2(1)     | 4(1)     | -5(1)    |
| C(16) | 22(1)    | 26(1)    | 24(1)    | 6(1)     | 8(1)     | 2(1)     |
| C(17) | 33(1)    | 19(1)    | 20(1)    | 3(1)     | 12(1)    | 0(1)     |
| C(18) | 29(1)    | 25(1)    | 16(1)    | 0(1)     | 4(1)     | -4(1)    |
| C(19) | 21(1)    | 23(1)    | 19(1)    | 3(1)     | 4(1)     | -1(1)    |
| C(20) | 18(1)    | 22(1)    | 26(1)    | -6(1)    | 3(1)     | 1(1)     |

Table 5. Hydrogen coordinates and isotropic displacement parameters for Cpd 49.

|        | x         | y        | z         | U(eq) |
|--------|-----------|----------|-----------|-------|
| H(2N)  | 0.6641(5) | 0.510(4) | 0.4260(9) | 0.022 |
| H(2)   | 0.517518  | 0.311571 | 0.668535  | 0.024 |
| H(4)   | 0.525113  | 0.812399 | 0.523937  | 0.021 |
| H(5)   | 0.581962  | 0.779337 | 0.461645  | 0.021 |
| H(8)   | 0.630239  | 0.127101 | 0.603075  | 0.021 |
| H(10A) | 0.419701  | 0.586828 | 0.709520  | 0.028 |
| H(10B) | 0.414709  | 0.764871 | 0.645836  | 0.028 |
| H(11A) | 0.454494  | 1.056325 | 0.705692  | 0.040 |
| H(11B) | 0.464343  | 0.874954 | 0.768205  | 0.040 |
| H(11C) | 0.421514  | 0.984598 | 0.748682  | 0.040 |
| H(12A) | 0.628210  | 0.956171 | 0.410745  | 0.021 |
| H(12B) | 0.609870  | 0.747482 | 0.359609  | 0.021 |
| H(13A) | 0.653766  | 0.995601 | 0.310866  | 0.024 |
| H(13B) | 0.687952  | 0.924490 | 0.370169  | 0.024 |
| H(15)  | 0.727538  | 0.579674 | 0.357153  | 0.026 |
| H(16)  | 0.744275  | 0.251698 | 0.293655  | 0.028 |
| H(17)  | 0.701050  | 0.116126 | 0.200049  | 0.028 |
| H(18)  | 0.641441  | 0.314974 | 0.169999  | 0.028 |
| H(19)  | 0.625273  | 0.647405 | 0.231926  | 0.025 |
| H(20A) | 0.745986  | 0.447716 | 0.569721  | 0.033 |
| H(20B) | 0.713330  | 0.525966 | 0.612707  | 0.033 |
| H(20C) | 0.712375  | 0.633459 | 0.538898  | 0.033 |

Table 6. Torsion angles [°] for Cpd 49.

|                       |             |                         |             |
|-----------------------|-------------|-------------------------|-------------|
| C(8A)-N(1)-C(2)-C(3)  | -0.6(2)     | C(2)-N(1)-C(8A)-C(4A)   | -1.1(2)     |
| N(1)-C(2)-C(3)-C(4)   | 1.7(2)      | C(7)-C(8)-C(8A)-N(1)    | -178.29(13) |
| N(1)-C(2)-C(3)-C(9)   | -176.63(14) | C(7)-C(8)-C(8A)-C(4A)   | -1.7(2)     |
| C(2)-C(3)-C(4)-C(4A)  | -1.1(2)     | C(5)-C(4A)-C(8A)-N(1)   | -178.67(14) |
| C(9)-C(3)-C(4)-C(4A)  | 177.30(13)  | C(4)-C(4A)-C(8A)-N(1)   | 1.6(2)      |
| C(3)-C(4)-C(4A)-C(5)  | 179.83(13)  | C(5)-C(4A)-C(8A)-C(8)   | 4.9(2)      |
| C(3)-C(4)-C(4A)-C(8A) | -0.4(2)     | C(4)-C(4A)-C(8A)-C(8)   | -174.81(13) |
| C(8A)-C(4A)-C(5)-C(6) | -2.7(2)     | C(10)-O(2)-C(9)-O(1)    | -2.6(2)     |
| C(4)-C(4A)-C(5)-C(6)  | 177.04(13)  | C(10)-O(2)-C(9)-C(3)    | 176.41(12)  |
| C(12)-N(2)-C(6)-C(5)  | -5.1(2)     | C(4)-C(3)-C(9)-O(1)     | 3.1(2)      |
| C(12)-N(2)-C(6)-C(7)  | 177.84(13)  | C(2)-C(3)-C(9)-O(1)     | -178.50(15) |
| C(4A)-C(5)-C(6)-N(2)  | -179.77(13) | C(4)-C(3)-C(9)-O(2)     | -175.93(13) |
| C(4A)-C(5)-C(6)-C(7)  | -2.6(2)     | C(2)-C(3)-C(9)-O(2)     | 2.44(19)    |
| N(2)-C(6)-C(7)-C(8)   | -176.79(14) | C(9)-O(2)-C(10)-C(11)   | -82.17(16)  |
| C(5)-C(6)-C(7)-C(8)   | 6.0(2)      | C(6)-N(2)-C(12)-C(13)   | 178.64(13)  |
| N(2)-C(6)-C(7)-S(1)   | 8.29(19)    | N(2)-C(12)-C(13)-C(14)  | 61.08(17)   |
| C(5)-C(6)-C(7)-S(1)   | -168.91(11) | C(12)-C(13)-C(14)-C(15) | -105.01(16) |
| O(4)-S(1)-C(7)-C(8)   | 8.80(13)    | C(12)-C(13)-C(14)-C(19) | 76.00(18)   |
| O(3)-S(1)-C(7)-C(8)   | 138.13(11)  | C(19)-C(14)-C(15)-C(16) | -0.1(2)     |
| C(20)-S(1)-C(7)-C(8)  | -106.99(12) | C(13)-C(14)-C(15)-C(16) | -179.16(13) |
| O(4)-S(1)-C(7)-C(6)   | -176.03(11) | C(14)-C(15)-C(16)-C(17) | -0.5(2)     |
| O(3)-S(1)-C(7)-C(6)   | -46.69(13)  | C(15)-C(16)-C(17)-C(18) | 0.5(2)      |
| C(20)-S(1)-C(7)-C(6)  | 68.19(13)   | C(16)-C(17)-C(18)-C(19) | 0.2(2)      |
| C(6)-C(7)-C(8)-C(8A)  | -3.8(2)     | C(17)-C(18)-C(19)-C(14) | -0.9(2)     |
| S(1)-C(7)-C(8)-C(8A)  | 171.24(11)  | C(15)-C(14)-C(19)-C(18) | 0.9(2)      |
| C(2)-N(1)-C(8A)-C(8)  | 175.34(13)  | C(13)-C(14)-C(19)-C(18) | 179.89(13)  |



Table 7. Hydrogen bonds for Cpd 49 [Å and °].

| D-H...A               | d(D-H)  | d(H...A) | d(D...A)   | <(DHA)    |
|-----------------------|---------|----------|------------|-----------|
| N(2)-H(2N)...O(3)     | 0.85(2) | 2.14(2)  | 2.8627(17) | 142.0(16) |
| C(5)-H(5)...O(1)#1    | 0.95    | 2.54     | 3.4331(18) | 156.0     |
| C(13)-H(13B)...O(3)#2 | 0.99    | 2.45     | 3.1847(19) | 131.1     |
| C(20)-H(20A)...O(3)#3 | 0.98    | 2.37     | 3.2998(19) | 158.3     |
| C(20)-H(20C)...O(4)#2 | 0.98    | 2.50     | 3.1502(19) | 123.8     |

Symmetry transformations used to generate equivalent atoms:

#1 -x+1, -y+2, -z+1    #2 x, y+1, z    #3 -x+3/2, -y+1/2, -z+1
